# Supplementary material
Source: PubMed Central journal article supplement (PMC9597672)
Supplement: NIHMS1815148-supplement-supinfo.pdf [file NIHMS1815148-supplement-supinfo.pdf]

|                                                                                                                                                                                                                        |    |
|------------------------------------------------------------------------------------------------------------------------------------------------------------------------------------------------------------------------|----|
| Supplementary methods.....                                                                                                                                                                                             | 2  |
| Supplementary table 1 Characteristics of cases and controls of European ancestry from the Courage-PD consortium by study site (after quality control).....                                                             | 7  |
| Supplementary table 2 SNPs used for Mendelian randomization analyses: individual associations with smoking initiation and Parkinson’s disease.....                                                                     | 9  |
| Supplementary table 3 SNPs in the HLA region associated with Parkinson’s disease .....                                                                                                                                 | 41 |
| Supplementary table 4 Association of alleles of <i>HLA</i> class II genes and and <i>HLA-DRB1</i> ~ <i>HLA-DQB1</i> haplotypes with Parkinson’s disease.....                                                           | 42 |
| Supplementary table 5 Association between amino acids in the HLA class II region and Parkinson’s disease .....                                                                                                         | 44 |
| Supplementary table 6 Independent and joint associations of amino-acids V11 and H13 or H33 encoded by <i>HLA-DRB1</i> and Parkinson’s disease.....                                                                     | 49 |
| Supplementary table 7 Independent and joint associations of the shared epitope (SE) and V11 with Parkinson’s disease .....                                                                                             | 50 |
| Supplementary table 8 Mendelian randomization analysis of the relation between genetically-predicted smoking initiation and Parkinson’s disease stratified by <i>HLA-DRB1</i> : exclusion of 31 pleiotropic SNPs ..... | 51 |
| Supplementary table 9 <i>In silico</i> prediction of binding affinity of <i>HLA-DRB1</i> alleles to alpha-synuclein derived peptides .....                                                                             | 52 |
| Supplementary table 10 <i>In silico</i> prediction of binding and non-binding alpha-synuclein derived peptides...                                                                                                      | 53 |

## Supplementary methods

### Courage-PD international consortium

The Courage-PD (COmprehensive Unbiased Risk Factor Assessment for Genetics and Environment in Parkinson's Disease) international consortium pooled individual-level data from 35 studies on Parkinson's disease from different populations worldwide and used the same array to genotype participants.

The Geo-PD (Genetic Epidemiology Of Parkinson's disease; <https://geopd.biomedinfo.org/>) consortium represents one of the components of Courage-PD. This consortium aims at conducting collaborative studies on genetic susceptibility in Parkinson's disease; one of its main features is that participating sites are distributed in the five continents, therefore representing a highly diverse population. In addition, several other studies from Europe contributed to Courage-PD. Parkinson's disease was diagnosed using standard criteria (United Kingdom Parkinson's Disease Society Brain Bank - UKPDSBB, Gelb, Bower).<sup>1-3</sup>

All studies were approved by local ethical committees following the procedures of each country, and material transfer agreements were set up between participating sites and the University of Tübingen (Germany).

According to the study's consortium agreement, participating sites contributed DNA and demographic/environmental data. DNAs (25µl of DNA at a concentration of 50 to 100 ng/µl) were shipped for quality control to University of Tübingen (Germany) and genotyped in a central laboratory in Munich (Institute of Human Genetics, Helmholtz Zentrum, Germany). The samples from two sites (Gasser, Morris/Wood) were genotyped at the Laboratory of Neurogenetics (National Institute on Aging, National Institutes of Health, Bethesda, USA). Demographic data were harmonized and collected using a standardized form and cleaned at Inserm U1018 (Villejuif, France).

In a previous study on the relation between genetically-predicted smoking and PD (7369 cases, 7018 controls), we excluded samples overlapping with iPDGC (to allow for an independent replication) and participants with a positive family history of PD or with Mendelian PD mutations (to avoid dilution of effects of environmental exposures).<sup>4</sup> For the present analyses whose main objective was to examine the interaction between genetically-predicted smoking and *HLA-DRB1*, we retained samples overlapping with iPDGC and those with familial PD in order to increase the sample size and the statistical power to detect an interaction, as the number of participants required to detect interactions is larger than for main effects. Analyses are therefore based on 26 studies with at least 50 cases or controls of European descent (12424 cases, 9480 controls; Supplementary Table 1).

### Genotyping

The Neurochip chip was used to genotype all the samples.<sup>5</sup> Briefly, this chip is a custom-designed array containing a tagging variant backbone with good genome-wide resolution of about 306,670, complemented with a manually curated custom content comprised of 179,467 variants implicated in diverse neurological diseases, including Parkinson's disease.

Genotyping was performed with an automated protocol according to the manufacturer's instructions (Illumina, San Diego, CA, USA). All arrays were scanned with an Illumina iScan and raw data were analyzed with the Illumina Beeline and GenomeStudio software packages using the manifest file `Neuro_Consortium_20013217_A1.bpm`. Clustering was performed in GenomeStudio with the GenTrain cluster 2.0 algorithm. Genotypes were post-processed with zCall (DOI: 10.1093/bioinformatics/bts479) to improve detection of rare alleles.

### Quality control

Genotyped data exported from Genome Studio to PLINK format were used for quality control and downstream analysis. The pooled dataset from the 35 sites consists of 27,538 subjects. Phenotypic data were missing for 245 subjects and three sites were removed as they only included cases, leaving 26,535 subjects (14,859 cases, 11,431 controls) for quality control using "COMRARE" an automated pipeline under development at the University of Tübingen. The pipeline uses PLINK (<https://www.cog-genomics.org/plink>) and R scripts (R Foundation for Statistical Computing, Vienna, Austria) and the following steps were implemented separately for each site:

*I- Per individual quality control:*

- Identification of individuals with elevated missing genotyping rates or outlying heterozygosity rate: individuals with a genotype failure rate  $\geq 4\%$  or heterozygosity rate  $\pm 4$  standard deviations from the mean were excluded.

- Identification of Individuals with discordant sex information: the homozygosity rate was calculated for X-linked SNPs for each individual and compared to the expected rate. Participants for whom phenotypic and genotypic sex were discordant were removed.
- Identification of duplicated or related Individuals: pairs of individuals with an identity by descent (IBD) greater than 0.185 were removed.
- Eigensoft software was used to compute principal components in order to correct for population stratification by merging our dataset with HapMap.<sup>6,7</sup> A scatter plot of the first two principal components was used to identify outliers in each study.

#### 2- Per marker quality control:

- Identification of markers with high missing data rate: a call-rate threshold of 96% was used and SNPs with a lower rate were removed.
- SNPs with a significant ( $P < 10^{-5}$ ) difference in rates of missing values between cases and controls were removed.
- We excluded variants with a minor allele frequency (MAF)  $< 5 \times 10^{-8}$  and those in Hardy-Weinberg disequilibrium ( $P < 5 \times 10^{-8}$ ).

## Imputation

After QC, we used the HRC/1000G imputation preparation and checking tool (<https://www.well.ox.ac.uk/~wrayner/tools/HRC-1000G-check-bim-v4.3.0.zip>) to check for Ref/Alt allele assignments, incorrect strands, deviation from allele frequency, and palindromic SNPs. Imputation of autosomal variants was performed separately for each dataset based on based on 271,398 to 373,664 SNPs in each study, through the Michigan Imputation server using the HRC reference panel and the GRCh37/hg19 assembly with a  $R^2$  filter of 0.3. The mean of the number of SNPs available in each study after imputation was 13,710,549 (SD=2,986,478).

## Imputation of HLA alleles

Sequence-based typing of *HLA* alleles is considered the gold standard for *HLA* typing, but is time-consuming and cost-prohibitive for research purposes. An alternative approach that has considerably developed over the past 10 years is SNP-based imputation of *HLA* alleles. These methods take advantage of the extended haplotype structure within the *HLA* region to predict *HLA* alleles using dense SNP genotypes such as those available in GWAS datasets and require access to large and ethnically diverse training datasets including both SNP and sequenced *HLA* alleles.<sup>8</sup>

Four-digit alleles of *HLA* class I (*HLA-A*, *HLA-B*, *HLA-C*) and II (*HLA-DPBI*, *HLA-DQAI*, *HLA-DQBI*, *HLA-DRBI*) genes were imputed based on GWAS data using the HIBAG R package (R Foundation for Statistical Computing, Vienna, Austria) separately in each of the 26 Courage-PD studies including European individuals (12,424 cases, 9,480 controls; Supplementary Table 2) using the European reference panel provided by HIBAG.<sup>8,9</sup> Given the results of previous studies that highlighted *HLA* class II genes in PD, the remainder of our analyses focused on these genes. Two-digit alleles (e.g., *HLA-DRBI*\*04) were derived by combining four-digit alleles (e.g., *HLA-DRBI*\*04:01, *HLA-DRBI*\*04:02, etc.).

Allelic imputation probabilities were high in all studies and comparable between cases and controls. As recommended in the original publication, we retained alleles with an imputation probability greater than 50% as this threshold represents the best compromise between accuracy and call rate.<sup>8</sup> At this threshold, HIBAG prediction accuracies ranged from 94.8% to 99.2% for four-digit alleles for individuals of European descent, with call rates between 90.1% and 98.8%.<sup>8</sup> A study that imputed *HLA* alleles in Europeans using HIBAG with a 50% threshold compared the results of *HLA-DRBI* imputation to high throughput *HLA* sequencing in 380 PD samples from Norway.<sup>10</sup> There was good agreement between imputed and sequenced alleles: for *HLA-DRBI*\*04:01 alleles, sensitivity was 96% and specificity was 91%; for *HLA-DRBI*\*04:04 alleles, sensitivity was 97% and specificity was 92%; for *HLA-DRBI*\*04 alleles, agreement was excellent (sensitivity, 98%; specificity, 96%).<sup>10</sup> In our study, on average, 3% of participants were excluded from the analyses due to an allelic imputation probability  $\leq 50\%$ ; depending on the gene, the number of cases included in the analyses ranged from 11,343 to 12,341 and the number of controls from 8,595 to 9,417. In sensitivity analyses based on a more stringent probability threshold of 80%, we verified that associations between *HLA* alleles and PD remained stable although the number of cases and controls decreased by ~29%.

## Haplotype and amino acid imputation of the HLA region

Imputation of *A~B~C~DRB1~DQB1* haplotypes and amino-acids (AA) was performed separately in each of the 26 Courage-PD studies including European individuals using Easy-HLA (<https://hla.univ-nantes.fr/>).<sup>11</sup> Easy-HLA implements a computational and statistical method of HLA haplotypes inference based on a published reference population containing over 600,000 haplotypes to upgrade missing or partial HLA information; it also provides additional functional annotations including AA of proteins coded by *HLA* alleles.

Subjects with allelic or haplotypic imputation probabilities  $\leq 50\%$  were excluded from subsequent analyses ( $\sim 15\%$ ) which are therefore based on 10,613 cases and 8,056 controls. As for *HLA* alleles, we restricted our analyses to *HLA* class II genes and defined *HLA-DRB1~HLA-DQB1* haplotypes ( $n=89$ ).

We determined *HLA-DRB1* alleles that carried the shared epitope (SE), a five AA sequence motif in positions 70-74 of *HLA-DR $\beta$*  chains encoded by *HLA-DRB1* alleles, using the IPD-IMGT/*HLA* database (Release 3.44.0, <https://www.ebi.ac.uk/ipd/imgt/hla/>).

## Statistical analyses

### Association between *HLA* and Parkinson's disease

We identified SNPs located in the *HLA* region between positions chr6:28,477,895 and chr6:33,448,264. Of 38,946 SNPs available in the *HLA* region, we selected 29,515 SNPs available in  $\geq 20$  studies. In addition to SNPs with a minor allele frequency (MAF)  $< 1\%$  and in Hardy-Weinberg disequilibrium ( $P < 5 \times 10^{-8}$ ), we also excluded those with low imputation quality ( $r^2 < 0.8$ ). We examined their association with Parkinson's disease in each study under an additive model using logistic regression adjusted for sex and the first four principal components (PC) using PLINK software (v1.9).<sup>12</sup> We used the GWAMA software<sup>13</sup> to pool summary statistics according to a fixed ( $I^2 \leq 25\%$ ) or random ( $I^2 > 25\%$ ) effects model and to calculate ORs and their 95% CI.

Allele frequencies of *HLA* class II genes, haplotypes, and AA were estimated in cases and controls per study and then meta-analysed to estimate pooled frequencies.

The association of Parkinson's disease with alleles of *HLA* class II genes, *DRB1~DQB1* haplotypes, and AA encoded by *HLA-DRB1* and *HLA-DQB1* was estimated under a dominant model using logistic regression adjusted for study, sex, and the first four principal components (PC). Alleles and haplotypes with a pooled frequency  $\leq 0.005$  in controls were excluded from the analyses. A total of 64 alleles of *HLA* class II genes (39 were available in 26 studies and 25 in 18-25 studies) and 24 *DRB1~DQB1* haplotypes (12 were available in 26 studies and 12 in 18-25 studies) were considered. We selected 247 AA available in at least 20 studies whose frequency in controls was  $\geq 0.005$  and  $\leq 0.995$  (226 available in 26 studies); after independent analyses for each AA, we used a backward stepwise selection procedure starting from a model including all AA and their two-way interactions. We also estimated Spearman correlations between AA significantly associated with Parkinson's disease in controls.

For all of the analyses described above, we accounted for multiple testing by calculating adjusted P-values (q-values) based on the false discovery rate (FDR) and considered those  $\leq 0.05$  as statistically significant.<sup>14</sup>

In order to assess the independent and joint effects of SE and VII, we constructed a four-class categorical variable corresponding to the combination of these two variables (dominant model); the interaction between the two variables was tested by including a multiplicative interaction term in the model. Given the absence of a significant interaction, we then ran a multivariable model including SE and VII to estimate their independent effects.

### Interaction between *HLA-DRB1* and genetically-predicted smoking initiation: stratified two-sample Mendelian randomisation

For our Mendelian randomization analysis, we excluded the Elbaz site as it was included in the initial study that showed an interaction between rs660895 and cigarette smoking in Parkinson's disease.<sup>15</sup>

Mendelian randomization uses genetic variants, mostly SNPs, associated with an exposure to estimate its causal effect on an outcome. In two-sample Mendelian randomization, the SNP-exposure and SNP-outcome association estimated (beta and SE) come from two independent samples. To be valid instrumental variable (IV), the SNPs must verify three assumptions: (i) they must be associated the exposure, (ii) they must not be directly associated with the outcome except through the exposure and (iii) they must not be associated with unmeasured confounders of the exposure-outcome association.<sup>16</sup>

After clumping to retain independent SNPs ( $r^2 > 0.001$ , genomic region=10,000 kb, based on European ancestry reference data from the 1000 Genomes Project), we selected a total of 203 SNPs associated with smoking initiation

in the GWAS and Sequencing of Alcohol and Nicotine use consortium (GSCAN),<sup>17</sup> of which 3 were not available in Courage-PD and 18 were excluded (palindromic SNPs with a minor allelic frequency  $\geq 0.42$ ;  $MAF < 0.01$ ; SNPs not available in at least 17 studies), leaving 182 SNPs for our Mendelian randomization analyses (F-statistic=205.75; **Supplementary table 2**); these SNPs explain 3% ( $R^2$ ) of the variance of the exposure (smoking initiation).<sup>4, 18</sup> Of these SNPs, 7 (3.8%) were genotyped and 175 (96.2%) were imputed; when genotyped SNPs were available, we selected them in priority.

We estimated associations between each of the 182 SNPs and PD in strata defined by *HLA-DRB1* (V11, rs660895, *HLA-DRB1\*04*). For each site, logistic regression adjusted for sex and the first four principal components was performed for each SNP under an additive genetic model (number of alleles for genotyped SNPs, dosage for imputed SNPs) using PLINK software (version 1.9).<sup>12</sup> Effects size and standard errors from the 26 studies were meta-analysed using the GWAMA software.<sup>13</sup> Those with low heterogeneity across studies ( $I^2 \leq 25\%$ ) were combined using a fixed-effect model, while we used a random-effects model for SNPs with high heterogeneity ( $I^2 > 25\%$ ).

We used the random effects inverse-variance weighted (IVW)<sup>19</sup> approach in two strata defined by *HLA-DRB1* (V11, rs660895, *HLA-DRB1\*04*), based on summary statistics corresponding to the association between SNPs and Parkinson's disease in Courage-PD, and the association between SNPs and smoking initiation in GSCAN. Heterogeneity between IVs was tested using the Cochran's Q-statistic. Compared to analyses stratified by V11 or *HLA-DRB1\*04* that relied on imputation of *HLA* alleles, analyses stratified by rs660895 did not require *HLA* imputation and are based on a larger number of cases and controls.

In sensitivity analyses, we used other MR approaches less sensitive to pleiotropic effects.<sup>18, 20</sup> The weighted median-method provides consistent estimates if at least 50% of the SNPs are valid instruments.<sup>21</sup> The weighted mode-based method uses the causal estimate from each SNP to calculate the modal estimate. The largest group of variants with the same causal estimate in the asymptotic limit are considered valid instruments.<sup>22</sup> MR-PRESSO allows to detect outliers (global test), to compute an estimate corrected for horizontal pleiotropy after removing them (if p-global test  $< 0.05$ ), and to test the difference between the original and updated estimates (distortion test).<sup>23</sup> The MR-Egger method can detect directional pleiotropy and provide corrected effect estimates, but it requires the strong and non-verifiable InSIDE (INstrument Strength Independent of Direct Effect) assumption and in some situations can lead to biased estimates and inflated Type I error.<sup>24</sup> We used the  $I^2_{GX}$  statistic to quantify the strength of regression dilution bias in SNP-exposure association estimates for MR-Egger, with values  $< 90\%$  indicating violation of the NOME (No Measurement Error) assumption.<sup>25</sup> There was no evidence of directional pleiotropy in any strata ( $P > 0.30$ ) but  $I^2_{GX}$  was of 0.66 in our study. For these reasons, we chose to use MR-Lasso instead, another robust method in which an individual intercept is included for each SNP, thus allowing to detect individual pleiotropic SNPs rather than testing for global directional pleiotropy (as MR-Egger does).<sup>26</sup> The penalty term in Lasso regression shrinks the intercepts and forces some of them to be 0; genetic variants whose intercept is 0 are considered as valid instruments and used in the analysis, while the others are considered as pleiotropic variants and are excluded. The degree of shrinkage is determined by the value of the tuning parameter  $\lambda$ . MR-Lasso is less sensitive than MR-Egger to violations of the InSIDE assumption.

We also searched for pleiotropic SNPs associated with PD or with exposures associated with PD (body mass index, alcohol drinking, coffee drinking) at a genome-wide significant level using the Phenoscanner database and phenoscanner R package to examine whether some SNPs were associated with PD or with environmental exposures associated with PD.<sup>27, 28</sup> We identified 7 SNPs associated with alcohol drinking and 26 SNPs associated with BMI (2 in common), and repeated the analyses after excluding 31 SNPs.

## References

1. Gelb DJ, Oliver E, Gilman S. Diagnostic criteria for Parkinson disease. *Arch Neurol* 1999;56:33-39.
2. Gibb WR, Lees AJ. The relevance of the Lewy body to the pathogenesis of idiopathic Parkinson's disease. *J Neurol Neurosurg Psychiatry* 1988;51:745-752.
3. Bower JH, Maraganore DM, McDonnell SK, Rocca WA. Incidence and distribution of parkinsonism in Olmsted County, Minnesota, 1976-1990. *Neurology* 1999;52:1214-1220.
4. Domenighetti C, Sugier PE, Sreelatha AAK, et al. Mendelian Randomisation Study of Smoking, Alcohol, and Coffee Drinking in Relation to Parkinson's Disease. *J Parkinsons Dis* 2022;12:267-282.
5. Blauwendraat C, Faghri F, Pihlstrom L, et al. NeuroChip, an updated version of the NeuroX genotyping platform to rapidly screen for variants associated with neurological diseases. *Neurobiol Aging* 2017;57:247.e249-247.e213.
6. Price AL, Patterson NJ, Plenge RM, et al. Principal components analysis corrects for stratification in genome-wide association studies. *Nat Genet* 2006;38:904-909.
7. Patterson N, Price AL, Reich D. Population structure and eigenanalysis. *PLoS genetics* 2006;2:e190.
8. Zheng X, Shen J, Cox C, et al. HIBAG—HLA genotype imputation with attribute bagging. *The Pharmacogenomics Journal* 2014;14:192-200.
9. Zheng X. Imputation-Based HLA Typing with SNPs in GWAS Studies. *Methods Mol Biol* 2018;1802:163-176.
10. Yu E, Ambati A, Andersen MS, et al. Fine mapping of the HLA locus in Parkinson's disease in Europeans. *NPJ Parkinsons Dis* 2021;7:84.
11. Geffard E, Limou S, Walencik A, et al. Easy-HLA: a validated web application suite to reveal the full details of HLA typing. *Bioinformatics* 2020;36:2157-2164.
12. Purcell S, Neale B, Todd-Brown K, et al. PLINK: a tool set for whole-genome association and population-based linkage analyses. *Am J Hum Genet* 2007;81:559-575.
13. Magi R, Morris AP. GWAMA: software for genome-wide association meta-analysis. *BMC Bioinformatics* 2010;11:288.
14. Storey JD, Tibshirani R. Statistical significance for genomewide studies. *Proc Natl Acad Sci U S A* 2003;100:9440-9445.
15. Chuang YH, Lee PC, Vlaar T, et al. Pooled analysis of the HLA-DRB1 by smoking interaction in Parkinson disease. *Ann Neurol* 2017;82:655-664.
16. Lawlor DA, Harbord RM, Sterne JA, et al. Mendelian randomization: using genes as instruments for making causal inferences in epidemiology. *Stat Med* 2008;27:1133-1163.
17. Liu M, Jiang Y, Wedow R, et al. Association studies of up to 1.2 million individuals yield new insights into the genetic etiology of tobacco and alcohol use. *Nat Genet* 2019;51:237-244.
18. Burgess S, Davey Smith G, Davies NM, et al. Guidelines for performing Mendelian randomization investigations. *Wellcome Open Res* 2019;4:186.
19. Burgess S, Butterworth A, Thompson SG. Mendelian randomization analysis with multiple genetic variants using summarized data. *Genet Epidemiol* 2013;37:658-665.
20. Slob EAW, Burgess S. A comparison of robust Mendelian randomization methods using summary data. *Genet Epidemiol* 2020;44:313-329.
21. Bowden J, Davey SG, Haycock PC, Burgess S. Consistent Estimation in Mendelian Randomization with Some Invalid Instruments Using a Weighted Median Estimator. *Genet Epidemiol* 2016;40:304-314.
22. Hartwig FP, Davey Smith G, Bowden J. Robust inference in summary data Mendelian randomization via the zero modal pleiotropy assumption. *Int J Epidemiol* 2017;46:1985-1998.
23. Verbanck M, Chen CY, Neale B, Do R. Detection of widespread horizontal pleiotropy in causal relationships inferred from Mendelian randomization between complex traits and diseases. *Nat Genet* 2018;50:693-698.
24. Burgess S, Thompson SG. Interpreting findings from Mendelian randomization using the MR-Egger method. *Eur J Epidemiol* 2017;32:377-389.
25. Bowden J, Del Greco MF, Minelli C, et al. Assessing the suitability of summary data for two-sample Mendelian randomization analyses using MR-Egger regression: the role of the I<sup>2</sup> statistic. *Int J Epidemiol* 2016;45:1961-1974.
26. Rees JMB, Wood AM, Dudbridge F, Burgess S. Robust methods in Mendelian randomization via penalization of heterogeneous causal estimates. *PLoS One* 2019;14:e0222362.
27. Kamat MA, Blackshaw JA, Young R, et al. PhenoScanner V2: an expanded tool for searching human genotype-phenotype associations. *Bioinformatics* 2019;35:4851-4853.
28. Staley JR, Blackshaw J, Kamat MA, et al. PhenoScanner: a database of human genotype-phenotype associations. *Bioinformatics* 2016;32:3207-3209.

**Supplementary table I Characteristics of cases and controls of European ancestry from the Courage-PD consortium by study site (after quality control)**

| Continent            | Principal investigator | Country      | Status   | N    | Sex (%) |        | Age at study |      |      | Age at PD onset |      |      | Age at diagnosis |      |      | Disease duration |     |
|----------------------|------------------------|--------------|----------|------|---------|--------|--------------|------|------|-----------------|------|------|------------------|------|------|------------------|-----|
|                      |                        |              |          |      | Male    | Female | Mean         | SD   | MD   | Mean            | SD   | MD   | Mean             | SD   | MD   | Mean             | SD  |
| <b>Africa</b>        | Bardien/Carr           | South Africa | Cases    | 170  | 61.2    | 38.8   | 68.7         | 10.6 |      | 60              | 11.9 |      | 60               | 11.9 |      | 8.7              | 6.4 |
|                      |                        |              | Controls | 85   | 56.5    | 43.5   | 51.1         | 12.7 |      | -               | -    |      | -                | -    |      |                  |     |
| <b>North America</b> | Farrer                 | Canada       | Cases    | 389  | 65.6    | 34.4   | 67.7         | 10.3 | 1    | 56.5            | 11.1 | 1    | 59               | 11   | 130  | 11.2             | 6.2 |
|                      |                        |              | Controls | 409  | 31.8    | 68.2   | 69.4         | 12.4 |      | -               | -    |      | -                | -    |      |                  |     |
|                      | Rogaeva/Lang           | Canada       | Cases    | 215  | 66      | 34     | 63.6         | 12.4 | 6    | 54              | 12.2 | 6    |                  |      |      | 9.6              | 5.9 |
|                      |                        |              | Controls | 153  | 37.9    | 62.1   | 73.8         | 8.6  |      | -               | -    |      | -                | -    |      |                  |     |
| <b>Australia</b>     | Mellick                | Australia    | Cases    | 480  | 64      | 36     | 68.3         | 9.3  |      | 59.1            | 11.3 |      | 60.7             | 10.7 | 13   | 9.2              | 7   |
|                      |                        |              | Controls | 508  | 45.3    | 54.7   | 66.9         | 9.6  |      | -               | -    |      | -                | -    |      |                  |     |
| <b>Europe</b>        | Aasly                  | Norway       | Cases    | 510  | 60      | 40     | 77.7         | 11.6 |      | 60.5            | 11   |      |                  |      |      | 17.2             | 5.7 |
|                      |                        |              | Controls | 509  | 54.8    | 45.2   | 73           | 14.1 | 79   | -               | -    |      | -                | -    |      |                  |     |
|                      | Annesi                 | Italy        | Cases    | 93   | 64.5    | 35.5   | 66.5         | 9    |      | 59.2            | 10.1 |      | 66.5             | 9    |      | 7.3              | 5.6 |
|                      |                        |              | Controls | 94   | 45.7    | 54.3   | 58.2         | 20.3 |      | -               | -    |      | -                | -    |      |                  |     |
|                      | Brice/Corvol/Lesage    | France       | Cases    | 851  | 58.4    | 41.6   | 60.7         | 10.9 | 32   | 51.9            | 11.1 | 32   |                  |      |      | 8.8              | 6.2 |
|                      |                        |              | Controls | 280  | 56.4    | 43.6   | 62.4         | 10.7 |      | -               | -    |      | -                | -    |      |                  |     |
|                      | Carmine Belin/Ran      | Sweden       | Cases    | 286  | 61.5    | 38.5   | 67.4         | 10.3 |      | 59.4            | 11.1 |      |                  |      |      | 8.1              | 6.1 |
|                      |                        |              | Controls | 629  | 55.2    | 44.8   | 66.5         | 10.4 | 597  | -               | -    |      | -                | -    |      |                  |     |
|                      | Chartier-Harlin/Mutez  | France       | Cases    | 370  | 54.3    | 45.7   | 64.3         | 9    |      | 52.7            | 10.5 |      | 53.8             | 10.2 |      | 11.6             | 5.9 |
|                      |                        |              | Controls | 228  | 39.9    | 60.1   | 59.9         | 12.6 |      | -               | -    |      | -                | -    |      |                  |     |
|                      | Deutschländer          | Germany      | Cases    | 285  | 61.8    | 38.2   | 69.4         | 9.9  |      | 60.4            | 11.5 |      | 59               | 11.1 | 213  | 9.1              | 6.5 |
|                      |                        |              | Controls | 46   | 30.4    | 69.6   | 66           | 10.3 |      | -               | -    |      | -                | -    |      |                  |     |
|                      | Duga/Cilia             | Italy        | Cases    | 1391 | 59.2    | 40.8   | 65.8         | 10.8 |      | 59.1            | 11.2 |      | 60.7             | 11   |      | 6.7              | 5.6 |
|                      |                        |              | Controls | 1370 | 33.7    | 66.3   | 61.9         | 10.9 |      | -               | -    |      | -                | -    |      |                  |     |
|                      | Elbaz                  | France       | Cases    | 455  | 59.8    | 40.2   | 70.1         | 7.4  |      | 64.9            | 7.7  |      | 65.8             | 7.5  | 1    | 5.2              | 4.1 |
|                      |                        |              | Controls | 1066 | 59.2    | 40.8   | 69.8         | 7.6  |      | -               | -    |      | -                | -    |      |                  |     |
| Ferreira             | Portugal               | Cases        | 415      | 57.1 | 42.9    | 69     | 10.1         |      | 57.9 | 11.9            |      | 59.5 | 11.9             |      | 11.2 | 7.6              |     |
|                      |                        | Controls     | 67       | 25.4 | 74.6    | 47.1   | 17.8         |      | -    | -               |      | -    | -                |      |      |                  |     |
| Gasser/Sharma        | Germany                | Cases        | 1664     | 62.7 | 37.3    | 65.1   | 10.3         |      | 59.6 | 10.9            |      | 60.7 | 10.5             | 948  | 5.5  | 5.6              |     |
|                      |                        | Controls     | 1070     | 50.7 | 49.3    | 60.7   | 7.4          |      | -    | -               |      | -    | -                |      |      |                  |     |
| Hadjigeorgiou        | Greece                 | Cases        | 283      | 48.4 | 51.6    | 67.9   | 10.3         |      | 63.1 | 10.1            |      | 64   | 10.2             |      | 4.8  | 4.4              |     |
|                      |                        | Controls     | 314      | 47.1 | 52.9    | 69.8   | 8.7          |      | -    | -               |      | -    | -                |      |      |                  |     |
| Koks/Taba            | Estonia                | Cases        | 216      | 39.8 | 60.2    | 73     | 8.2          |      | 66.8 | 9.8             |      |      |                  |      | 6.2  | 5.3              |     |
|                      |                        | Controls     | 170      | 41.8 | 58.2    | 72.3   | 10.2         |      | -    | -               |      | -    | -                |      |      |                  |     |
| Krüger               | Luxembourg             | Cases        | 333      | 67.3 | 32.7    | 67.4   | 11.2         |      | 59.7 | 13              |      | 61.9 | 12.1             | 17   | 7.2  | 6.6              |     |
|                      |                        | Controls     | 360      | 55.8 | 44.2    | 58.1   | 11.9         |      | -    | -               |      | -    | -                |      |      |                  |     |

| Continent | Principal investigator | Country        | Status          | N            | Sex (%) |        | Age at study |      |     | Age at PD onset |      |    | Age at diagnosis |      |     | Disease duration |     |
|-----------|------------------------|----------------|-----------------|--------------|---------|--------|--------------|------|-----|-----------------|------|----|------------------|------|-----|------------------|-----|
|           |                        |                |                 |              | Male    | Female | Mean         | SD   | MD  | Mean            | SD   | MD | Mean             | SD   | MD  | Mean             | SD  |
|           | Morris/Wood            | United Kingdom | Cases           | 1389         | 67.6    | 32.4   |              |      |     |                 |      |    |                  |      |     |                  |     |
|           |                        |                | Controls        | 579          | 24.7    | 75.3   |              |      |     | -               | -    |    | -                | -    |     |                  |     |
|           | Pastor/Diez-Fairen     | Spain          | Cases           | 499          | 57.1    | 42.9   | 67           | 10.6 | 2   | 58.9            | 11.9 | 2  |                  |      |     | 8.1              | 6.8 |
|           |                        |                | Controls        | 338          | 40.8    | 59.2   | 66           | 11.3 |     | -               | -    |    | -                | -    |     |                  |     |
|           | Puschmann              | Sweden         | Cases           | 110          | 62.7    | 37.3   | 68.8         | 10.6 |     | 60.5            | 10.6 |    | 47               |      | 109 | 8.2              | 5.4 |
|           |                        |                | Controls        | 105          | 29.5    | 70.5   | 66.7         | 8.9  |     | -               | -    |    | -                | -    |     |                  |     |
|           | Stefanis/Simitsi       | Greece         | Cases           | 242          | 61.6    | 38.4   | 67.1         | 13.5 |     | 60.7            | 13.6 |    | 61.3             | 12.7 | 68  | 6.4              | 6.7 |
|           |                        |                | Controls        | 181          | 35.9    | 64.1   | 67           | 9.6  |     | -               | -    |    | -                | -    |     |                  |     |
|           | Toft                   | Norway         | Cases           | 480          | 62.9    | 37.1   | 65.7         | 8.9  |     | 55.9            | 11.3 |    | 54.4             | 10   | 144 | 9.8              | 6.7 |
|           |                        |                | Controls        | 442          | 55.7    | 44.3   | 62           | 11.1 |     | -               | -    |    | -                | -    |     |                  |     |
|           | Tolosa                 | Spain          | Cases           | 309          | 60.5    | 39.5   | 66           | 10.6 |     | 58.5            | 11.3 |    |                  |      |     | 7.6              | 6.2 |
|           |                        |                | Controls        | 68           | 16.2    | 83.8   | 62.3         | 12.1 | 8   | -               | -    |    | -                | -    |     |                  |     |
|           | Valente                | Italy          | Cases           | 326          | 62.3    | 37.7   | 67           | 12.1 | 7   | 55.3            | 10.9 | 7  | 59               | 7.9  | 239 | 11.7             | 8   |
|           |                        |                | Controls        | 54           | 38.9    | 61.1   | 78.4         | 9.6  |     | -               | -    |    | -                | -    |     |                  |     |
|           | Wirdefeldt             | Sweden         | Cases           | 65           | 53.8    | 46.2   | 75.7         | 8.1  |     | 66.6            | 9.9  |    |                  |      |     | 8.6              | 5.5 |
|           |                        |                | Controls        | 171          | 45.6    | 54.4   | 73.6         | 9.8  |     | -               | -    |    | -                | -    |     |                  |     |
|           | Zimprich               | Austria        | Cases           | 598          | 63.4    | 36.6   | 66.8         | 11.3 |     | 58.8            | 11.3 |    |                  |      |     | 8                | 0   |
|           |                        |                | Controls        | 184          | 40.8    | 59.2   |              |      | 184 | -               | -    |    | -                | -    |     |                  |     |
|           | <b>Total</b>           |                | <b>Cases</b>    | <b>12424</b> |         |        |              |      |     |                 |      |    |                  |      |     |                  |     |
|           |                        |                | <b>Controls</b> | <b>9480</b>  |         |        |              |      |     |                 |      |    |                  |      |     |                  |     |

Abbreviation: MD = missing data; SD = standard deviation.

Duration of disease = age at study - age at PD onset. Missing values are the same as those for age at study.



**Supplementary table 2 SNPs used for Mendelian randomization analyses: individual associations with smoking initiation and Parkinson's disease**

| SNP                   | Chr:Pos(GRCh37) | EA/BA | Smoking initiation (GSCAN) |       |       |          | Parkinson's disease (Courage-PD) |           |                 |                 |       | I <sup>2</sup> (%) | R <sup>2</sup> |          |
|-----------------------|-----------------|-------|----------------------------|-------|-------|----------|----------------------------------|-----------|-----------------|-----------------|-------|--------------------|----------------|----------|
|                       |                 |       | EAF                        | Beta  | SE    | P-value  | N studies                        | N samples | EAF             | Beta            | SE    |                    |                | P-value  |
| <b>VII: 0 residue</b> |                 |       |                            |       |       |          |                                  |           |                 |                 |       |                    |                |          |
| rs1008078             | 1:91189731      | T/C   | 0.40                       | 0.023 | 0.003 | 1.63E-18 | 25                               | 14228     | 0.40            | -0.006          | 0.040 | 8.83E-01           | 44.5           | 2.50E-04 |
| rs1022376             | 2:22067213      | T/C   | 0.48                       | 0.015 | 0.003 | 1.66E-08 | 25                               | 14228     | 0.51            | 0.003           | 0.027 | 9.09E-01           | 0.0            | 1.09E-04 |
| rs10233018            | 7:117523709     | G/A   | 0.52                       | 0.025 | 0.003 | 4.77E-22 | 25                               | 14228     | 0.50            | 0.005           | 0.027 | 8.43E-01           | 0.0            | 3.03E-04 |
| rs10279261            | 7:133589846     | G/A   | 0.38                       | 0.019 | 0.003 | 6.05E-13 | 25                               | 14228     | 0.39            | 0.015           | 0.028 | 6.05E-01           | 0.0            | 1.68E-04 |
| rs1030015*            | 7:78139581      | T/G   | 0.52                       | 0.014 | 0.003 | 2.15E-08 | 25                               | 14228     | 0.52            | -0.016          | 0.030 | 5.96E-01           | 12.8           | 1.02E-04 |
| rs10490159            | 2:51341259      | T/C   | 0.39                       | 0.017 | 0.003 | 3.86E-11 | 25                               | 14228     | 0.39            | -0.033          | 0.027 | 2.28E-01           | 0.0            | 1.42E-04 |
| rs1050847             | 16:87443734     | C/T   | 0.44                       | 0.015 | 0.003 | 7.37E-09 | 25                               | 14228     | 0.47            | 0.026           | 0.027 | 3.49E-01           | 0.0            | 1.08E-04 |
| rs10789369            | 1:73824909      | A/G   | 0.38                       | 0.023 | 0.003 | 3.39E-19 | 25                               | 14228     | 0.43            | -0.010          | 0.036 | 7.91E-01           | 30.6           | 2.60E-04 |
| rs10853981            | 19:4965064      | A/G   | 0.33                       | 0.015 | 0.003 | 4.88E-08 | 25                               | 14228     | 0.31            | -0.035          | 0.029 | 2.24E-01           | 0.0            | 9.67E-05 |
| rs10858334            | 9:137989785     | G/C   | 0.14                       | 0.023 | 0.004 | 1.18E-09 | 25                               | 14228     | 0.14            | -0.044          | 0.040 | 2.66E-01           | 0.0            | 1.26E-04 |
| rs10885480            | 10:115378364    | T/C   | 0.72                       | 0.019 | 0.003 | 3.83E-11 | 25                               | 14228     | 0.73            | 0.003           | 0.030 | 9.29E-01           | 0.0            | 1.42E-04 |
| rs10914684            | 1:33795572      | G/A   | 0.68                       | 0.016 | 0.003 | 6.32E-09 | 25                               | 14228     | 0.67            | -0.012          | 0.028 | 6.85E-01           | 0.0            | 1.09E-04 |
| rs10945141            | 6:69470709      | A/G   | 0.26                       | 0.018 | 0.003 | 3.59E-10 | 25                               | 14228     | 0.26            | -0.011          | 0.030 | 7.03E-01           | 0.0            | 1.28E-04 |
| rs10953957            | 7:121954709     | A/G   | 0.39                       | 0.014 | 0.003 | 3.66E-08 | 25                               | 14228     | 0.39            | 0.018           | 0.028 | 5.18E-01           | 19.5           | 9.84E-05 |
| rs10966092            | 9:23831658      | T/C   | 0.73                       | 0.020 | 0.003 | 1.12E-12 | 25                               | 14228     | 0.73            | 0.037           | 0.030 | 2.17E-01           | 0.0            | 1.64E-04 |
| rs11057005            | 12:16748721     | A/G   | 0.56                       | 0.016 | 0.003 | 9.12E-10 | 25                               | 14228     | 0.58            | -0.027          | 0.028 | 3.43E-01           | 15.7           | 1.22E-04 |
| rs1106363             | 11:131966264    | T/C   | 0.34                       | 0.017 | 0.003 | 9.20E-11 | 25                               | 14228     | 0.36            | -0.009          | 0.028 | 7.35E-01           | 0.0            | 1.36E-04 |
| rs11076962            | 16:5811367      | C/T   | 0.28                       | 0.018 | 0.003 | 1.20E-10 | 25                               | 14228     | 0.26            | 0.031           | 0.030 | 3.06E-01           | 1.6            | 1.35E-04 |
| rs1108130             | 13:100648356    | A/T   | 0.21                       | 0.024 | 0.003 | 1.57E-14 | 25                               | 14228     | 0.20            | -0.039          | 0.034 | 2.48E-01           | 3.5            | 1.92E-04 |
| rs1109480             | 12:121083279    | G/A   | 0.62                       | 0.017 | 0.003 | 1.84E-10 | 25                               | 14228     | 0.62            | -0.030          | 0.028 | 2.83E-01           | 0.0            | 1.32E-04 |
| rs11128203            | 3:71064431      | A/T   | 0.53                       | 0.020 | 0.003 | 1.29E-15 | 12                               | 5540      | Excluded for MR |                 |       |                    |                |          |
| rs11162019            | 1:87913176      | C/T   | 0.64                       | 0.015 | 0.003 | 5.06E-09 | 25                               | 14228     | 0.65            | -0.017          | 0.036 | 6.38E-01           | 26.4           | 1.11E-04 |
| rs1116690             | 4:143510148     | G/A   | 0.74                       | 0.016 | 0.003 | 2.16E-08 | 23                               | 13789     | 0.71            | 0.037           | 0.031 | 2.35E-01           | 0.0            | 1.02E-04 |
| rs1126757*            | 19:55879872     | T/C   | 0.47                       | 0.014 | 0.003 | 2.92E-08 | 25                               | 14213     | 0.47            | -0.014          | 0.026 | 6.00E-01           | 0.0            | 1.00E-04 |
| rs112725451           | 4:68017710      | T/C   | 0.17                       | 0.026 | 0.003 | 1.65E-14 | 25                               | 14228     | 0.17            | 0.018           | 0.048 | 7.10E-01           | 37.2           | 1.91E-04 |
| rs113230003           | 19:18460956     | G/A   | 0.74                       | 0.019 | 0.003 | 1.05E-10 | 25                               | 14228     | 0.76            | 0.051           | 0.032 | 1.16E-01           | 0.0            | 1.35E-04 |
| rs1139897             | 16:720986       | G/A   | 0.77                       | 0.024 | 0.003 | 1.77E-15 | 24                               | 14078     | 0.78            | 0.023           | 0.033 | 4.82E-01           | 23.5           | 2.06E-04 |
| rs1150668             | 6:28129789      | T/G   | 0.58                       | 0.019 | 0.003 | 8.54E-13 | 25                               | 14228     | 0.58            | -0.014          | 0.028 | 6.11E-01           | 0.0            | 1.67E-04 |
| rs11594623            | 10:103960351    | C/T   | 0.23                       | 0.027 | 0.003 | 7.45E-20 | 25                               | 14228     | 0.21            | -0.034          | 0.032 | 2.96E-01           | 1.0            | 2.70E-04 |
| rs1160685             | 4:94052854      | G/C   | 0.45                       | 0.015 | 0.003 | 2.31E-09 | 25                               | 14228     | 0.48            | Excluded for MR |       |                    |                |          |
| rs11611651            | 12:133380790    | A/G   | 0.09                       | 0.027 | 0.005 | 2.05E-09 | 25                               | 14228     | 0.08            | -0.062          | 0.049 | 2.10E-01           | 0.0            | 1.17E-04 |
| rs11642231            | 16:89608702     | G/A   | 0.63                       | 0.016 | 0.003 | 3.44E-09 | 25                               | 14228     | 0.67            | 0.058           | 0.029 | 4.44E-02           | 0.0            | 1.13E-04 |
| rs11713899            | 3:2365026       | C/A   | 0.17                       | 0.019 | 0.003 | 3.15E-08 | 24                               | 13788     | 0.17            | -0.030          | 0.036 | 4.10E-01           | 0.0            | 9.93E-05 |
| rs6050446†            | 20:25195509     | G/C   | 0.95                       | 0.054 | 0.008 | 8.80E-13 | 21                               | 13057     | 0.98            | -0.110          | 0.094 | 2.41E-01           | 12.9           | 2.81E-04 |
| rs117657830           | 16:75766873     | A/G   | 0.96                       | 0.038 | 0.006 | 3.18E-09 | 25                               | 14228     | 0.96            | -0.017          | 0.068 | 8.06E-01           | 0.0            | 1.14E-04 |
| rs11768481            | 7:96629103      | C/A   | 0.66                       | 0.019 | 0.003 | 5.23E-12 | 7                                | 4162      | Excluded for MR |                 |       |                    |                |          |

| SNP         | Chr:Pos(GRCh37) | EA/BA | Smoking initiation (GSCAN) |       |       |          | Parkinson's disease (Courage-PD) |           |                 |        |       |          |                    |                |  |
|-------------|-----------------|-------|----------------------------|-------|-------|----------|----------------------------------|-----------|-----------------|--------|-------|----------|--------------------|----------------|--|
|             |                 |       | EAF                        | Beta  | SE    | P-value  | N studies                        | N samples | EAF             | Beta   | SE    | P-value  | I <sup>2</sup> (%) | R <sup>2</sup> |  |
| rs117734003 | 19:51129745     | C/G   | 0.07                       | 0.030 | 0.005 | 2.57E-09 | 17                               | 9835      | Excluded for MR |        |       |          |                    |                |  |
| rs11783093  | 8:27425349      | C/T   | 0.84                       | 0.047 | 0.003 | 2.07E-41 | 25                               | 14228     | 0.84            | -0.015 | 0.036 | 6.79E-01 | 18.0               | 5.91E-04       |  |
| rs11791671  | 9:3398679       | T/C   | 0.07                       | 0.028 | 0.005 | 4.24E-08 | 25                               | 14228     | 0.06            | 0.032  | 0.056 | 5.75E-01 | 24.1               | 9.74E-05       |  |
| rs118202    | 6:111658371     | G/T   | 0.19                       | 0.037 | 0.003 | 1.90E-29 | 25                               | 14228     | 0.19            | -0.084 | 0.051 | 9.83E-02 | 42.1               | 4.12E-04       |  |
| rs1187820   | 3:173072584     | C/T   | 0.56                       | 0.014 | 0.003 | 2.69E-08 | 25                               | 14228     | 0.56            | 0.032  | 0.029 | 2.71E-01 | 17.2               | 1.00E-04       |  |
| rs12022778  | 1:50603995      | C/A   | 0.20                       | 0.027 | 0.003 | 3.18E-17 | 25                               | 14228     | 0.19            | -0.006 | 0.034 | 8.54E-01 | 0.0                | 2.32E-04       |  |
| rs12027999  | 1:154206358     | T/C   | 0.88                       | 0.024 | 0.004 | 5.33E-10 | 25                               | 14228     | 0.89            | -0.004 | 0.044 | 9.34E-01 | 0.0                | 1.25E-04       |  |
| rs12130857  | 1:7791461       | G/A   | 0.68                       | 0.018 | 0.003 | 3.65E-11 | 25                               | 14228     | 0.69            | -0.043 | 0.029 | 1.35E-01 | 0.0                | 1.42E-04       |  |
| rs12195240  | 6:98636905      | A/G   | 0.28                       | 0.025 | 0.003 | 1.08E-18 | 25                               | 14228     | 0.29            | 0.018  | 0.029 | 5.33E-01 | 0.0                | 2.53E-04       |  |
| rs12244388  | 10:104640052    | A/G   | 0.35                       | 0.026 | 0.003 | 4.31E-22 | 25                               | 14228     | 0.37            | -0.054 | 0.028 | 5.32E-02 | 0.0                | 3.03E-04       |  |
| rs12474587  | 2:162802993     | T/G   | 0.43                       | 0.024 | 0.003 | 4.83E-21 | 25                               | 14228     | 0.40            | 0.034  | 0.027 | 2.18E-01 | 0.0                | 2.88E-04       |  |
| rs12517438  | 5:30842054      | G/T   | 0.54                       | 0.015 | 0.003 | 1.89E-09 | 25                               | 14228     | 0.52            | 0.013  | 0.027 | 6.15E-01 | 0.0                | 1.17E-04       |  |
| rs12633090  | 3:83241365      | G/C   | 0.82                       | 0.023 | 0.003 | 3.16E-12 | 24                               | 13788     | 0.81            | 0.057  | 0.045 | 2.00E-01 | 28.7               | 1.58E-04       |  |
| rs12714017  | 2:80999398      | C/T   | 0.51                       | 0.015 | 0.003 | 3.65E-09 | 25                               | 14228     | 0.52            | -0.003 | 0.027 | 8.98E-01 | 0.0                | 1.18E-04       |  |
| rs12739243  | 1:210302043     | T/C   | 0.78                       | 0.021 | 0.003 | 4.45E-12 | 25                               | 14228     | 0.78            | 0.023  | 0.040 | 5.63E-01 | 25.2               | 1.56E-04       |  |
| rs12878369  | 14:28346502     | A/C   | 0.41                       | 0.017 | 0.003 | 1.60E-11 | 25                               | 14228     | 0.42            | -0.056 | 0.027 | 4.01E-02 | 0.0                | 1.48E-04       |  |
| rs12918191  | 16:50945156     | A/G   | 0.76                       | 0.020 | 0.003 | 3.14E-11 | 25                               | 14228     | 0.76            | 0.001  | 0.031 | 9.70E-01 | 0.0                | 1.43E-04       |  |
| rs1291821   | 10:11133823     | G/A   | 0.53                       | 0.014 | 0.003 | 1.39E-08 | 25                               | 14228     | 0.54            | -0.049 | 0.027 | 7.15E-02 | 1.9                | 1.05E-04       |  |
| rs13007361  | 2:166250244     | A/G   | 0.21                       | 0.018 | 0.003 | 2.29E-08 | 25                               | 14228     | 0.21            | 0.039  | 0.032 | 2.24E-01 | 0.0                | 1.01E-04       |  |
| rs13110073  | 4:147797913     | T/C   | 0.60                       | 0.025 | 0.003 | 3.24E-21 | 25                               | 14228     | 0.62            | -0.057 | 0.027 | 3.52E-02 | 0.0                | 2.90E-04       |  |
| rs13261666  | 8:59814666      | G/T   | 0.48                       | 0.020 | 0.003 | 4.36E-15 | 25                               | 14228     | 0.48            | -0.008 | 0.027 | 7.58E-01 | 0.0                | 2.00E-04       |  |
| rs13392222  | 2:100672408     | A/C   | 0.86                       | 0.023 | 0.004 | 1.93E-10 | 25                               | 14228     | 0.87            | 0.034  | 0.040 | 4.04E-01 | 0.0                | 1.31E-04       |  |
| rs13437771  | 7:99071478      | A/G   | 0.84                       | 0.027 | 0.004 | 1.39E-14 | 25                               | 14228     | 0.85            | -0.031 | 0.037 | 4.05E-01 | 5.3                | 1.93E-04       |  |
| rs1373178   | 18:49967811     | T/G   | 0.41                       | 0.020 | 0.003 | 4.16E-15 | 25                               | 14228     | 0.42            | -0.029 | 0.027 | 2.86E-01 | 0.0                | 2.00E-04       |  |
| rs1381287   | 14:98597552     | T/C   | 0.47                       | 0.018 | 0.003 | 1.81E-12 | 25                               | 14228     | 0.49            | 0.018  | 0.027 | 4.98E-01 | 0.0                | 1.62E-04       |  |
| rs1381775   | 11:42442826     | T/C   | 0.29                       | 0.016 | 0.003 | 2.79E-08 | 25                               | 14228     | 0.29            | -0.033 | 0.030 | 2.62E-01 | 0.0                | 1.00E-04       |  |
| rs1385108   | 5:154839646     | T/C   | 0.24                       | 0.019 | 0.003 | 3.84E-10 | 25                               | 14228     | 0.23            | -0.026 | 0.032 | 4.19E-01 | 0.0                | 1.27E-04       |  |
| rs13906     | 12:49952394     | C/T   | 0.89                       | 0.025 | 0.004 | 1.98E-09 | 25                               | 14228     | 0.89            | -0.043 | 0.043 | 3.19E-01 | 0.0                | 1.17E-04       |  |
| rs1435672   | 15:36399479     | C/T   | 0.56                       | 0.014 | 0.003 | 3.82E-08 | 25                               | 14228     | 0.53            | 0.015  | 0.027 | 5.78E-01 | 0.0                | 9.80E-05       |  |
| rs1445649   | 2:155682556     | C/T   | 0.54                       | 0.021 | 0.003 | 8.48E-16 | 25                               | 14228     | 0.54            | -0.021 | 0.027 | 4.28E-01 | 0.0                | 2.10E-04       |  |
| rs1449012   | 3:159048333     | C/T   | 0.54                       | 0.015 | 0.003 | 1.77E-09 | 25                               | 14228     | 0.53            | 0.012  | 0.027 | 6.60E-01 | 13.2               | 1.18E-04       |  |
| rs147052174 | 1:179783167     | T/G   | 0.02                       | 0.062 | 0.010 | 2.30E-10 | 10                               | 6981      | Excluded for MR |        |       |          |                    |                |  |
| rs1514176   | 1:74991596      | G/A   | 0.42                       | 0.019 | 0.003 | 7.67E-14 | 25                               | 14228     | 0.43            | -0.009 | 0.027 | 7.48E-01 | 0.0                | 1.81E-04       |  |
| rs1549979   | 3:85460131      | C/T   | 0.38                       | 0.025 | 0.003 | 8.80E-21 | 24                               | 13788     | 0.38            | 0.051  | 0.028 | 6.97E-02 | 5.0                | 2.85E-04       |  |
| rs160631    | 6:52895230      | T/G   | 0.27                       | 0.017 | 0.003 | 1.87E-09 | 25                               | 14228     | 0.28            | 0.020  | 0.030 | 5.09E-01 | 22.6               | 1.17E-04       |  |
| rs16826827  | 2:147825689     | T/C   | 0.88                       | 0.022 | 0.004 | 9.17E-09 | 25                               | 14228     | 0.88            | 0.042  | 0.041 | 3.10E-01 | 0.0                | 1.07E-04       |  |
| rs1713676*  | 11:113660576    | A/G   | 0.48                       | 0.017 | 0.003 | 5.38E-11 | 25                               | 14228     | 0.47            | -0.004 | 0.026 | 8.67E-01 | 0.0                | 1.40E-04       |  |
| rs1714521   | 3:158284861     | A/C   | 0.59                       | 0.016 | 0.003 | 3.07E-10 | 25                               | 14228     | 0.61            | 0.013  | 0.038 | 7.25E-01 | 36.9               | 1.29E-04       |  |
| rs17197663  | 13:38172867     | G/A   | 0.88                       | 0.022 | 0.004 | 2.06E-08 | 25                               | 14228     | 0.87            | 0.073  | 0.040 | 6.63E-02 | 0.0                | 1.02E-04       |  |

| SNP        | Chr:Pos(GRCh37) | EA/BA | Smoking initiation (GSCAN) |       |       |          | Parkinson's disease (Courage-PD) |           |                 |                 |       |          |                    |                |
|------------|-----------------|-------|----------------------------|-------|-------|----------|----------------------------------|-----------|-----------------|-----------------|-------|----------|--------------------|----------------|
|            |                 |       | EAF                        | Beta  | SE    | P-value  | N studies                        | N samples | EAF             | Beta            | SE    | P-value  | I <sup>2</sup> (%) | R <sup>2</sup> |
| rs17229285 | 2:199523122     | C/T   | 0.50                       | 0.015 | 0.003 | 1.27E-09 | 25                               | 14228     | 0.52            | 0.032           | 0.041 | 4.38E-01 | 46.5               | 1.20E-04       |
| rs1733760  | 10:56698174     | C/T   | 0.51                       | 0.015 | 0.003 | 6.70E-09 | 25                               | 14228     | 0.49            | 0.047           | 0.027 | 8.42E-02 | 0.0                | 1.09E-04       |
| rs1737329  | 6:163807748     | G/C   | 0.74                       | 0.017 | 0.003 | 5.08E-09 | 25                               | 14228     | 0.72            | 0.030           | 0.041 | 4.74E-01 | 33.4               | 1.11E-04       |
| rs17554906 | 6:92226609      | C/G   | 0.44                       | 0.014 | 0.003 | 3.14E-08 | 25                               | 14228     | 0.42            | Excluded for MR |       |          |                    |                |
| rs1772572  | 13:81191176     | C/A   | 0.68                       | 0.017 | 0.003 | 5.62E-10 | 25                               | 14228     | 0.68            | -0.043          | 0.028 | 1.24E-01 | 0.0                | 1.25E-04       |
| rs1811739  | 14:77529375     | A/G   | 0.25                       | 0.018 | 0.003 | 5.97E-10 | 25                               | 14228     | 0.25            | 0.001           | 0.031 | 9.61E-01 | 23.8               | 1.25E-04       |
| rs1889571  | 1:32195819      | G/T   | 0.13                       | 0.022 | 0.004 | 4.19E-09 | 25                               | 14228     | 0.12            | 0.050           | 0.041 | 2.22E-01 | 0.0                | 1.12E-04       |
| rs1901477  | 2:104126983     | G/A   | 0.51                       | 0.030 | 0.003 | 2.07E-31 | 25                               | 14228     | 0.52            | 0.014           | 0.040 | 7.28E-01 | 46.4               | 4.63E-04       |
| rs2010921  | 11:132098205    | A/G   | 0.31                       | 0.017 | 0.003 | 2.47E-10 | 25                               | 14228     | 0.31            | -0.013          | 0.029 | 6.58E-01 | 0.0                | 1.30E-04       |
| rs2063976  | 8:91096366      | C/T   | 0.34                       | 0.020 | 0.003 | 7.45E-14 | 25                               | 14228     | 0.34            | 0.007           | 0.028 | 7.99E-01 | 0.0                | 1.81E-04       |
| rs2155646  | 11:112912811    | C/T   | 0.40                       | 0.038 | 0.003 | 9.44E-48 | 25                               | 14228     | 0.40            | -0.007          | 0.027 | 8.04E-01 | 0.0                | 6.85E-04       |
| rs2173019  | 5:167614971     | A/T   | 0.18                       | 0.028 | 0.003 | 2.98E-17 | 25                               | 14228     | 0.17            | 0.012           | 0.035 | 7.33E-01 | 9.9                | 2.32E-04       |
| rs221988   | 3:64234307      | A/C   | 0.62                       | 0.015 | 0.003 | 1.43E-08 | 24                               | 13788     | 0.62            | 0.007           | 0.029 | 8.09E-01 | 1.8                | 1.05E-04       |
| rs2279829  | 3:147106319     | C/T   | 0.78                       | 0.017 | 0.003 | 2.05E-08 | 25                               | 14228     | 0.80            | 0.007           | 0.034 | 8.37E-01 | 6.0                | 1.02E-04       |
| rs2289791  | 15:67476952     | G/T   | 0.75                       | 0.018 | 0.003 | 2.01E-09 | 12                               | 5540      | Excluded for MR |                 |       |          |                    |                |
| rs2319545  | 3:147719648     | A/C   | 0.15                       | 0.023 | 0.004 | 8.30E-11 | 25                               | 14228     | 0.13            | -0.024          | 0.040 | 5.55E-01 | 5.5                | 1.37E-04       |
| rs2378662  | 9:86707289      | A/G   | 0.54                       | 0.015 | 0.003 | 2.67E-09 | 25                               | 14228     | 0.53            | 0.016           | 0.028 | 5.64E-01 | 15.8               | 1.15E-04       |
| rs2526390  | 3:50192760      | T/C   | 0.33                       | 0.020 | 0.003 | 3.62E-14 | 24                               | 13788     | 0.34            | -0.001          | 0.029 | 9.62E-01 | 0.0                | 1.86E-04       |
| rs2587507* | 17:77790135     | T/C   | 0.50                       | 0.015 | 0.003 | 8.69E-09 | 25                               | 14224     | 0.51            | -0.011          | 0.026 | 6.85E-01 | 0.0                | 1.07E-04       |
| rs2710634  | 2:32808804      | T/C   | 0.48                       | 0.018 | 0.003 | 3.36E-12 | 25                               | 14228     | 0.50            | -0.021          | 0.027 | 4.30E-01 | 0.0                | 1.57E-04       |
| rs2796793  | 10:36634124     | A/G   | 0.45                       | 0.014 | 0.003 | 1.55E-08 | 24                               | 13416     | 0.43            | 0.060           | 0.040 | 1.27E-01 | 42.1               | 1.04E-04       |
| rs281296   | 15:47685010     | A/G   | 0.36                       | 0.025 | 0.003 | 1.59E-20 | 25                               | 14228     | 0.37            | -0.029          | 0.028 | 3.06E-01 | 0.0                | 2.80E-04       |
| rs28441558 | 17:7803118      | T/C   | 0.94                       | 0.036 | 0.006 | 1.24E-10 | 17                               | 9835      | Excluded for MR |                 |       |          |                    |                |
| rs2901785  | 1:174104743     | G/A   | 0.55                       | 0.017 | 0.003 | 1.47E-11 | 25                               | 14228     | 0.54            | -0.002          | 0.027 | 9.49E-01 | 1.8                | 1.48E-04       |
| rs290601   | 8:115374642     | T/C   | 0.27                       | 0.016 | 0.003 | 1.14E-08 | 25                               | 14228     | 0.27            | -0.001          | 0.030 | 9.81E-01 | 3.8                | 1.06E-04       |
| rs2925128  | 14:98362355     | T/C   | 0.39                       | 0.017 | 0.003 | 3.67E-10 | 25                               | 14228     | 0.39            | -0.052          | 0.027 | 5.72E-02 | 3.8                | 1.34E-04       |
| rs2939756  | 11:41436297     | G/A   | 0.52                       | 0.016 | 0.003 | 7.45E-10 | 25                               | 14228     | 0.55            | -0.008          | 0.035 | 8.31E-01 | 32.6               | 1.23E-04       |
| rs3218116  | 6:41901763      | C/T   | 0.74                       | 0.020 | 0.003 | 1.05E-11 | 25                               | 14228     | 0.76            | 0.039           | 0.031 | 2.16E-01 | 0.0                | 1.50E-04       |
| rs329124   | 5:133865452     | A/G   | 0.57                       | 0.016 | 0.003 | 1.96E-10 | 25                               | 14228     | 0.57            | -0.021          | 0.027 | 4.30E-01 | 9.0                | 1.31E-04       |
| rs34342129 | 18:5872472      | T/C   | 0.49                       | 0.014 | 0.003 | 2.13E-08 | 25                               | 14228     | 0.50            | -0.021          | 0.027 | 4.45E-01 | 0.0                | 1.02E-04       |
| rs34399632 | 2:137571174     | G/A   | 0.23                       | 0.019 | 0.003 | 1.46E-10 | 25                               | 14228     | 0.18            | -0.068          | 0.035 | 5.22E-02 | 0.0                | 1.33E-04       |
| rs34553878 | 9:134334588     | G/A   | 0.11                       | 0.025 | 0.004 | 1.17E-09 | 17                               | 10167     | Excluded for MR |                 |       |          |                    |                |
| rs35375873 | 5:43190647      | G/C   | 0.89                       | 0.027 | 0.004 | 3.29E-11 | 17                               | 9835      | Excluded for MR |                 |       |          |                    |                |
| rs35656245 | 1:190957480     | A/G   | 0.28                       | 0.016 | 0.003 | 2.23E-08 | 25                               | 14228     | 0.29            | 0.008           | 0.029 | 7.89E-01 | 3.1                | 1.02E-04       |
| rs359247   | 2:60477052      | T/A   | 0.64                       | 0.022 | 0.003 | 9.89E-17 | 25                               | 14228     | 0.61            | -0.018          | 0.028 | 5.27E-01 | 15.3               | 2.24E-04       |
| rs3764351  | 17:37824339     | G/A   | 0.34                       | 0.015 | 0.003 | 3.89E-08 | 25                               | 14228     | 0.37            | -0.028          | 0.040 | 4.78E-01 | 36.3               | 9.80E-05       |
| rs3810496  | 20:62406886     | C/T   | 0.62                       | 0.016 | 0.003 | 1.54E-09 | 24                               | 14087     | 0.62            | -0.020          | 0.029 | 5.01E-01 | 4.8                | 1.19E-04       |
| rs3811038  | 2:113240183     | C/T   | 0.28                       | 0.019 | 0.003 | 1.58E-11 | 25                               | 14228     | 0.29            | -0.011          | 0.030 | 7.07E-01 | 7.1                | 1.47E-04       |
| rs3820277  | 1:18436657      | G/T   | 0.47                       | 0.019 | 0.003 | 1.57E-13 | 25                               | 14228     | 0.50            | -0.042          | 0.027 | 1.14E-01 | 11.8               | 1.77E-04       |

| SNP        | Chr:Pos(GRCh37) | EA/BA | Smoking initiation (GSCAN) |       |       |          | Parkinson's disease (Courage-PD) |           |                 |                 |       |          |                    |                |
|------------|-----------------|-------|----------------------------|-------|-------|----------|----------------------------------|-----------|-----------------|-----------------|-------|----------|--------------------|----------------|
|            |                 |       | EAF                        | Beta  | SE    | P-value  | N studies                        | N samples | EAF             | Beta            | SE    | P-value  | I <sup>2</sup> (%) | R <sup>2</sup> |
| rs3847244  | 9:3025368       | T/C   | 0.47                       | 0.019 | 0.003 | 2.60E-13 | 25                               | 14228     | 0.47            | -0.024          | 0.028 | 3.75E-01 | 0.0                | 1.74E-04       |
| rs3850736  | 8:64912021      | G/C   | 0.47                       | 0.019 | 0.003 | 6.43E-14 | 25                               | 14228     | 0.46            | Excluded for MR |       |          |                    |                |
| rs3934797  | 4:112467612     | G/A   | 0.82                       | 0.021 | 0.003 | 1.12E-10 | 25                               | 14228     | 0.83            | 0.006           | 0.036 | 8.66E-01 | 0.0                | 1.35E-04       |
| rs4044321  | 5:166989513     | A/G   | 0.36                       | 0.023 | 0.003 | 1.75E-17 | 25                               | 14228     | 0.37            | -0.018          | 0.028 | 5.36E-01 | 0.0                | 2.35E-04       |
| rs4140932  | 4:15458598      | T/A   | 0.57                       | 0.014 | 0.003 | 4.89E-08 | 25                               | 14228     | 0.57            | Excluded for MR |       |          |                    |                |
| rs42417    | 5:94198290      | T/C   | 0.69                       | 0.017 | 0.003 | 8.27E-10 | 25                               | 14228     | 0.70            | -0.042          | 0.043 | 3.31E-01 | 42.1               | 1.22E-04       |
| rs4264267  | 13:38359676     | T/C   | 0.53                       | 0.015 | 0.003 | 6.82E-09 | 25                               | 14228     | 0.52            | -0.001          | 0.027 | 9.63E-01 | 12.9               | 1.09E-04       |
| rs4310804  | 15:96858409     | C/G   | 0.75                       | 0.018 | 0.003 | 7.55E-10 | 22                               | 11576     | 0.77            | 0.013           | 0.038 | 7.22E-01 | 0.7                | 1.23E-04       |
| rs4326350  | 8:10763655      | C/G   | 0.51                       | 0.018 | 0.003 | 5.16E-12 | 25                               | 14228     | 0.53            | Excluded for MR |       |          |                    |                |
| rs4476253  | 18:25253297     | G/A   | 0.76                       | 0.018 | 0.003 | 5.78E-10 | 25                               | 14228     | 0.76            | -0.007          | 0.032 | 8.15E-01 | 10.9               | 1.25E-04       |
| rs45444697 | 1:155034632     | G/C   | 0.21                       | 0.020 | 0.003 | 2.72E-10 | 25                               | 14228     | 0.20            | -0.015          | 0.034 | 6.73E-01 | 0.0                | 1.30E-04       |
| rs4674993  | 2:226332033     | A/G   | 0.80                       | 0.024 | 0.003 | 4.85E-14 | 25                               | 14228     | 0.81            | 0.001           | 0.034 | 9.77E-01 | 0.0                | 1.84E-04       |
| rs4727189  | 7:88442568      | C/T   | 0.34                       | 0.015 | 0.003 | 3.00E-08 | 25                               | 14228     | 0.36            | 0.041           | 0.027 | 1.37E-01 | 0.0                | 9.97E-05       |
| rs4752018  | 10:118678712    | A/C   | 0.23                       | 0.019 | 0.003 | 4.42E-10 | 25                               | 14228     | 0.23            | 0.032           | 0.031 | 3.02E-01 | 20.7               | 1.26E-04       |
| rs4759229  | 12:56474480     | G/A   | 0.66                       | 0.016 | 0.003 | 6.53E-09 | 24                               | 14087     | 0.65            | 0.026           | 0.030 | 3.73E-01 | 0.0                | 1.09E-04       |
| rs4790874  | 17:1995177      | T/C   | 0.53                       | 0.017 | 0.003 | 8.43E-12 | 25                               | 14228     | 0.54            | -0.043          | 0.027 | 1.15E-01 | 0.0                | 1.52E-04       |
| rs4818005  | 21:40588819     | G/A   | 0.42                       | 0.020 | 0.003 | 1.09E-14 | 25                               | 14228     | 0.43            | -0.049          | 0.027 | 7.10E-02 | 0.0                | 2.03E-04       |
| rs4822102  | 22:42698430     | C/T   | 0.38                       | 0.017 | 0.003 | 2.78E-10 | 25                               | 14228     | 0.38            | 0.006           | 0.035 | 8.65E-01 | 28.0               | 1.29E-04       |
| rs4837631  | 9:122061948     | C/T   | 0.55                       | 0.015 | 0.003 | 2.03E-09 | 25                               | 14228     | 0.58            | 0.015           | 0.028 | 5.82E-01 | 0.0                | 1.17E-04       |
| rs4877285  | 9:81354129      | G/A   | 0.33                       | 0.018 | 0.003 | 2.10E-11 | 25                               | 14228     | 0.36            | -0.049          | 0.029 | 8.81E-02 | 0.0                | 1.46E-04       |
| rs4912332  | 1:58815243      | T/C   | 0.49                       | 0.014 | 0.003 | 2.94E-08 | 25                               | 14228     | 0.47            | -0.016          | 0.027 | 5.38E-01 | 14.1               | 9.97E-05       |
| rs540860   | 11:121530888    | G/A   | 0.54                       | 0.018 | 0.003 | 5.75E-12 | 25                               | 14228     | 0.52            | 0.024           | 0.027 | 3.66E-01 | 0.0                | 1.54E-04       |
| rs55786907 | 13:59871584     | G/A   | 0.16                       | 0.019 | 0.003 | 1.84E-08 | 25                               | 14228     | 0.17            | -0.031          | 0.036 | 3.88E-01 | 15.3               | 1.03E-04       |
| rs58400863 | 4:31184484      | G/A   | 0.65                       | 0.020 | 0.003 | 4.89E-14 | 25                               | 14228     | 0.64            | 0.004           | 0.028 | 8.93E-01 | 8.8                | 1.84E-04       |
| rs59537158 | 4:28246049      | T/C   | 0.21                       | 0.022 | 0.003 | 4.62E-13 | 25                               | 14228     | 0.20            | 0.010           | 0.034 | 7.79E-01 | 0.0                | 1.70E-04       |
| rs6073075  | 20:42015801     | T/A   | 0.18                       | 0.019 | 0.003 | 2.44E-08 | 25                               | 14228     | 0.19            | -0.004          | 0.035 | 9.15E-01 | 0.0                | 1.01E-04       |
| rs61533748 | 2:22582968      | C/T   | 0.38                       | 0.017 | 0.003 | 2.82E-11 | 25                               | 14228     | 0.37            | 0.019           | 0.028 | 4.86E-01 | 1.4                | 1.44E-04       |
| rs61886926 | 11:64133552     | C/T   | 0.62                       | 0.018 | 0.003 | 7.30E-12 | 25                               | 14228     | 0.64            | -0.011          | 0.037 | 7.70E-01 | 32.9               | 1.52E-04       |
| rs61959481 | 13:55834929     | G/A   | 0.79                       | 0.020 | 0.003 | 7.95E-11 | 25                               | 14228     | 0.79            | -0.024          | 0.033 | 4.63E-01 | 0.0                | 1.37E-04       |
| rs62007780 | 15:78025464     | G/T   | 0.58                       | 0.016 | 0.003 | 7.48E-10 | 25                               | 14228     | 0.59            | 0.016           | 0.027 | 5.59E-01 | 0.0                | 1.23E-04       |
| rs62193862 | 2:202843875     | A/G   | 0.10                       | 0.024 | 0.004 | 1.99E-08 | 14                               | 8264      | Excluded for MR |                 |       |          |                    |                |
| rs62246017 | 3:71483084      | G/A   | 0.68                       | 0.016 | 0.003 | 3.03E-09 | 24                               | 13788     | 0.67            | -0.061          | 0.031 | 4.62E-02 | 21.2               | 1.14E-04       |
| rs62340589 | 4:176875795     | C/G   | 0.20                       | 0.017 | 0.003 | 4.31E-08 | 25                               | 14228     | 0.20            | -0.062          | 0.034 | 6.78E-02 | 16.2               | 9.74E-05       |
| rs6265*    | 11:27679916     | C/T   | 0.81                       | 0.029 | 0.003 | 2.81E-19 | 25                               | 14228     | 0.80            | 0.002           | 0.033 | 9.43E-01 | 0.0                | 2.62E-04       |
| rs6437769  | 3:107997514     | T/C   | 0.58                       | 0.014 | 0.003 | 3.74E-08 | 24                               | 13788     | 0.59            | 0.010           | 0.028 | 7.11E-01 | 12.7               | 9.84E-05       |
| rs6438436  | 3:117822149     | T/C   | 0.82                       | 0.025 | 0.003 | 5.33E-14 | 24                               | 13788     | 0.82            | 0.041           | 0.036 | 2.55E-01 | 16.7               | 1.84E-04       |
| rs644740   | 11:65561468     | C/T   | 0.54                       | 0.014 | 0.003 | 3.67E-08 | 25                               | 14228     | 0.54            | 0.007           | 0.027 | 8.00E-01 | 0.0                | 9.84E-05       |
| rs6452785  | 5:87685500      | C/T   | 0.53                       | 0.027 | 0.003 | 4.69E-26 | 25                               | 14228     | 0.51            | -0.022          | 0.027 | 4.10E-01 | 0.0                | 3.60E-04       |
| rs6497840  | 16:25351633     | A/G   | 0.71                       | 0.023 | 0.003 | 2.01E-15 | 25                               | 14228     | 0.69            | -0.028          | 0.029 | 3.42E-01 | 9.8                | 2.15E-04       |

| SNP        | Chr:Pos(GRCh37) | EA/BA | Smoking initiation (GSCAN) |       |       |          | Parkinson's disease (Courage-PD) |           |      |                 |       |          |                    |                |
|------------|-----------------|-------|----------------------------|-------|-------|----------|----------------------------------|-----------|------|-----------------|-------|----------|--------------------|----------------|
|            |                 |       | EAF                        | Beta  | SE    | P-value  | N studies                        | N samples | EAF  | Beta            | SE    | P-value  | I <sup>2</sup> (%) | R <sup>2</sup> |
| rs6568832  | 6:97702876      | A/G   | 0.75                       | 0.019 | 0.003 | 1.74E-10 | 25                               | 14228     | 0.74 | 0.013           | 0.031 | 6.83E-01 | 10.1               | 1.32E-04       |
| rs67050670 | 18:39297254     | A/G   | 0.77                       | 0.020 | 0.003 | 2.34E-11 | 25                               | 14228     | 0.75 | 0.037           | 0.031 | 2.36E-01 | 1.9                | 1.45E-04       |
| rs6731872  | 2:624205        | G/T   | 0.83                       | 0.032 | 0.003 | 5.35E-21 | 25                               | 14228     | 0.80 | 0.005           | 0.034 | 8.95E-01 | 0.0                | 2.87E-04       |
| rs6750529  | 2:182027603     | T/C   | 0.74                       | 0.020 | 0.003 | 9.26E-12 | 25                               | 14228     | 0.75 | -0.033          | 0.031 | 2.81E-01 | 0.0                | 1.51E-04       |
| rs6756212  | 2:146140132     | C/T   | 0.47                       | 0.034 | 0.003 | 3.49E-40 | 25                               | 14228     | 0.46 | -0.034          | 0.027 | 2.01E-01 | 21.9               | 5.71E-04       |
| rs67777803 | 17:27323322     | G/T   | 0.83                       | 0.025 | 0.003 | 3.18E-13 | 25                               | 14228     | 0.84 | -0.025          | 0.036 | 4.87E-01 | 0.0                | 1.72E-04       |
| rs6874731  | 5:80263865      | G/T   | 0.48                       | 0.015 | 0.003 | 1.83E-09 | 25                               | 14228     | 0.47 | -0.006          | 0.043 | 8.81E-01 | 53.2               | 1.17E-04       |
| rs6890961  | 5:166778503     | C/T   | 0.38                       | 0.019 | 0.003 | 2.13E-13 | 25                               | 14228     | 0.41 | -0.054          | 0.029 | 6.05E-02 | 0.0                | 1.75E-04       |
| rs6936160  | 6:100347745     | T/C   | 0.70                       | 0.020 | 0.003 | 4.20E-13 | 25                               | 14228     | 0.69 | -0.006          | 0.029 | 8.49E-01 | 0.0                | 1.70E-04       |
| rs6948707  | 7:1870794       | G/T   | 0.42                       | 0.024 | 0.003 | 4.24E-21 | 25                               | 14228     | 0.41 | 0.014           | 0.037 | 7.18E-01 | 37.6               | 2.89E-04       |
| rs6986430  | 8:93048104      | T/C   | 0.78                       | 0.024 | 0.003 | 1.99E-15 | 25                               | 14228     | 0.77 | 0.029           | 0.031 | 3.47E-01 | 0.0                | 2.05E-04       |
| rs7024924  | 9:8282399       | C/T   | 0.17                       | 0.019 | 0.003 | 1.90E-08 | 25                               | 14228     | 0.17 | 0.000           | 0.035 | 9.94E-01 | 10.4               | 1.03E-04       |
| rs7072776  | 10:22032942     | A/G   | 0.29                       | 0.022 | 0.003 | 5.66E-15 | 24                               | 13416     | 0.33 | 0.011           | 0.030 | 7.11E-01 | 0.0                | 1.98E-04       |
| rs7134009  | 12:75263193     | T/C   | 0.71                       | 0.016 | 0.003 | 4.30E-08 | 25                               | 14228     | 0.70 | -0.020          | 0.029 | 4.81E-01 | 0.4                | 1.02E-04       |
| rs71367544 | 18:77574374     | T/C   | 0.20                       | 0.021 | 0.003 | 8.54E-11 | 25                               | 14228     | 0.17 | 0.014           | 0.035 | 7.00E-01 | 0.0                | 1.37E-04       |
| rs71592686 | 5:60121271      | C/T   | 0.27                       | 0.021 | 0.003 | 3.85E-13 | 25                               | 14228     | 0.27 | 0.018           | 0.030 | 5.37E-01 | 0.0                | 1.71E-04       |
| rs71602617 | 4:136406155     | C/T   | 0.78                       | 0.018 | 0.003 | 2.10E-08 | 25                               | 14228     | 0.79 | 0.030           | 0.033 | 3.64E-01 | 0.0                | 1.07E-04       |
| rs72780746 | 5:103929588     | T/C   | 0.83                       | 0.026 | 0.003 | 2.05E-14 | 25                               | 14228     | 0.81 | -0.021          | 0.034 | 5.42E-01 | 5.1                | 1.90E-04       |
| rs72836318 | 17:44121579     | T/C   | 0.75                       | 0.017 | 0.003 | 7.00E-09 | 25                               | 14228     | 0.75 | -0.090          | 0.032 | 4.56E-03 | 0.0                | 1.09E-04       |
| rs72938304 | 18:53661743     | G/A   | 0.89                       | 0.027 | 0.004 | 1.36E-11 | 25                               | 14228     | 0.88 | 0.028           | 0.042 | 5.06E-01 | 22.3               | 1.48E-04       |
| rs748832   | 3:16851202      | G/A   | 0.37                       | 0.017 | 0.003 | 6.60E-11 | 24                               | 13788     | 0.35 | 0.069           | 0.028 | 1.35E-02 | 0.9                | 1.38E-04       |
| rs75919030 | 17:50193197     | T/C   | 0.73                       | 0.021 | 0.003 | 3.35E-13 | 25                               | 14228     | 0.74 | -0.006          | 0.030 | 8.53E-01 | 11.7               | 1.72E-04       |
| rs7598402  | 2:50735943      | C/G   | 0.51                       | 0.015 | 0.003 | 7.38E-09 | 25                               | 14228     | 0.50 | Excluded for MR |       |          |                    |                |
| rs7631379  | 3:181409057     | C/T   | 0.21                       | 0.021 | 0.003 | 3.94E-11 | 25                               | 14228     | 0.19 | -0.020          | 0.050 | 6.83E-01 | 38.7               | 1.42E-04       |
| rs76608582 | 19:4474725      | C/A   | 0.95                       | 0.035 | 0.006 | 4.88E-09 | NA in Courage-PD                 |           |      |                 |       |          |                    |                |
| rs7696257  | 4:137474783     | A/G   | 0.37                       | 0.015 | 0.003 | 6.78E-09 | 25                               | 14228     | 0.36 | -0.007          | 0.028 | 8.09E-01 | 0.0                | 1.09E-04       |
| rs77215829 | 12:112618346    | A/C   | 0.87                       | 0.024 | 0.004 | 2.02E-10 | 19                               | 10031     | 0.87 | 0.044           | 0.051 | 3.83E-01 | 4.6                | 1.32E-04       |
| rs77283305 | 7:132593831     | G/A   | 0.69                       | 0.015 | 0.003 | 3.91E-08 | 25                               | 14228     | 0.70 | -0.035          | 0.037 | 3.44E-01 | 28.1               | 9.80E-05       |
| rs7743165  | 6:67521222      | G/T   | 0.50                       | 0.019 | 0.003 | 4.15E-14 | 25                               | 14228     | 0.47 | -0.049          | 0.027 | 7.22E-02 | 21.9               | 1.85E-04       |
| rs7809303  | 7:69484366      | G/A   | 0.68                       | 0.021 | 0.003 | 3.48E-15 | 25                               | 14228     | 0.70 | -0.030          | 0.029 | 2.90E-01 | 2.0                | 2.01E-04       |
| rs7836565  | 8:52569449      | C/T   | 0.28                       | 0.016 | 0.003 | 4.36E-08 | 25                               | 14228     | 0.29 | 0.064           | 0.030 | 3.41E-02 | 0.0                | 9.74E-05       |
| rs7920501  | 10:10043159     | T/A   | 0.54                       | 0.016 | 0.003 | 1.25E-09 | 25                               | 14228     | 0.53 | Excluded for MR |       |          |                    |                |
| rs7921378  | 10:63674885     | G/C   | 0.52                       | 0.023 | 0.003 | 6.10E-20 | 25                               | 14228     | 0.53 | Excluded for MR |       |          |                    |                |
| rs7929518  | 11:85980958     | G/A   | 0.77                       | 0.019 | 0.003 | 2.55E-10 | 25                               | 14228     | 0.77 | -0.080          | 0.041 | 5.01E-02 | 30.0               | 1.30E-04       |
| rs7943721  | 11:73309393     | G/A   | 0.17                       | 0.021 | 0.003 | 3.58E-10 | NA in Courage-PD                 |           |      |                 |       |          |                    |                |
| rs7969559  | 12:69655167     | A/G   | 0.29                       | 0.017 | 0.003 | 1.53E-09 | 25                               | 14228     | 0.33 | -0.013          | 0.039 | 7.34E-01 | 32.7               | 1.18E-04       |
| rs8005334  | 14:79563654     | G/T   | 0.36                       | 0.017 | 0.003 | 3.44E-10 | 25                               | 14228     | 0.34 | -0.014          | 0.028 | 6.17E-01 | 5.7                | 1.28E-04       |
| rs80054503 | 1:72900406      | T/C   | 0.88                       | 0.024 | 0.004 | 3.10E-09 | NA in Courage-PD                 |           |      |                 |       |          |                    |                |
| rs8096225  | 18:36921851     | C/A   | 0.70                       | 0.016 | 0.003 | 2.63E-08 | 25                               | 14228     | 0.69 | 0.003           | 0.029 | 9.27E-01 | 0.0                | 1.01E-04       |

| SNP                         | Chr:Pos(GRCh37) | EA/BA | Smoking initiation (GSCAN) |       |       |          | Parkinson's disease (Courage-PD) |           |                 |        |       |          |                    |                |
|-----------------------------|-----------------|-------|----------------------------|-------|-------|----------|----------------------------------|-----------|-----------------|--------|-------|----------|--------------------|----------------|
|                             |                 |       | EAF                        | Beta  | SE    | P-value  | N studies                        | N samples | EAF             | Beta   | SE    | P-value  | I <sup>2</sup> (%) | R <sup>2</sup> |
| rs876793                    | 1:237852083     | T/C   | 0.65                       | 0.018 | 0.003 | 5.69E-11 | 25                               | 14228     | 0.66            | 0.022  | 0.037 | 5.51E-01 | 28.7               | 1.46E-04       |
| rs9288999                   | 3:114147927     | A/G   | 0.74                       | 0.017 | 0.003 | 1.50E-09 | 24                               | 13788     | 0.73            | 0.003  | 0.031 | 9.31E-01 | 0.0                | 1.18E-04       |
| rs9302604                   | 16:69576894     | G/A   | 0.44                       | 0.019 | 0.003 | 3.29E-13 | 25                               | 14228     | 0.43            | -0.011 | 0.028 | 6.83E-01 | 0.0                | 1.72E-04       |
| rs9323328*                  | 14:58653514     | A/G   | 0.46                       | 0.014 | 0.003 | 2.55E-08 | 25                               | 14228     | 0.45            | -0.031 | 0.026 | 2.31E-01 | 0.0                | 1.01E-04       |
| rs9423279                   | 10:125680419    | C/G   | 0.36                       | 0.019 | 0.003 | 3.06E-12 | 1                                | 648       | Excluded for MR |        |       |          |                    |                |
| rs951740                    | 1:44011737      | A/G   | 0.62                       | 0.030 | 0.003 | 3.82E-29 | 25                               | 14228     | 0.61            | -0.030 | 0.028 | 2.79E-01 | 0.0                | 4.09E-04       |
| rs9540731*                  | 13:66949370     | C/T   | 0.49                       | 0.018 | 0.003 | 3.42E-12 | 25                               | 14228     | 0.50            | -0.035 | 0.030 | 2.42E-01 | 12.9               | 1.57E-04       |
| rs9545155                   | 13:80191873     | T/C   | 0.52                       | 0.016 | 0.003 | 3.04E-10 | 25                               | 14228     | 0.53            | 0.010  | 0.027 | 7.08E-01 | 0.0                | 1.29E-04       |
| rs9826984                   | 3:131945722     | G/A   | 0.46                       | 0.014 | 0.003 | 3.87E-08 | 24                               | 13788     | 0.44            | -0.011 | 0.028 | 6.91E-01 | 14.0               | 9.80E-05       |
| rs9922607                   | 16:17570220     | C/T   | 0.80                       | 0.022 | 0.003 | 3.42E-12 | 25                               | 14228     | 0.80            | -0.052 | 0.034 | 1.24E-01 | 15.9               | 1.57E-04       |
| rs9941217                   | 16:18050926     | C/G   | 0.65                       | 0.019 | 0.003 | 3.50E-12 | 25                               | 14228     | 0.67            | 0.009  | 0.029 | 7.51E-01 | 0.0                | 1.57E-04       |
| <b>VII: 1 or 2 residues</b> |                 |       |                            |       |       |          |                                  |           |                 |        |       |          |                    |                |
| rs1008078                   | 1:91189731      | T/C   | 0.40                       | 0.023 | 0.003 | 1.63E-18 | 25                               | 4500      | 0.42            | -0.056 | 0.048 | 2.44E-01 | 0.0                | 2.50E-04       |
| rs1022376                   | 2:22067213      | T/C   | 0.48                       | 0.015 | 0.003 | 1.66E-08 | 25                               | 4500      | 0.49            | 0.026  | 0.049 | 5.93E-01 | 15.3               | 1.09E-04       |
| rs10233018                  | 7:117523709     | G/A   | 0.52                       | 0.025 | 0.003 | 4.77E-22 | 24                               | 4475      | 0.50            | -0.007 | 0.047 | 8.81E-01 | 0.0                | 3.03E-04       |
| rs10279261                  | 7:133589846     | G/A   | 0.38                       | 0.019 | 0.003 | 6.05E-13 | 25                               | 4500      | 0.40            | -0.070 | 0.050 | 1.56E-01 | 0.0                | 1.68E-04       |
| rs1030015*                  | 7:78139581      | T/G   | 0.52                       | 0.014 | 0.003 | 2.15E-08 | 25                               | 4500      | 0.50            | 0.032  | 0.052 | 5.41E-01 | 12.0               | 1.02E-04       |
| rs10490159                  | 2:51341259      | T/C   | 0.39                       | 0.017 | 0.003 | 3.86E-11 | 24                               | 4475      | 0.38            | 0.064  | 0.049 | 1.91E-01 | 9.0                | 1.42E-04       |
| rs1050847                   | 16:87443734     | C/T   | 0.44                       | 0.015 | 0.003 | 7.37E-09 | 25                               | 4500      | 0.47            | -0.036 | 0.049 | 4.72E-01 | 0.0                | 1.08E-04       |
| rs10789369                  | 1:73824909      | A/G   | 0.38                       | 0.023 | 0.003 | 3.39E-19 | 25                               | 4500      | 0.42            | -0.054 | 0.049 | 2.70E-01 | 0.0                | 2.60E-04       |
| rs10853981                  | 19:4965064      | A/G   | 0.33                       | 0.015 | 0.003 | 4.88E-08 | 25                               | 4500      | 0.32            | 0.030  | 0.052 | 5.67E-01 | 17.9               | 9.67E-05       |
| rs10858334                  | 9:137989785     | G/C   | 0.14                       | 0.023 | 0.004 | 1.18E-09 | 25                               | 4500      | 0.13            | 0.017  | 0.072 | 8.17E-01 | 11.2               | 1.26E-04       |
| rs10885480                  | 10:115378364    | T/C   | 0.72                       | 0.019 | 0.003 | 3.83E-11 | 25                               | 4500      | 0.72            | -0.007 | 0.054 | 8.91E-01 | 2.3                | 1.42E-04       |
| rs10914684                  | 1:33795572      | G/A   | 0.68                       | 0.016 | 0.003 | 6.32E-09 | 25                               | 4500      | 0.67            | 0.074  | 0.052 | 1.52E-01 | 14.9               | 1.09E-04       |
| rs10945141                  | 6:69470709      | A/G   | 0.26                       | 0.018 | 0.003 | 3.59E-10 | 25                               | 4500      | 0.26            | 0.035  | 0.054 | 5.16E-01 | 9.9                | 1.28E-04       |
| rs10953957                  | 7:121954709     | A/G   | 0.39                       | 0.014 | 0.003 | 3.66E-08 | 25                               | 4500      | 0.39            | 0.029  | 0.049 | 5.49E-01 | 0.0                | 9.84E-05       |
| rs10966092                  | 9:23831658      | T/C   | 0.73                       | 0.020 | 0.003 | 1.12E-12 | 25                               | 4500      | 0.73            | -0.044 | 0.053 | 4.02E-01 | 0.0                | 1.64E-04       |
| rs11057005                  | 12:16748721     | A/G   | 0.56                       | 0.016 | 0.003 | 9.12E-10 | 25                               | 4500      | 0.59            | -0.097 | 0.050 | 5.35E-02 | 11.3               | 1.22E-04       |
| rs1106363                   | 11:131966264    | T/C   | 0.34                       | 0.017 | 0.003 | 9.20E-11 | 25                               | 4500      | 0.36            | -0.041 | 0.050 | 4.04E-01 | 0.0                | 1.36E-04       |
| rs11076962                  | 16:5811367      | C/T   | 0.28                       | 0.018 | 0.003 | 1.20E-10 | 25                               | 4500      | 0.28            | -0.065 | 0.054 | 2.28E-01 | 19.2               | 1.35E-04       |
| rs1108130                   | 13:100648356    | A/T   | 0.21                       | 0.024 | 0.003 | 1.57E-14 | 24                               | 4460      | 0.21            | 0.044  | 0.059 | 4.61E-01 | 0.0                | 1.92E-04       |
| rs1109480                   | 12:121083279    | G/A   | 0.62                       | 0.017 | 0.003 | 1.84E-10 | 25                               | 4500      | 0.62            | -0.042 | 0.050 | 4.04E-01 | 0.0                | 1.32E-04       |
| rs11128203                  | 3:71064431      | A/T   | 0.53                       | 0.020 | 0.003 | 1.29E-15 | 12                               | 2439      | Excluded for MR |        |       |          |                    |                |
| rs11162019                  | 1:87913176      | C/T   | 0.64                       | 0.015 | 0.003 | 5.06E-09 | 25                               | 4500      | 0.65            | 0.003  | 0.068 | 9.62E-01 | 33.4               | 1.11E-04       |
| rs1116690                   | 4:143510148     | G/A   | 0.74                       | 0.016 | 0.003 | 2.16E-08 | 23                               | 4435      | 0.72            | -0.015 | 0.057 | 7.90E-01 | 7.1                | 1.02E-04       |
| rs1126757*                  | 19:55879872     | T/C   | 0.47                       | 0.014 | 0.003 | 2.92E-08 | 25                               | 4496      | 0.47            | 0.006  | 0.047 | 8.97E-01 | 0.0                | 1.00E-04       |
| rs112725451                 | 4:68017710      | T/C   | 0.17                       | 0.026 | 0.003 | 1.65E-14 | 25                               | 4500      | 0.18            | -0.061 | 0.063 | 3.35E-01 | 1.6                | 1.91E-04       |
| rs113230003                 | 19:18460956     | G/A   | 0.74                       | 0.019 | 0.003 | 1.05E-10 | 25                               | 4500      | 0.77            | -0.049 | 0.058 | 3.99E-01 | 16.0               | 1.35E-04       |

| SNP         | Chr:Pos(GRCh37) | EA/BA | Smoking initiation (GSCAN) |       |       |          | Parkinson's disease (Courage-PD) |           |                 |                 |       |          |                    |                |
|-------------|-----------------|-------|----------------------------|-------|-------|----------|----------------------------------|-----------|-----------------|-----------------|-------|----------|--------------------|----------------|
|             |                 |       | EAF                        | Beta  | SE    | P-value  | N studies                        | N samples | EAF             | Beta            | SE    | P-value  | I <sup>2</sup> (%) | R <sup>2</sup> |
| rs1139897   | 16:720986       | G/A   | 0.77                       | 0.024 | 0.003 | 1.77E-15 | 24                               | 4422      | 0.77            | 0.033           | 0.059 | 5.72E-01 | 19.4               | 2.06E-04       |
| rs1150668   | 6:28129789      | T/G   | 0.58                       | 0.019 | 0.003 | 8.54E-13 | 25                               | 4500      | 0.62            | -0.050          | 0.050 | 3.21E-01 | 0.0                | 1.67E-04       |
| rs11594623  | 10:103960351    | C/T   | 0.23                       | 0.027 | 0.003 | 7.45E-20 | 25                               | 4500      | 0.22            | -0.009          | 0.057 | 8.71E-01 | 0.0                | 2.70E-04       |
| rs1160685   | 4:94052854      | G/C   | 0.45                       | 0.015 | 0.003 | 2.31E-09 | 25                               | 4500      | 0.47            | Excluded for MR |       |          |                    |                |
| rs11611651  | 12:133380790    | A/G   | 0.09                       | 0.027 | 0.005 | 2.05E-09 | 23                               | 4337      | 0.08            | -0.105          | 0.090 | 2.42E-01 | 0.0                | 1.17E-04       |
| rs11642231  | 16:89608702     | G/A   | 0.63                       | 0.016 | 0.003 | 3.44E-09 | 25                               | 4500      | 0.65            | 0.110           | 0.051 | 3.05E-02 | 22.8               | 1.13E-04       |
| rs11713899  | 3:2365026       | C/A   | 0.17                       | 0.019 | 0.003 | 3.15E-08 | 25                               | 4500      | 0.17            | 0.050           | 0.063 | 4.28E-01 | 0.0                | 9.93E-05       |
| rs6050446†  | 20:25195509     | G/C   | 0.95                       | 0.054 | 0.008 | 8.80E-13 | 17                               | 3882      | 0.97            | 0.094           | 0.167 | 5.72E-01 | 0.0                | 2.81E-04       |
| rs117657830 | 16:75766873     | A/G   | 0.96                       | 0.038 | 0.006 | 3.18E-09 | 24                               | 4460      | 0.96            | -0.132          | 0.126 | 2.96E-01 | 0.0                | 1.14E-04       |
| rs11768481  | 7:96629103      | C/A   | 0.66                       | 0.019 | 0.003 | 5.23E-12 | 7                                | 1949      | Excluded for MR |                 |       |          |                    |                |
| rs117734003 | 19:51129745     | C/G   | 0.07                       | 0.030 | 0.005 | 2.57E-09 | 17                               | 3623      | Excluded for MR |                 |       |          |                    |                |
| rs11783093  | 8:27425349      | C/T   | 0.84                       | 0.047 | 0.003 | 2.07E-41 | 25                               | 4500      | 0.83            | 0.022           | 0.064 | 7.29E-01 | 1.0                | 5.91E-04       |
| rs11791671  | 9:3398679       | T/C   | 0.07                       | 0.028 | 0.005 | 4.24E-08 | 25                               | 4500      | 0.07            | -0.045          | 0.100 | 6.55E-01 | 8.2                | 9.74E-05       |
| rs118202    | 6:111658371     | G/T   | 0.19                       | 0.037 | 0.003 | 1.90E-29 | 25                               | 4500      | 0.21            | -0.144          | 0.061 | 1.84E-02 | 0.0                | 4.12E-04       |
| rs1187820   | 3:173072584     | C/T   | 0.56                       | 0.014 | 0.003 | 2.69E-08 | 24                               | 4475      | 0.57            | -0.006          | 0.052 | 9.16E-01 | 0.0                | 1.00E-04       |
| rs12022778  | 1:50603995      | C/A   | 0.20                       | 0.027 | 0.003 | 3.18E-17 | 25                               | 4500      | 0.19            | 0.058           | 0.084 | 4.92E-01 | 35.3               | 2.32E-04       |
| rs12027999  | 1:154206358     | T/C   | 0.88                       | 0.024 | 0.004 | 5.33E-10 | 23                               | 4435      | 0.89            | -0.055          | 0.079 | 4.89E-01 | 8.3                | 1.25E-04       |
| rs12130857  | 1:7791461       | G/A   | 0.68                       | 0.018 | 0.003 | 3.65E-11 | 25                               | 4500      | 0.68            | -0.003          | 0.052 | 9.60E-01 | 0.0                | 1.42E-04       |
| rs12195240  | 6:98636905      | A/G   | 0.28                       | 0.025 | 0.003 | 1.08E-18 | 25                               | 4500      | 0.29            | -0.012          | 0.053 | 8.25E-01 | 5.7                | 2.53E-04       |
| rs12244388  | 10:104640052    | A/G   | 0.35                       | 0.026 | 0.003 | 4.31E-22 | 25                               | 4500      | 0.35            | -0.009          | 0.049 | 8.52E-01 | 9.6                | 3.03E-04       |
| rs12474587  | 2:162802993     | T/G   | 0.43                       | 0.024 | 0.003 | 4.83E-21 | 25                               | 4500      | 0.40            | 0.082           | 0.050 | 1.00E-01 | 0.0                | 2.88E-04       |
| rs12517438  | 5:30842054      | G/T   | 0.54                       | 0.015 | 0.003 | 1.89E-09 | 25                               | 4500      | 0.52            | 0.001           | 0.048 | 9.82E-01 | 0.0                | 1.17E-04       |
| rs12633090  | 3:83241365      | G/C   | 0.82                       | 0.023 | 0.003 | 3.16E-12 | 24                               | 4475      | 0.80            | 0.088           | 0.061 | 1.52E-01 | 0.0                | 1.58E-04       |
| rs12714017  | 2:80999398      | C/T   | 0.51                       | 0.015 | 0.003 | 3.65E-09 | 24                               | 4475      | 0.51            | -0.010          | 0.067 | 8.80E-01 | 37.1               | 1.18E-04       |
| rs12739243  | 1:210302043     | T/C   | 0.78                       | 0.021 | 0.003 | 4.45E-12 | 25                               | 4500      | 0.78            | 0.085           | 0.081 | 2.95E-01 | 37.3               | 1.56E-04       |
| rs12878369  | 14:28346502     | A/C   | 0.41                       | 0.017 | 0.003 | 1.60E-11 | 25                               | 4500      | 0.41            | 0.046           | 0.048 | 3.42E-01 | 0.5                | 1.48E-04       |
| rs12918191  | 16:50945156     | A/G   | 0.76                       | 0.020 | 0.003 | 3.14E-11 | 25                               | 4500      | 0.76            | -0.023          | 0.056 | 6.74E-01 | 0.0                | 1.43E-04       |
| rs1291821   | 10:11133823     | G/A   | 0.53                       | 0.014 | 0.003 | 1.39E-08 | 25                               | 4500      | 0.53            | 0.087           | 0.049 | 7.40E-02 | 0.0                | 1.05E-04       |
| rs13007361  | 2:166250244     | A/G   | 0.21                       | 0.018 | 0.003 | 2.29E-08 | 25                               | 4500      | 0.20            | 0.020           | 0.058 | 7.35E-01 | 0.0                | 1.01E-04       |
| rs13110073  | 4:147797913     | T/C   | 0.60                       | 0.025 | 0.003 | 3.24E-21 | 25                               | 4500      | 0.61            | -0.049          | 0.049 | 3.24E-01 | 2.8                | 2.90E-04       |
| rs13261666  | 8:59814666      | G/T   | 0.48                       | 0.020 | 0.003 | 4.36E-15 | 25                               | 4500      | 0.48            | 0.026           | 0.048 | 5.82E-01 | 0.8                | 2.00E-04       |
| rs13392222  | 2:100672408     | A/C   | 0.86                       | 0.023 | 0.004 | 1.93E-10 | 24                               | 4460      | 0.86            | 0.064           | 0.071 | 3.65E-01 | 12.4               | 1.31E-04       |
| rs13437771  | 7:99071478      | A/G   | 0.84                       | 0.027 | 0.004 | 1.39E-14 | 25                               | 4500      | 0.85            | -0.015          | 0.067 | 8.25E-01 | 0.0                | 1.93E-04       |
| rs1373178   | 18:49967811     | T/G   | 0.41                       | 0.020 | 0.003 | 4.16E-15 | 25                               | 4500      | 0.43            | -0.001          | 0.071 | 9.86E-01 | 39.3               | 2.00E-04       |
| rs1381287   | 14:98597552     | T/C   | 0.47                       | 0.018 | 0.003 | 1.81E-12 | 25                               | 4500      | 0.48            | -0.010          | 0.048 | 8.42E-01 | 9.0                | 1.62E-04       |
| rs1381775   | 11:42442826     | T/C   | 0.29                       | 0.016 | 0.003 | 2.79E-08 | 25                               | 4500      | 0.29            | 0.025           | 0.053 | 6.34E-01 | 0.0                | 1.00E-04       |
| rs1385108   | 5:154839646     | T/C   | 0.24                       | 0.019 | 0.003 | 3.84E-10 | 25                               | 4500      | 0.22            | 0.137           | 0.056 | 1.43E-02 | 0.0                | 1.27E-04       |
| rs13906     | 12:49952394     | C/T   | 0.89                       | 0.025 | 0.004 | 1.98E-09 | 25                               | 4500      | 0.88            | 0.041           | 0.075 | 5.84E-01 | 2.3                | 1.17E-04       |
| rs1435672   | 15:36399479     | C/T   | 0.56                       | 0.014 | 0.003 | 3.82E-08 | 25                               | 4500      | 0.54            | 0.029           | 0.048 | 5.53E-01 | 0.0                | 9.80E-05       |

| SNP         | Chr:Pos(GRCh37) | EA/BA | Smoking initiation (GSCAN) |       |       |          | Parkinson's disease (Courage-PD) |           |                 |                 |       |          |                    |                |  |
|-------------|-----------------|-------|----------------------------|-------|-------|----------|----------------------------------|-----------|-----------------|-----------------|-------|----------|--------------------|----------------|--|
|             |                 |       | EAF                        | Beta  | SE    | P-value  | N studies                        | N samples | EAF             | Beta            | SE    | P-value  | I <sup>2</sup> (%) | R <sup>2</sup> |  |
| rs1445649   | 2:155682556     | C/T   | 0.54                       | 0.021 | 0.003 | 8.48E-16 | 25                               | 4500      | 0.53            | -0.027          | 0.048 | 5.80E-01 | 0.0                | 2.10E-04       |  |
| rs1449012   | 3:159048333     | C/T   | 0.54                       | 0.015 | 0.003 | 1.77E-09 | 25                               | 4500      | 0.55            | -0.056          | 0.049 | 2.49E-01 | 0.0                | 1.18E-04       |  |
| rs147052174 | 1:179783167     | T/G   | 0.02                       | 0.062 | 0.010 | 2.30E-10 | 13                               | 2627      | Excluded for MR |                 |       |          |                    |                |  |
| rs1514176   | 1:74991596      | G/A   | 0.42                       | 0.019 | 0.003 | 7.67E-14 | 25                               | 4500      | 0.43            | -0.004          | 0.048 | 9.34E-01 | 0.0                | 1.81E-04       |  |
| rs1549979   | 3:85460131      | C/T   | 0.38                       | 0.025 | 0.003 | 8.80E-21 | 25                               | 4500      | 0.40            | -0.114          | 0.048 | 1.80E-02 | 0.0                | 2.85E-04       |  |
| rs160631    | 6:52895230      | T/G   | 0.27                       | 0.017 | 0.003 | 1.87E-09 | 25                               | 4500      | 0.28            | 0.033           | 0.054 | 5.46E-01 | 0.0                | 1.17E-04       |  |
| rs16826827  | 2:147825689     | T/C   | 0.88                       | 0.022 | 0.004 | 9.17E-09 | 25                               | 4500      | 0.88            | -0.066          | 0.075 | 3.81E-01 | 0.0                | 1.07E-04       |  |
| rs1713676*  | 11:113660576    | A/G   | 0.48                       | 0.017 | 0.003 | 5.38E-11 | 25                               | 4500      | 0.48            | 0.023           | 0.047 | 6.22E-01 | 0.0                | 1.40E-04       |  |
| rs1714521   | 3:158284861     | A/C   | 0.59                       | 0.016 | 0.003 | 3.07E-10 | 25                               | 4500      | 0.60            | 0.008           | 0.048 | 8.65E-01 | 4.5                | 1.29E-04       |  |
| rs17197663  | 13:38172867     | G/A   | 0.88                       | 0.022 | 0.004 | 2.06E-08 | 25                               | 4500      | 0.88            | 0.010           | 0.073 | 8.95E-01 | 0.0                | 1.02E-04       |  |
| rs17229285  | 2:199523122     | C/T   | 0.50                       | 0.015 | 0.003 | 1.27E-09 | 25                               | 4500      | 0.51            | 0.025           | 0.048 | 5.98E-01 | 0.0                | 1.20E-04       |  |
| rs1733760   | 10:56698174     | C/T   | 0.51                       | 0.015 | 0.003 | 6.70E-09 | 25                               | 4500      | 0.51            | 0.024           | 0.062 | 7.01E-01 | 25.4               | 1.09E-04       |  |
| rs1737329   | 6:163807748     | G/C   | 0.74                       | 0.017 | 0.003 | 5.08E-09 | 25                               | 4500      | 0.73            | 0.011           | 0.056 | 8.41E-01 | 0.4                | 1.11E-04       |  |
| rs17554906  | 6:92226609      | C/G   | 0.44                       | 0.014 | 0.003 | 3.14E-08 | 25                               | 4500      | 0.43            | Excluded for MR |       |          |                    |                |  |
| rs1772572   | 13:81191176     | C/A   | 0.68                       | 0.017 | 0.003 | 5.62E-10 | 25                               | 4500      | 0.68            | -0.030          | 0.051 | 5.57E-01 | 0.0                | 1.25E-04       |  |
| rs1811739   | 14:77529375     | A/G   | 0.25                       | 0.018 | 0.003 | 5.97E-10 | 25                               | 4500      | 0.24            | 0.093           | 0.056 | 9.74E-02 | 22.0               | 1.25E-04       |  |
| rs1889571   | 1:32195819      | G/T   | 0.13                       | 0.022 | 0.004 | 4.19E-09 | 25                               | 4500      | 0.12            | 0.029           | 0.072 | 6.92E-01 | 10.3               | 1.12E-04       |  |
| rs1901477   | 2:104126983     | G/A   | 0.51                       | 0.030 | 0.003 | 2.07E-31 | 25                               | 4500      | 0.51            | 0.032           | 0.048 | 5.06E-01 | 1.1                | 4.63E-04       |  |
| rs2010921   | 11:132098205    | A/G   | 0.31                       | 0.017 | 0.003 | 2.47E-10 | 25                               | 4500      | 0.30            | 0.093           | 0.053 | 7.94E-02 | 0.0                | 1.30E-04       |  |
| rs2063976   | 8:91096366      | C/T   | 0.34                       | 0.020 | 0.003 | 7.45E-14 | 25                               | 4500      | 0.34            | 0.008           | 0.051 | 8.79E-01 | 12.6               | 1.81E-04       |  |
| rs2155646   | 11:112912811    | C/T   | 0.40                       | 0.038 | 0.003 | 9.44E-48 | 25                               | 4500      | 0.39            | 0.039           | 0.048 | 4.23E-01 | 0.0                | 6.85E-04       |  |
| rs2173019   | 5:167614971     | A/T   | 0.18                       | 0.028 | 0.003 | 2.98E-17 | 25                               | 4500      | 0.16            | 0.115           | 0.064 | 7.17E-02 | 0.0                | 2.32E-04       |  |
| rs221988    | 3:64234307      | A/C   | 0.62                       | 0.015 | 0.003 | 1.43E-08 | 25                               | 4500      | 0.63            | -0.020          | 0.050 | 6.90E-01 | 0.0                | 1.05E-04       |  |
| rs2279829   | 3:147106319     | C/T   | 0.78                       | 0.017 | 0.003 | 2.05E-08 | 25                               | 4500      | 0.79            | -0.076          | 0.059 | 2.00E-01 | 10.1               | 1.02E-04       |  |
| rs2289791   | 15:67476952     | G/T   | 0.75                       | 0.018 | 0.003 | 2.01E-09 | 12                               | 2439      | Excluded for MR |                 |       |          |                    |                |  |
| rs2319545   | 3:147719648     | A/C   | 0.15                       | 0.023 | 0.004 | 8.30E-11 | 25                               | 4500      | 0.13            | 0.013           | 0.071 | 8.52E-01 | 0.0                | 1.37E-04       |  |
| rs2378662   | 9:86707289      | A/G   | 0.54                       | 0.015 | 0.003 | 2.67E-09 | 25                               | 4500      | 0.53            | 0.049           | 0.049 | 3.17E-01 | 0.0                | 1.15E-04       |  |
| rs2526390   | 3:50192760      | T/C   | 0.33                       | 0.020 | 0.003 | 3.62E-14 | 25                               | 4500      | 0.33            | -0.006          | 0.050 | 8.99E-01 | 0.0                | 1.86E-04       |  |
| rs2587507*  | 17:77790135     | T/C   | 0.50                       | 0.015 | 0.003 | 8.69E-09 | 24                               | 4458      | 0.51            | -0.044          | 0.060 | 4.62E-01 | 28.0               | 1.07E-04       |  |
| rs2710634   | 2:32808804      | T/C   | 0.48                       | 0.018 | 0.003 | 3.36E-12 | 25                               | 4500      | 0.51            | -0.109          | 0.049 | 2.56E-02 | 2.5                | 1.57E-04       |  |
| rs2796793   | 10:36634124     | A/G   | 0.45                       | 0.014 | 0.003 | 1.55E-08 | 24                               | 4278      | 0.44            | 0.018           | 0.049 | 7.15E-01 | 0.0                | 1.04E-04       |  |
| rs281296    | 15:47685010     | A/G   | 0.36                       | 0.025 | 0.003 | 1.59E-20 | 25                               | 4500      | 0.37            | -0.080          | 0.050 | 1.10E-01 | 0.8                | 2.80E-04       |  |
| rs28441558  | 17:7803118      | T/C   | 0.94                       | 0.036 | 0.006 | 1.24E-10 | 16                               | 3555      | Excluded for MR |                 |       |          |                    |                |  |
| rs2901785   | 1:174104743     | G/A   | 0.55                       | 0.017 | 0.003 | 1.47E-11 | 25                               | 4500      | 0.54            | 0.072           | 0.049 | 1.36E-01 | 6.5                | 1.48E-04       |  |
| rs290601    | 8:115374642     | T/C   | 0.27                       | 0.016 | 0.003 | 1.14E-08 | 25                               | 4500      | 0.27            | -0.032          | 0.072 | 6.55E-01 | 33.8               | 1.06E-04       |  |
| rs2925128   | 14:98362355     | T/C   | 0.39                       | 0.017 | 0.003 | 3.67E-10 | 25                               | 4500      | 0.37            | 0.133           | 0.063 | 3.47E-02 | 26.3               | 1.34E-04       |  |
| rs2939756   | 11:41436297     | G/A   | 0.52                       | 0.016 | 0.003 | 7.45E-10 | 24                               | 4475      | 0.54            | 0.018           | 0.048 | 7.05E-01 | 0.0                | 1.23E-04       |  |
| rs3218116   | 6:41901763      | C/T   | 0.74                       | 0.020 | 0.003 | 1.05E-11 | 25                               | 4500      | 0.77            | -0.075          | 0.056 | 1.84E-01 | 0.0                | 1.50E-04       |  |
| rs329124    | 5:133865452     | A/G   | 0.57                       | 0.016 | 0.003 | 1.96E-10 | 25                               | 4500      | 0.58            | -0.103          | 0.048 | 3.22E-02 | 0.0                | 1.31E-04       |  |



| SNP        | Chr:Pos(GRCh37) | EA/BA | Smoking initiation (GSCAN) |       |       |          | Parkinson's disease (Courage-PD) |           |                 |                 |       |          |                    |                |  |
|------------|-----------------|-------|----------------------------|-------|-------|----------|----------------------------------|-----------|-----------------|-----------------|-------|----------|--------------------|----------------|--|
|            |                 |       | EAF                        | Beta  | SE    | P-value  | N studies                        | N samples | EAF             | Beta            | SE    | P-value  | I <sup>2</sup> (%) | R <sup>2</sup> |  |
| rs34342129 | 18:5872472      | T/C   | 0.49                       | 0.014 | 0.003 | 2.13E-08 | 25                               | 4500      | 0.51            | -0.044          | 0.049 | 3.75E-01 | 4.1                | 1.02E-04       |  |
| rs34399632 | 2:137571174     | G/A   | 0.23                       | 0.019 | 0.003 | 1.46E-10 | 25                               | 4500      | 0.20            | 0.063           | 0.077 | 4.13E-01 | 25.4               | 1.33E-04       |  |
| rs34553878 | 9:134334588     | G/A   | 0.11                       | 0.025 | 0.004 | 1.17E-09 | 17                               | 3715      | Excluded for MR |                 |       |          |                    |                |  |
| rs35375873 | 5:43190647      | G/C   | 0.89                       | 0.027 | 0.004 | 3.29E-11 | 17                               | 3623      | Excluded for MR |                 |       |          |                    |                |  |
| rs35656245 | 1:190957480     | A/G   | 0.28                       | 0.016 | 0.003 | 2.23E-08 | 25                               | 4500      | 0.29            | 0.085           | 0.052 | 1.05E-01 | 0.0                | 1.02E-04       |  |
| rs359247   | 2:60477052      | T/A   | 0.64                       | 0.022 | 0.003 | 9.89E-17 | 25                               | 4500      | 0.61            | -0.018          | 0.049 | 7.09E-01 | 0.0                | 2.24E-04       |  |
| rs3764351  | 17:37824339     | G/A   | 0.34                       | 0.015 | 0.003 | 3.89E-08 | 24                               | 4432      | 0.35            | 0.063           | 0.051 | 2.18E-01 | 0.0                | 9.80E-05       |  |
| rs3810496  | 20:62406886     | C/T   | 0.62                       | 0.016 | 0.003 | 1.54E-09 | 24                               | 4475      | 0.60            | 0.066           | 0.051 | 1.97E-01 | 0.7                | 1.19E-04       |  |
| rs3811038  | 2:113240183     | C/T   | 0.28                       | 0.019 | 0.003 | 1.58E-11 | 25                               | 4500      | 0.28            | -0.023          | 0.074 | 7.62E-01 | 35.2               | 1.47E-04       |  |
| rs3820277  | 1:18436657      | G/T   | 0.47                       | 0.019 | 0.003 | 1.57E-13 | 25                               | 4500      | 0.50            | -0.062          | 0.048 | 1.90E-01 | 0.0                | 1.77E-04       |  |
| rs3847244  | 9:3025368       | T/C   | 0.47                       | 0.019 | 0.003 | 2.60E-13 | 25                               | 4500      | 0.47            | -0.011          | 0.049 | 8.19E-01 | 0.0                | 1.74E-04       |  |
| rs3850736  | 8:64912021      | G/C   | 0.47                       | 0.019 | 0.003 | 6.43E-14 | 25                               | 4500      | 0.47            | Excluded for MR |       |          |                    |                |  |
| rs3934797  | 4:112467612     | G/A   | 0.82                       | 0.021 | 0.003 | 1.12E-10 | 25                               | 4500      | 0.82            | 0.031           | 0.065 | 6.35E-01 | 1.1                | 1.35E-04       |  |
| rs4044321  | 5:166989513     | A/G   | 0.36                       | 0.023 | 0.003 | 1.75E-17 | 24                               | 4475      | 0.37            | -0.023          | 0.051 | 6.58E-01 | 0.0                | 2.35E-04       |  |
| rs4140932  | 4:15458598      | T/A   | 0.57                       | 0.014 | 0.003 | 4.89E-08 | 25                               | 4500      | 0.58            | Excluded for MR |       |          |                    |                |  |
| rs42417    | 5:94198290      | T/C   | 0.69                       | 0.017 | 0.003 | 8.27E-10 | 25                               | 4500      | 0.69            | -0.034          | 0.053 | 5.25E-01 | 0.0                | 1.22E-04       |  |
| rs4264267  | 13:38359676     | T/C   | 0.53                       | 0.015 | 0.003 | 6.82E-09 | 25                               | 4500      | 0.54            | -0.014          | 0.049 | 7.74E-01 | 0.0                | 1.09E-04       |  |
| rs4310804  | 15:96858409     | C/G   | 0.75                       | 0.018 | 0.003 | 7.55E-10 | 22                               | 4008      | 0.76            | 0.148           | 0.064 | 2.13E-02 | 0.0                | 1.23E-04       |  |
| rs4326350  | 8:10763655      | C/G   | 0.51                       | 0.018 | 0.003 | 5.16E-12 | 25                               | 4500      | 0.53            | Excluded for MR |       |          |                    |                |  |
| rs4476253  | 18:25253297     | G/A   | 0.76                       | 0.018 | 0.003 | 5.78E-10 | 25                               | 4500      | 0.77            | -0.016          | 0.057 | 7.78E-01 | 0.0                | 1.25E-04       |  |
| rs45444697 | 1:155034632     | G/C   | 0.21                       | 0.020 | 0.003 | 2.72E-10 | 25                               | 4500      | 0.20            | -0.018          | 0.060 | 7.67E-01 | 0.0                | 1.30E-04       |  |
| rs4674993  | 2:226332033     | A/G   | 0.80                       | 0.024 | 0.003 | 4.85E-14 | 25                               | 4500      | 0.81            | 0.065           | 0.061 | 2.91E-01 | 0.0                | 1.84E-04       |  |
| rs4727189  | 7:88442568      | C/T   | 0.34                       | 0.015 | 0.003 | 3.00E-08 | 25                               | 4500      | 0.34            | 0.069           | 0.050 | 1.63E-01 | 0.0                | 9.97E-05       |  |
| rs4752018  | 10:118678712    | A/C   | 0.23                       | 0.019 | 0.003 | 4.42E-10 | 25                               | 4500      | 0.23            | 0.006           | 0.057 | 9.11E-01 | 4.0                | 1.26E-04       |  |
| rs4759229  | 12:56474480     | G/A   | 0.66                       | 0.016 | 0.003 | 6.53E-09 | 24                               | 4475      | 0.65            | -0.035          | 0.052 | 5.03E-01 | 6.9                | 1.09E-04       |  |
| rs4790874  | 17:1995177      | T/C   | 0.53                       | 0.017 | 0.003 | 8.43E-12 | 24                               | 4432      | 0.52            | 0.069           | 0.049 | 1.60E-01 | 2.1                | 1.52E-04       |  |
| rs4818005  | 21:40588819     | G/A   | 0.42                       | 0.020 | 0.003 | 1.09E-14 | 24                               | 4475      | 0.43            | -0.029          | 0.048 | 5.41E-01 | 0.0                | 2.03E-04       |  |
| rs4822102  | 22:42698430     | C/T   | 0.38                       | 0.017 | 0.003 | 2.78E-10 | 24                               | 4475      | 0.38            | 0.077           | 0.049 | 1.18E-01 | 14.6               | 1.29E-04       |  |
| rs4837631  | 9:122061948     | C/T   | 0.55                       | 0.015 | 0.003 | 2.03E-09 | 24                               | 4475      | 0.56            | 0.058           | 0.049 | 2.36E-01 | 20.1               | 1.17E-04       |  |
| rs4877285  | 9:81354129      | G/A   | 0.33                       | 0.018 | 0.003 | 2.10E-11 | 25                               | 4500      | 0.36            | -0.074          | 0.067 | 2.68E-01 | 28.5               | 1.46E-04       |  |
| rs4912332  | 1:58815243      | T/C   | 0.49                       | 0.014 | 0.003 | 2.94E-08 | 25                               | 4500      | 0.47            | 0.095           | 0.048 | 4.97E-02 | 0.0                | 9.97E-05       |  |
| rs540860   | 11:121530888    | G/A   | 0.54                       | 0.018 | 0.003 | 5.75E-12 | 25                               | 4500      | 0.52            | 0.052           | 0.048 | 2.81E-01 | 0.0                | 1.54E-04       |  |
| rs55786907 | 13:59871584     | G/A   | 0.16                       | 0.019 | 0.003 | 1.84E-08 | 25                               | 4500      | 0.16            | -0.026          | 0.065 | 6.85E-01 | 0.0                | 1.03E-04       |  |
| rs58400863 | 4:31184484      | G/A   | 0.65                       | 0.020 | 0.003 | 4.89E-14 | 25                               | 4500      | 0.64            | 0.021           | 0.050 | 6.83E-01 | 0.0                | 1.84E-04       |  |
| rs59537158 | 4:28246049      | T/C   | 0.21                       | 0.022 | 0.003 | 4.62E-13 | 25                               | 4500      | 0.22            | -0.097          | 0.060 | 1.07E-01 | 0.0                | 1.70E-04       |  |
| rs6073075  | 20:42015801     | T/A   | 0.18                       | 0.019 | 0.003 | 2.44E-08 | 25                               | 4500      | 0.18            | -0.008          | 0.064 | 8.96E-01 | 0.0                | 1.01E-04       |  |
| rs61533748 | 2:22582968      | C/T   | 0.38                       | 0.017 | 0.003 | 2.82E-11 | 24                               | 4475      | 0.38            | -0.012          | 0.050 | 8.04E-01 | 18.6               | 1.44E-04       |  |
| rs61886926 | 11:64133552     | C/T   | 0.62                       | 0.018 | 0.003 | 7.30E-12 | 25                               | 4500      | 0.63            | -0.037          | 0.049 | 4.54E-01 | 0.0                | 1.52E-04       |  |
| rs61959481 | 13:55834929     | G/A   | 0.79                       | 0.020 | 0.003 | 7.95E-11 | 25                               | 4500      | 0.78            | 0.073           | 0.079 | 3.61E-01 | 33.8               | 1.37E-04       |  |

| SNP        | Chr:Pos(GRCh37) | EA/BA | Smoking initiation (GSCAN) |       |       |          | Parkinson's disease (Courage-PD) |           |                 |                 |       |          |                    |                |  |
|------------|-----------------|-------|----------------------------|-------|-------|----------|----------------------------------|-----------|-----------------|-----------------|-------|----------|--------------------|----------------|--|
|            |                 |       | EAF                        | Beta  | SE    | P-value  | N studies                        | N samples | EAF             | Beta            | SE    | P-value  | I <sup>2</sup> (%) | R <sup>2</sup> |  |
| rs62007780 | 15:78025464     | G/T   | 0.58                       | 0.016 | 0.003 | 7.48E-10 | 25                               | 4500      | 0.61            | -0.098          | 0.067 | 1.43E-01 | 33.7               | 1.23E-04       |  |
| rs62193862 | 2:202843875     | A/G   | 0.10                       | 0.024 | 0.004 | 1.99E-08 | 14                               | 3176      | Excluded for MR |                 |       |          |                    |                |  |
| rs62246017 | 3:71483084      | G/A   | 0.68                       | 0.016 | 0.003 | 3.03E-09 | 25                               | 4500      | 0.69            | -0.081          | 0.054 | 1.33E-01 | 16.7               | 1.14E-04       |  |
| rs62340589 | 4:176875795     | C/G   | 0.20                       | 0.017 | 0.003 | 4.31E-08 | 25                               | 4500      | 0.20            | -0.008          | 0.061 | 9.00E-01 | 0.0                | 9.74E-05       |  |
| rs6265*    | 11:27679916     | C/T   | 0.81                       | 0.029 | 0.003 | 2.81E-19 | 25                               | 4500      | 0.81            | 0.004           | 0.066 | 9.48E-01 | 9.1                | 2.62E-04       |  |
| rs6437769  | 3:107997514     | T/C   | 0.58                       | 0.014 | 0.003 | 3.74E-08 | 25                               | 4500      | 0.59            | -0.083          | 0.049 | 9.02E-02 | 0.0                | 9.84E-05       |  |
| rs6438436  | 3:117822149     | T/C   | 0.82                       | 0.025 | 0.003 | 5.33E-14 | 25                               | 4500      | 0.81            | 0.067           | 0.063 | 2.89E-01 | 0.0                | 1.84E-04       |  |
| rs644740   | 11:65561468     | C/T   | 0.54                       | 0.014 | 0.003 | 3.67E-08 | 25                               | 4500      | 0.54            | 0.050           | 0.047 | 2.91E-01 | 0.0                | 9.84E-05       |  |
| rs6452785  | 5:87685500      | C/T   | 0.53                       | 0.027 | 0.003 | 4.69E-26 | 25                               | 4500      | 0.52            | 0.001           | 0.049 | 9.80E-01 | 0.0                | 3.60E-04       |  |
| rs6497840  | 16:25351633     | A/G   | 0.71                       | 0.023 | 0.003 | 2.01E-15 | 25                               | 4500      | 0.69            | -0.025          | 0.053 | 6.34E-01 | 19.4               | 2.15E-04       |  |
| rs6568832  | 6:97702876      | A/G   | 0.75                       | 0.019 | 0.003 | 1.74E-10 | 25                               | 4500      | 0.74            | -0.033          | 0.055 | 5.55E-01 | 12.7               | 1.32E-04       |  |
| rs67050670 | 18:39297254     | A/G   | 0.77                       | 0.020 | 0.003 | 2.34E-11 | 25                               | 4500      | 0.74            | 0.146           | 0.055 | 8.02E-03 | 15.3               | 1.45E-04       |  |
| rs6731872  | 2:624205        | G/T   | 0.83                       | 0.032 | 0.003 | 5.35E-21 | 25                               | 4500      | 0.81            | 0.010           | 0.092 | 9.17E-01 | 40.1               | 2.87E-04       |  |
| rs6750529  | 2:182027603     | T/C   | 0.74                       | 0.020 | 0.003 | 9.26E-12 | 24                               | 4475      | 0.76            | 0.026           | 0.056 | 6.40E-01 | 0.0                | 1.51E-04       |  |
| rs6756212  | 2:146140132     | C/T   | 0.47                       | 0.034 | 0.003 | 3.49E-40 | 25                               | 4500      | 0.46            | 0.048           | 0.048 | 3.24E-01 | 0.0                | 5.71E-04       |  |
| rs67777803 | 17:27323322     | G/T   | 0.83                       | 0.025 | 0.003 | 3.18E-13 | 24                               | 4432      | 0.83            | 0.052           | 0.065 | 4.18E-01 | 2.1                | 1.72E-04       |  |
| rs6874731  | 5:80263865      | G/T   | 0.48                       | 0.015 | 0.003 | 1.83E-09 | 25                               | 4500      | 0.48            | -0.003          | 0.047 | 9.48E-01 | 0.0                | 1.17E-04       |  |
| rs6890961  | 5:166778503     | C/T   | 0.38                       | 0.019 | 0.003 | 2.13E-13 | 25                               | 4500      | 0.40            | -0.014          | 0.068 | 8.37E-01 | 31.9               | 1.75E-04       |  |
| rs6936160  | 6:100347745     | T/C   | 0.70                       | 0.020 | 0.003 | 4.20E-13 | 25                               | 4500      | 0.68            | 0.052           | 0.053 | 3.29E-01 | 23.6               | 1.70E-04       |  |
| rs6948707  | 7:1870794       | G/T   | 0.42                       | 0.024 | 0.003 | 4.24E-21 | 25                               | 4500      | 0.40            | 0.043           | 0.048 | 3.71E-01 | 0.0                | 2.89E-04       |  |
| rs6986430  | 8:93048104      | T/C   | 0.78                       | 0.024 | 0.003 | 1.99E-15 | 25                               | 4500      | 0.76            | 0.164           | 0.074 | 2.62E-02 | 29.0               | 2.05E-04       |  |
| rs7024924  | 9:8282399       | C/T   | 0.17                       | 0.019 | 0.003 | 1.90E-08 | 24                               | 4475      | 0.16            | 0.020           | 0.064 | 7.58E-01 | 0.0                | 1.03E-04       |  |
| rs7072776  | 10:22032942     | A/G   | 0.29                       | 0.022 | 0.003 | 5.66E-15 | 24                               | 4278      | 0.33            | -0.060          | 0.071 | 3.94E-01 | 27.9               | 1.98E-04       |  |
| rs7134009  | 12:75263193     | T/C   | 0.71                       | 0.016 | 0.003 | 4.30E-08 | 25                               | 4500      | 0.71            | 0.032           | 0.053 | 5.48E-01 | 18.5               | 1.02E-04       |  |
| rs71367544 | 18:77574374     | T/C   | 0.20                       | 0.021 | 0.003 | 8.54E-11 | 25                               | 4500      | 0.18            | 0.095           | 0.063 | 1.31E-01 | 20.8               | 1.37E-04       |  |
| rs71592686 | 5:60121271      | C/T   | 0.27                       | 0.021 | 0.003 | 3.85E-13 | 25                               | 4500      | 0.26            | 0.030           | 0.053 | 5.71E-01 | 0.0                | 1.71E-04       |  |
| rs71602617 | 4:136406155     | C/T   | 0.78                       | 0.018 | 0.003 | 2.10E-08 | 25                               | 4500      | 0.79            | -0.018          | 0.059 | 7.57E-01 | 10.3               | 1.07E-04       |  |
| rs72780746 | 5:103929588     | T/C   | 0.83                       | 0.026 | 0.003 | 2.05E-14 | 25                               | 4500      | 0.82            | 0.002           | 0.063 | 9.68E-01 | 19.9               | 1.90E-04       |  |
| rs72836318 | 17:44121579     | T/C   | 0.75                       | 0.017 | 0.003 | 7.00E-09 | 24                               | 4432      | 0.76            | -0.087          | 0.057 | 1.29E-01 | 15.2               | 1.09E-04       |  |
| rs72938304 | 18:53661743     | G/A   | 0.89                       | 0.027 | 0.004 | 1.36E-11 | 25                               | 4500      | 0.89            | -0.001          | 0.077 | 9.95E-01 | 0.0                | 1.48E-04       |  |
| rs748832   | 3:16851202      | G/A   | 0.37                       | 0.017 | 0.003 | 6.60E-11 | 25                               | 4500      | 0.36            | 0.017           | 0.049 | 7.28E-01 | 0.0                | 1.38E-04       |  |
| rs75919030 | 17:50193197     | T/C   | 0.73                       | 0.021 | 0.003 | 3.35E-13 | 24                               | 4432      | 0.73            | 0.041           | 0.055 | 4.56E-01 | 0.0                | 1.72E-04       |  |
| rs7598402  | 2:50735943      | C/G   | 0.51                       | 0.015 | 0.003 | 7.38E-09 | 25                               | 4500      | 0.51            | Excluded for MR |       |          |                    |                |  |
| rs7631379  | 3:181409057     | C/T   | 0.21                       | 0.021 | 0.003 | 3.94E-11 | 24                               | 4475      | 0.21            | -0.158          | 0.087 | 7.02E-02 | 35.3               | 1.42E-04       |  |
| rs76608582 | 19:4474725      | C/A   | 0.95                       | 0.035 | 0.006 | 4.88E-09 | NA in Courage-PD                 |           |                 |                 |       |          |                    |                |  |
| rs7696257  | 4:137474783     | A/G   | 0.37                       | 0.015 | 0.003 | 6.78E-09 | 25                               | 4500      | 0.35            | -0.034          | 0.071 | 6.34E-01 | 35.3               | 1.09E-04       |  |
| rs77215829 | 12:112618346    | A/C   | 0.87                       | 0.024 | 0.004 | 2.02E-10 | 19                               | 3599      | 0.86            | 0.098           | 0.084 | 2.42E-01 | 18.6               | 1.32E-04       |  |
| rs77283305 | 7:132593831     | G/A   | 0.69                       | 0.015 | 0.003 | 3.91E-08 | 25                               | 4500      | 0.70            | 0.022           | 0.052 | 6.77E-01 | 0.0                | 9.80E-05       |  |
| rs7743165  | 6:67521222      | G/T   | 0.50                       | 0.019 | 0.003 | 4.15E-14 | 25                               | 4500      | 0.48            | -0.005          | 0.048 | 9.17E-01 | 5.5                | 1.85E-04       |  |

| SNP                       | Chr:Pos(GRCh37) | EA/BA | Smoking initiation (GSCAN) |       |       |          | Parkinson's disease (Courage-PD) |           |                 |                 |       |          |                    |                |
|---------------------------|-----------------|-------|----------------------------|-------|-------|----------|----------------------------------|-----------|-----------------|-----------------|-------|----------|--------------------|----------------|
|                           |                 |       | EAF                        | Beta  | SE    | P-value  | N studies                        | N samples | EAF             | Beta            | SE    | P-value  | I <sup>2</sup> (%) | R <sup>2</sup> |
| rs7809303                 | 7:69484366      | G/A   | 0.68                       | 0.021 | 0.003 | 3.48E-15 | 25                               | 4500      | 0.68            | 0.071           | 0.050 | 1.55E-01 | 0.0                | 2.01E-04       |
| rs7836565                 | 8:52569449      | C/T   | 0.28                       | 0.016 | 0.003 | 4.36E-08 | 25                               | 4500      | 0.28            | 0.048           | 0.055 | 3.84E-01 | 11.7               | 9.74E-05       |
| rs7920501                 | 10:10043159     | T/A   | 0.54                       | 0.016 | 0.003 | 1.25E-09 | 25                               | 4500      | 0.53            | Excluded for MR |       |          |                    |                |
| rs7921378                 | 10:63674885     | G/C   | 0.52                       | 0.023 | 0.003 | 6.10E-20 | 25                               | 4500      | 0.52            | Excluded for MR |       |          |                    |                |
| rs7929518                 | 11:85980958     | G/A   | 0.77                       | 0.019 | 0.003 | 2.55E-10 | 25                               | 4500      | 0.77            | -0.072          | 0.056 | 1.97E-01 | 7.7                | 1.30E-04       |
| rs7943721                 | 11:73309393     | G/A   | 0.17                       | 0.021 | 0.003 | 3.58E-10 | NA in Courage-PD                 |           |                 |                 |       |          |                    |                |
| rs7969559                 | 12:69655167     | A/G   | 0.29                       | 0.017 | 0.003 | 1.53E-09 | 25                               | 4500      | 0.31            | 0.067           | 0.053 | 2.07E-01 | 5.5                | 1.18E-04       |
| rs8005334                 | 14:79563654     | G/T   | 0.36                       | 0.017 | 0.003 | 3.44E-10 | 25                               | 4500      | 0.35            | -0.021          | 0.050 | 6.67E-01 | 0.0                | 1.28E-04       |
| rs80054503                | 1:72900406      | T/C   | 0.88                       | 0.024 | 0.004 | 3.10E-09 | NA in Courage-PD                 |           |                 |                 |       |          |                    |                |
| rs8096225                 | 18:36921851     | C/A   | 0.70                       | 0.016 | 0.003 | 2.63E-08 | 25                               | 4500      | 0.70            | -0.015          | 0.053 | 7.80E-01 | 8.0                | 1.01E-04       |
| rs876793                  | 1:237852083     | T/C   | 0.65                       | 0.018 | 0.003 | 5.69E-11 | 25                               | 4500      | 0.66            | 0.032           | 0.050 | 5.28E-01 | 12.5               | 1.46E-04       |
| rs9288999                 | 3:114147927     | A/G   | 0.74                       | 0.017 | 0.003 | 1.50E-09 | 25                               | 4500      | 0.74            | -0.038          | 0.055 | 4.87E-01 | 8.0                | 1.18E-04       |
| rs9302604                 | 16:69576894     | G/A   | 0.44                       | 0.019 | 0.003 | 3.29E-13 | 25                               | 4500      | 0.43            | -0.045          | 0.049 | 3.63E-01 | 24.0               | 1.72E-04       |
| rs9323328*                | 14:58653514     | A/G   | 0.46                       | 0.014 | 0.003 | 2.55E-08 | 25                               | 4500      | 0.46            | 0.018           | 0.048 | 7.05E-01 | 0.0                | 1.01E-04       |
| rs9423279                 | 10:125680419    | C/G   | 0.36                       | 0.019 | 0.003 | 3.06E-12 | 1                                | 331       | Excluded for MR |                 |       |          |                    |                |
| rs951740                  | 1:44011737      | A/G   | 0.62                       | 0.030 | 0.003 | 3.82E-29 | 25                               | 4500      | 0.62            | -0.043          | 0.050 | 3.90E-01 | 0.0                | 4.09E-04       |
| rs9540731*                | 13:66949370     | C/T   | 0.49                       | 0.018 | 0.003 | 3.42E-12 | 25                               | 4499      | 0.49            | -0.051          | 0.049 | 2.92E-01 | 4.4                | 1.57E-04       |
| rs9545155                 | 13:80191873     | T/C   | 0.52                       | 0.016 | 0.003 | 3.04E-10 | 25                               | 4500      | 0.52            | 0.037           | 0.049 | 4.53E-01 | 13.8               | 1.29E-04       |
| rs9826984                 | 3:131945722     | G/A   | 0.46                       | 0.014 | 0.003 | 3.87E-08 | 25                               | 4500      | 0.45            | 0.025           | 0.048 | 6.07E-01 | 12.5               | 9.80E-05       |
| rs9922607                 | 16:17570220     | C/T   | 0.80                       | 0.022 | 0.003 | 3.42E-12 | 25                               | 4500      | 0.80            | 0.088           | 0.078 | 2.61E-01 | 25.8               | 1.57E-04       |
| rs9941217                 | 16:18050926     | C/G   | 0.65                       | 0.019 | 0.003 | 3.50E-12 | 25                               | 4500      | 0.66            | 0.026           | 0.068 | 6.99E-01 | 31.7               | 1.57E-04       |
| <b>rs660895: 0 allele</b> |                 |       |                            |       |       |          |                                  |           |                 |                 |       |          |                    |                |
| rs1008078                 | 1:91189731      | T/C   | 0.40                       | 0.023 | 0.003 | 1.63E-18 | 25                               | 14341     | 0.40            | -0.013          | 0.039 | 7.46E-01 | 43.3               | 2.50E-04       |
| rs1022376                 | 2:22067213      | T/C   | 0.48                       | 0.015 | 0.003 | 1.66E-08 | 25                               | 14341     | 0.51            | -0.011          | 0.026 | 6.65E-01 | 0.0                | 1.09E-04       |
| rs10233018                | 7:117523709     | G/A   | 0.52                       | 0.025 | 0.003 | 4.77E-22 | 25                               | 14341     | 0.50            | -0.011          | 0.026 | 6.84E-01 | 0.0                | 3.03E-04       |
| rs10279261                | 7:133589846     | G/A   | 0.38                       | 0.019 | 0.003 | 6.05E-13 | 25                               | 14341     | 0.39            | 0.007           | 0.027 | 8.00E-01 | 0.0                | 1.68E-04       |
| rs1030015*                | 7:78139581      | T/G   | 0.52                       | 0.014 | 0.003 | 2.15E-08 | 25                               | 14341     | 0.52            | -0.016          | 0.029 | 5.84E-01 | 10.2               | 1.02E-04       |
| rs10490159                | 2:51341259      | T/C   | 0.39                       | 0.017 | 0.003 | 3.86E-11 | 25                               | 14341     | 0.39            | -0.029          | 0.026 | 2.63E-01 | 0.0                | 1.42E-04       |
| rs1050847                 | 16:87443734     | C/T   | 0.44                       | 0.015 | 0.003 | 7.37E-09 | 25                               | 14341     | 0.48            | 0.015           | 0.027 | 5.83E-01 | 0.0                | 1.08E-04       |
| rs10789369                | 1:73824909      | A/G   | 0.38                       | 0.023 | 0.003 | 3.39E-19 | 25                               | 14341     | 0.43            | -0.008          | 0.027 | 7.51E-01 | 20.9               | 2.60E-04       |
| rs10853981                | 19:4965064      | A/G   | 0.33                       | 0.015 | 0.003 | 4.88E-08 | 25                               | 14341     | 0.31            | -0.045          | 0.028 | 1.07E-01 | 0.0                | 9.67E-05       |
| rs10858334                | 9:137989785     | G/C   | 0.14                       | 0.023 | 0.004 | 1.18E-09 | 25                               | 14341     | 0.14            | -0.032          | 0.039 | 4.07E-01 | 0.0                | 1.26E-04       |
| rs10885480                | 10:115378364    | T/C   | 0.72                       | 0.019 | 0.003 | 3.83E-11 | 25                               | 14341     | 0.73            | 0.009           | 0.030 | 7.66E-01 | 0.0                | 1.42E-04       |
| rs10914684                | 1:33795572      | G/A   | 0.68                       | 0.016 | 0.003 | 6.32E-09 | 25                               | 14341     | 0.67            | -0.021          | 0.028 | 4.43E-01 | 0.0                | 1.09E-04       |
| rs10945141                | 6:69470709      | A/G   | 0.26                       | 0.018 | 0.003 | 3.59E-10 | 25                               | 14341     | 0.26            | -0.009          | 0.029 | 7.68E-01 | 0.0                | 1.28E-04       |
| rs10953957                | 7:121954709     | A/G   | 0.39                       | 0.014 | 0.003 | 3.66E-08 | 25                               | 14341     | 0.39            | 0.043           | 0.027 | 1.09E-01 | 2.3                | 9.84E-05       |
| rs10966092                | 9:23831658      | T/C   | 0.73                       | 0.020 | 0.003 | 1.12E-12 | 25                               | 14341     | 0.73            | 0.015           | 0.029 | 6.00E-01 | 0.0                | 1.64E-04       |
| rs11057005                | 12:16748721     | A/G   | 0.56                       | 0.016 | 0.003 | 9.12E-10 | 25                               | 14341     | 0.58            | -0.033          | 0.027 | 2.32E-01 | 24.0               | 1.22E-04       |

| SNP         | Chr:Pos(GRCh37) | EA/BA | Smoking initiation (GSCAN) |       |       |          | Parkinson's disease (Courage-PD) |           |                 |                 |       |          |                    |                |
|-------------|-----------------|-------|----------------------------|-------|-------|----------|----------------------------------|-----------|-----------------|-----------------|-------|----------|--------------------|----------------|
|             |                 |       | EAF                        | Beta  | SE    | P-value  | N studies                        | N samples | EAF             | Beta            | SE    | P-value  | I <sup>2</sup> (%) | R <sup>2</sup> |
| rs1106363   | 11:131966264    | T/C   | 0.34                       | 0.017 | 0.003 | 9.20E-11 | 25                               | 14341     | 0.37            | -0.015          | 0.027 | 5.71E-01 | 0.0                | 1.36E-04       |
| rs11076962  | 16:5811367      | C/T   | 0.28                       | 0.018 | 0.003 | 1.20E-10 | 25                               | 14341     | 0.26            | 0.042           | 0.029 | 1.56E-01 | 0.0                | 1.35E-04       |
| rs1108130   | 13:100648356    | A/T   | 0.21                       | 0.024 | 0.003 | 1.57E-14 | 25                               | 14341     | 0.20            | -0.055          | 0.033 | 9.43E-02 | 0.0                | 1.92E-04       |
| rs1109480   | 12:121083279    | G/A   | 0.62                       | 0.017 | 0.003 | 1.84E-10 | 25                               | 14341     | 0.62            | -0.035          | 0.027 | 1.88E-01 | 0.0                | 1.32E-04       |
| rs11128203  | 3:71064431      | A/T   | 0.53                       | 0.020 | 0.003 | 1.29E-15 | 12                               | 5260      | Excluded for MR |                 |       |          |                    |                |
| rs11162019  | 1:87913176      | C/T   | 0.64                       | 0.015 | 0.003 | 5.06E-09 | 25                               | 14341     | 0.65            | -0.021          | 0.039 | 5.97E-01 | 41.7               | 1.11E-04       |
| rs1116690   | 4:143510148     | G/A   | 0.74                       | 0.016 | 0.003 | 2.16E-08 | 23                               | 13858     | 0.71            | 0.037           | 0.031 | 2.30E-01 | 0.0                | 1.02E-04       |
| rs1126757*  | 19:55879872     | T/C   | 0.47                       | 0.014 | 0.003 | 2.92E-08 | 24                               | 14204     | 0.47            | -0.017          | 0.026 | 5.30E-01 | 0.0                | 1.00E-04       |
| rs112725451 | 4:68017710      | T/C   | 0.17                       | 0.026 | 0.003 | 1.65E-14 | 25                               | 14341     | 0.17            | 0.022           | 0.043 | 6.13E-01 | 26.7               | 1.91E-04       |
| rs113230003 | 19:18460956     | G/A   | 0.74                       | 0.019 | 0.003 | 1.05E-10 | 25                               | 14341     | 0.76            | 0.056           | 0.031 | 7.59E-02 | 4.4                | 1.35E-04       |
| rs1139897   | 16:720986       | G/A   | 0.77                       | 0.024 | 0.003 | 1.77E-15 | 24                               | 14205     | 0.78            | 0.042           | 0.032 | 1.85E-01 | 20.6               | 2.06E-04       |
| rs1150668   | 6:28129789      | T/G   | 0.58                       | 0.019 | 0.003 | 8.54E-13 | 25                               | 14341     | 0.58            | 0.014           | 0.027 | 5.96E-01 | 0.0                | 1.67E-04       |
| rs11594623  | 10:103960351    | C/T   | 0.23                       | 0.027 | 0.003 | 7.45E-20 | 25                               | 14341     | 0.21            | -0.036          | 0.031 | 2.52E-01 | 0.0                | 2.70E-04       |
| rs1160685   | 4:94052854      | G/C   | 0.45                       | 0.015 | 0.003 | 2.31E-09 | 25                               | 14341     | 0.48            | Excluded for MR |       |          |                    |                |
| rs11611651  | 12:133380790    | A/G   | 0.09                       | 0.027 | 0.005 | 2.05E-09 | 25                               | 14341     | 0.08            | -0.108          | 0.048 | 2.30E-02 | 0.0                | 1.17E-04       |
| rs11642231  | 16:89608702     | G/A   | 0.63                       | 0.016 | 0.003 | 3.44E-09 | 25                               | 14341     | 0.68            | 0.029           | 0.028 | 3.06E-01 | 0.0                | 1.13E-04       |
| rs11713899  | 3:2365026       | C/A   | 0.17                       | 0.019 | 0.003 | 3.15E-08 | 25                               | 14341     | 0.17            | -0.009          | 0.035 | 7.91E-01 | 0.0                | 9.93E-05       |
| rs6050446†  | 20:25195509     | G/C   | 0.95                       | 0.054 | 0.008 | 8.80E-13 | 20                               | 12663     | 0.98            | -0.082          | 0.093 | 3.78E-01 | 0.0                | 2.81E-04       |
| rs117657830 | 16:75766873     | A/G   | 0.96                       | 0.038 | 0.006 | 3.18E-09 | 25                               | 14341     | 0.96            | -0.053          | 0.066 | 4.25E-01 | 0.0                | 1.14E-04       |
| rs11768481  | 7:96629103      | C/A   | 0.66                       | 0.019 | 0.003 | 5.23E-12 | 7                                | 3933      | Excluded for MR |                 |       |          |                    |                |
| rs117734003 | 19:51129745     | C/G   | 0.07                       | 0.030 | 0.005 | 2.57E-09 | 17                               | 9566      | Excluded for MR |                 |       |          |                    |                |
| rs11783093  | 8:27425349      | C/T   | 0.84                       | 0.047 | 0.003 | 2.07E-41 | 25                               | 14341     | 0.84            | -0.014          | 0.035 | 6.82E-01 | 0.0                | 5.91E-04       |
| rs11791671  | 9:3398679       | T/C   | 0.07                       | 0.028 | 0.005 | 4.24E-08 | 25                               | 14341     | 0.07            | 0.002           | 0.054 | 9.68E-01 | 18.2               | 9.74E-05       |
| rs118202    | 6:111658371     | G/T   | 0.19                       | 0.037 | 0.003 | 1.90E-29 | 25                               | 14341     | 0.19            | -0.070          | 0.034 | 3.82E-02 | 21.9               | 4.12E-04       |
| rs1187820   | 3:173072584     | C/T   | 0.56                       | 0.014 | 0.003 | 2.69E-08 | 25                               | 14341     | 0.56            | 0.030           | 0.037 | 4.25E-01 | 31.8               | 1.00E-04       |
| rs12022778  | 1:50603995      | C/A   | 0.20                       | 0.027 | 0.003 | 3.18E-17 | 25                               | 14341     | 0.19            | -0.002          | 0.033 | 9.47E-01 | 0.0                | 2.32E-04       |
| rs12027999  | 1:154206358     | T/C   | 0.88                       | 0.024 | 0.004 | 5.33E-10 | 25                               | 14341     | 0.90            | -0.007          | 0.043 | 8.71E-01 | 21.2               | 1.25E-04       |
| rs12130857  | 1:7791461       | G/A   | 0.68                       | 0.018 | 0.003 | 3.65E-11 | 25                               | 14341     | 0.69            | -0.013          | 0.028 | 6.29E-01 | 0.0                | 1.42E-04       |
| rs12195240  | 6:98636905      | A/G   | 0.28                       | 0.025 | 0.003 | 1.08E-18 | 25                               | 14341     | 0.29            | -0.018          | 0.028 | 5.11E-01 | 5.1                | 2.53E-04       |
| rs12244388  | 10:104640052    | A/G   | 0.35                       | 0.026 | 0.003 | 4.31E-22 | 25                               | 14341     | 0.37            | -0.054          | 0.027 | 4.60E-02 | 0.0                | 3.03E-04       |
| rs12474587  | 2:162802993     | T/G   | 0.43                       | 0.024 | 0.003 | 4.83E-21 | 25                               | 14341     | 0.39            | 0.042           | 0.027 | 1.12E-01 | 0.0                | 2.88E-04       |
| rs12517438  | 5:30842054      | G/T   | 0.54                       | 0.015 | 0.003 | 1.89E-09 | 25                               | 14341     | 0.52            | 0.009           | 0.026 | 7.22E-01 | 0.0                | 1.17E-04       |
| rs12633090  | 3:83241365      | G/C   | 0.82                       | 0.023 | 0.003 | 3.16E-12 | 25                               | 14341     | 0.81            | 0.033           | 0.033 | 3.20E-01 | 20.0               | 1.58E-04       |
| rs12714017  | 2:80999398      | C/T   | 0.51                       | 0.015 | 0.003 | 3.65E-09 | 25                               | 14341     | 0.52            | 0.009           | 0.026 | 7.29E-01 | 0.0                | 1.18E-04       |
| rs12739243  | 1:210302043     | T/C   | 0.78                       | 0.021 | 0.003 | 4.45E-12 | 25                               | 14341     | 0.78            | 0.030           | 0.039 | 4.43E-01 | 26.7               | 1.56E-04       |
| rs12878369  | 14:28346502     | A/C   | 0.41                       | 0.017 | 0.003 | 1.60E-11 | 25                               | 14341     | 0.42            | -0.043          | 0.026 | 1.03E-01 | 0.0                | 1.48E-04       |
| rs12918191  | 16:50945156     | A/G   | 0.76                       | 0.020 | 0.003 | 3.14E-11 | 25                               | 14341     | 0.76            | -0.010          | 0.030 | 7.49E-01 | 0.0                | 1.43E-04       |
| rs1291821   | 10:11133823     | G/A   | 0.53                       | 0.014 | 0.003 | 1.39E-08 | 25                               | 14341     | 0.54            | -0.035          | 0.026 | 1.81E-01 | 8.2                | 1.05E-04       |
| rs13007361  | 2:166250244     | A/G   | 0.21                       | 0.018 | 0.003 | 2.29E-08 | 25                               | 14341     | 0.21            | 0.025           | 0.031 | 4.19E-01 | 0.0                | 1.01E-04       |

| SNP         | Chr:Pos(GRCh37) | EA/BA | Smoking initiation (GSCAN) |       |       |          | Parkinson's disease (Courage-PD) |           |                 |                 |       |          |                    |                |  |
|-------------|-----------------|-------|----------------------------|-------|-------|----------|----------------------------------|-----------|-----------------|-----------------|-------|----------|--------------------|----------------|--|
|             |                 |       | EAF                        | Beta  | SE    | P-value  | N studies                        | N samples | EAF             | Beta            | SE    | P-value  | I <sup>2</sup> (%) | R <sup>2</sup> |  |
| rs13110073  | 4:147797913     | T/C   | 0.60                       | 0.025 | 0.003 | 3.24E-21 | 25                               | 14341     | 0.62            | -0.056          | 0.026 | 3.21E-02 | 6.5                | 2.90E-04       |  |
| rs13261666  | 8:59814666      | G/T   | 0.48                       | 0.020 | 0.003 | 4.36E-15 | 25                               | 14341     | 0.48            | -0.001          | 0.026 | 9.76E-01 | 10.8               | 2.00E-04       |  |
| rs13392222  | 2:100672408     | A/C   | 0.86                       | 0.023 | 0.004 | 1.93E-10 | 25                               | 14341     | 0.87            | 0.031           | 0.039 | 4.23E-01 | 0.0                | 1.31E-04       |  |
| rs13437771  | 7:99071478      | A/G   | 0.84                       | 0.027 | 0.004 | 1.39E-14 | 25                               | 14341     | 0.85            | -0.012          | 0.048 | 8.10E-01 | 32.7               | 1.93E-04       |  |
| rs1373178   | 18:49967811     | T/G   | 0.41                       | 0.020 | 0.003 | 4.16E-15 | 25                               | 14341     | 0.42            | -0.044          | 0.027 | 1.01E-01 | 0.0                | 2.00E-04       |  |
| rs1381287   | 14:98597552     | T/C   | 0.47                       | 0.018 | 0.003 | 1.81E-12 | 25                               | 14341     | 0.49            | 0.018           | 0.026 | 4.79E-01 | 0.0                | 1.62E-04       |  |
| rs1381775   | 11:42442826     | T/C   | 0.29                       | 0.016 | 0.003 | 2.79E-08 | 25                               | 14341     | 0.29            | -0.038          | 0.029 | 1.86E-01 | 0.0                | 1.00E-04       |  |
| rs1385108   | 5:154839646     | T/C   | 0.24                       | 0.019 | 0.003 | 3.84E-10 | 25                               | 14341     | 0.23            | -0.026          | 0.031 | 3.96E-01 | 0.0                | 1.27E-04       |  |
| rs13906     | 12:49952394     | C/T   | 0.89                       | 0.025 | 0.004 | 1.98E-09 | 25                               | 14341     | 0.89            | -0.063          | 0.042 | 1.35E-01 | 0.0                | 1.17E-04       |  |
| rs1435672   | 15:36399479     | C/T   | 0.56                       | 0.014 | 0.003 | 3.82E-08 | 25                               | 14341     | 0.54            | -0.004          | 0.026 | 8.79E-01 | 0.0                | 9.80E-05       |  |
| rs1445649   | 2:155682556     | C/T   | 0.54                       | 0.021 | 0.003 | 8.48E-16 | 25                               | 14341     | 0.53            | -0.005          | 0.026 | 8.48E-01 | 0.0                | 2.10E-04       |  |
| rs1449012   | 3:159048333     | C/T   | 0.54                       | 0.015 | 0.003 | 1.77E-09 | 25                               | 14341     | 0.53            | 0.006           | 0.034 | 8.48E-01 | 28.8               | 1.18E-04       |  |
| rs147052174 | 1:179783167     | T/G   | 0.02                       | 0.062 | 0.010 | 2.30E-10 | 11                               | 7047      | Excluded for MR |                 |       |          |                    |                |  |
| rs1514176   | 1:74991596      | G/A   | 0.42                       | 0.019 | 0.003 | 7.67E-14 | 25                               | 14341     | 0.43            | -0.011          | 0.027 | 6.90E-01 | 0.5                | 1.81E-04       |  |
| rs1549979   | 3:85460131      | C/T   | 0.38                       | 0.025 | 0.003 | 8.80E-21 | 25                               | 14341     | 0.38            | 0.036           | 0.027 | 1.71E-01 | 0.0                | 2.85E-04       |  |
| rs160631    | 6:52895230      | T/G   | 0.27                       | 0.017 | 0.003 | 1.87E-09 | 25                               | 14341     | 0.28            | 0.033           | 0.029 | 2.51E-01 | 12.5               | 1.17E-04       |  |
| rs16826827  | 2:147825689     | T/C   | 0.88                       | 0.022 | 0.004 | 9.17E-09 | 25                               | 14341     | 0.88            | 0.023           | 0.040 | 5.70E-01 | 8.6                | 1.07E-04       |  |
| rs1713676*  | 11:113660576    | A/G   | 0.48                       | 0.017 | 0.003 | 5.38E-11 | 25                               | 14341     | 0.47            | 0.008           | 0.028 | 7.82E-01 | 8.2                | 1.40E-04       |  |
| rs1714521   | 3:158284861     | A/C   | 0.59                       | 0.016 | 0.003 | 3.07E-10 | 25                               | 14341     | 0.61            | 0.008           | 0.038 | 8.23E-01 | 41.6               | 1.29E-04       |  |
| rs17197663  | 13:38172867     | G/A   | 0.88                       | 0.022 | 0.004 | 2.06E-08 | 25                               | 14341     | 0.87            | 0.052           | 0.038 | 1.74E-01 | 1.8                | 1.02E-04       |  |
| rs17229285  | 2:199523122     | C/T   | 0.50                       | 0.015 | 0.003 | 1.27E-09 | 25                               | 14341     | 0.52            | 0.016           | 0.036 | 6.56E-01 | 34.7               | 1.20E-04       |  |
| rs1733760   | 10:56698174     | C/T   | 0.51                       | 0.015 | 0.003 | 6.70E-09 | 25                               | 14341     | 0.50            | 0.025           | 0.026 | 3.50E-01 | 0.0                | 1.09E-04       |  |
| rs1737329   | 6:163807748     | G/C   | 0.74                       | 0.017 | 0.003 | 5.08E-09 | 25                               | 14341     | 0.72            | 0.019           | 0.041 | 6.52E-01 | 36.2               | 1.11E-04       |  |
| rs17554906  | 6:92226609      | C/G   | 0.44                       | 0.014 | 0.003 | 3.14E-08 | 25                               | 14341     | 0.42            | Excluded for MR |       |          |                    |                |  |
| rs1772572   | 13:81191176     | C/A   | 0.68                       | 0.017 | 0.003 | 5.62E-10 | 25                               | 14341     | 0.68            | -0.022          | 0.027 | 4.12E-01 | 0.0                | 1.25E-04       |  |
| rs1811739   | 14:77529375     | A/G   | 0.25                       | 0.018 | 0.003 | 5.97E-10 | 25                               | 14341     | 0.25            | -0.010          | 0.045 | 8.28E-01 | 44.7               | 1.25E-04       |  |
| rs1889571   | 1:32195819      | G/T   | 0.13                       | 0.022 | 0.004 | 4.19E-09 | 25                               | 14341     | 0.12            | 0.025           | 0.040 | 5.27E-01 | 0.0                | 1.12E-04       |  |
| rs1901477   | 2:104126983     | G/A   | 0.51                       | 0.030 | 0.003 | 2.07E-31 | 25                               | 14341     | 0.52            | -0.001          | 0.037 | 9.76E-01 | 41.3               | 4.63E-04       |  |
| rs2010921   | 11:132098205    | A/G   | 0.31                       | 0.017 | 0.003 | 2.47E-10 | 25                               | 14341     | 0.31            | -0.006          | 0.028 | 8.24E-01 | 0.0                | 1.30E-04       |  |
| rs2063976   | 8:91096366      | C/T   | 0.34                       | 0.020 | 0.003 | 7.45E-14 | 25                               | 14341     | 0.33            | 0.016           | 0.028 | 5.55E-01 | 0.0                | 1.81E-04       |  |
| rs2155646   | 11:112912811    | C/T   | 0.40                       | 0.038 | 0.003 | 9.44E-48 | 25                               | 14341     | 0.39            | -0.005          | 0.027 | 8.52E-01 | 0.0                | 6.85E-04       |  |
| rs2173019   | 5:167614971     | A/T   | 0.18                       | 0.028 | 0.003 | 2.98E-17 | 25                               | 14341     | 0.17            | 0.030           | 0.034 | 3.81E-01 | 4.8                | 2.32E-04       |  |
| rs221988    | 3:64234307      | A/C   | 0.62                       | 0.015 | 0.003 | 1.43E-08 | 25                               | 14341     | 0.62            | 0.007           | 0.028 | 8.10E-01 | 0.0                | 1.05E-04       |  |
| rs2279829   | 3:147106319     | C/T   | 0.78                       | 0.017 | 0.003 | 2.05E-08 | 25                               | 14341     | 0.80            | -0.008          | 0.033 | 8.14E-01 | 8.7                | 1.02E-04       |  |
| rs2289791   | 15:67476952     | G/T   | 0.75                       | 0.018 | 0.003 | 2.01E-09 | 12                               | 5260      | Excluded for MR |                 |       |          |                    |                |  |
| rs2319545   | 3:147719648     | A/C   | 0.15                       | 0.023 | 0.004 | 8.30E-11 | 25                               | 14341     | 0.13            | 0.006           | 0.039 | 8.84E-01 | 0.0                | 1.37E-04       |  |
| rs2378662   | 9:86707289      | A/G   | 0.54                       | 0.015 | 0.003 | 2.67E-09 | 25                               | 14341     | 0.53            | 0.013           | 0.027 | 6.29E-01 | 19.0               | 1.15E-04       |  |
| rs2526390   | 3:50192760      | T/C   | 0.33                       | 0.020 | 0.003 | 3.62E-14 | 25                               | 14341     | 0.33            | 0.004           | 0.028 | 8.71E-01 | 2.6                | 1.86E-04       |  |
| rs2587507*  | 17:77790135     | T/C   | 0.50                       | 0.015 | 0.003 | 8.69E-09 | 25                               | 14338     | 0.51            | -0.013          | 0.026 | 6.28E-01 | 0.0                | 1.07E-04       |  |

| SNP        | Chr:Pos(GRCh37) | EA/BA | Smoking initiation (GSCAN) |       |       |          | Parkinson's disease (Courage-PD) |           |                 |                 |       |          |                    |                |
|------------|-----------------|-------|----------------------------|-------|-------|----------|----------------------------------|-----------|-----------------|-----------------|-------|----------|--------------------|----------------|
|            |                 |       | EAF                        | Beta  | SE    | P-value  | N studies                        | N samples | EAF             | Beta            | SE    | P-value  | I <sup>2</sup> (%) | R <sup>2</sup> |
| rs2710634  | 2:32808804      | T/C   | 0.48                       | 0.018 | 0.003 | 3.36E-12 | 25                               | 14341     | 0.50            | -0.023          | 0.026 | 3.81E-01 | 0.0                | 1.57E-04       |
| rs2796793  | 10:36634124     | A/G   | 0.45                       | 0.014 | 0.003 | 1.55E-08 | 24                               | 13527     | 0.42            | 0.063           | 0.041 | 1.25E-01 | 48.9               | 1.04E-04       |
| rs281296   | 15:47685010     | A/G   | 0.36                       | 0.025 | 0.003 | 1.59E-20 | 25                               | 14341     | 0.37            | -0.014          | 0.027 | 5.96E-01 | 0.0                | 2.80E-04       |
| rs28441558 | 17:7803118      | T/C   | 0.94                       | 0.036 | 0.006 | 1.24E-10 | 17                               | 9566      | Excluded for MR |                 |       |          |                    |                |
| rs2901785  | 1:174104743     | G/A   | 0.55                       | 0.017 | 0.003 | 1.47E-11 | 25                               | 14341     | 0.55            | -0.017          | 0.026 | 5.11E-01 | 0.5                | 1.48E-04       |
| rs290601   | 8:115374642     | T/C   | 0.27                       | 0.016 | 0.003 | 1.14E-08 | 25                               | 14341     | 0.27            | -0.008          | 0.029 | 7.80E-01 | 0.0                | 1.06E-04       |
| rs2925128  | 14:98362355     | T/C   | 0.39                       | 0.017 | 0.003 | 3.67E-10 | 25                               | 14341     | 0.39            | -0.072          | 0.034 | 3.32E-02 | 27.8               | 1.34E-04       |
| rs2939756  | 11:41436297     | G/A   | 0.52                       | 0.016 | 0.003 | 7.45E-10 | 25                               | 14341     | 0.56            | -0.009          | 0.032 | 7.76E-01 | 25.3               | 1.23E-04       |
| rs3218116  | 6:41901763      | C/T   | 0.74                       | 0.020 | 0.003 | 1.05E-11 | 25                               | 14341     | 0.76            | 0.020           | 0.030 | 5.01E-01 | 0.0                | 1.50E-04       |
| rs329124   | 5:133865452     | A/G   | 0.57                       | 0.016 | 0.003 | 1.96E-10 | 25                               | 14341     | 0.57            | -0.011          | 0.026 | 6.70E-01 | 0.0                | 1.31E-04       |
| rs34342129 | 18:5872472      | T/C   | 0.49                       | 0.014 | 0.003 | 2.13E-08 | 25                               | 14341     | 0.50            | -0.032          | 0.026 | 2.23E-01 | 0.0                | 1.02E-04       |
| rs34399632 | 2:137571174     | G/A   | 0.23                       | 0.019 | 0.003 | 1.46E-10 | 25                               | 14341     | 0.18            | -0.051          | 0.034 | 1.37E-01 | 0.0                | 1.33E-04       |
| rs34553878 | 9:134334588     | G/A   | 0.11                       | 0.025 | 0.004 | 1.17E-09 | 17                               | 9944      | Excluded for MR |                 |       |          |                    |                |
| rs35375873 | 5:43190647      | G/C   | 0.89                       | 0.027 | 0.004 | 3.29E-11 | 17                               | 9566      | Excluded for MR |                 |       |          |                    |                |
| rs3556245  | 1:190957480     | A/G   | 0.28                       | 0.016 | 0.003 | 2.23E-08 | 25                               | 14341     | 0.29            | 0.001           | 0.028 | 9.85E-01 | 0.0                | 1.02E-04       |
| rs359247   | 2:60477052      | T/A   | 0.64                       | 0.022 | 0.003 | 9.89E-17 | 25                               | 14341     | 0.61            | -0.009          | 0.027 | 7.34E-01 | 10.3               | 2.24E-04       |
| rs3764351  | 17:37824339     | G/A   | 0.34                       | 0.015 | 0.003 | 3.89E-08 | 25                               | 14341     | 0.37            | -0.042          | 0.040 | 2.95E-01 | 39.8               | 9.80E-05       |
| rs3810496  | 20:62406886     | C/T   | 0.62                       | 0.016 | 0.003 | 1.54E-09 | 24                               | 14178     | 0.62            | -0.055          | 0.038 | 1.54E-01 | 33.5               | 1.19E-04       |
| rs3811038  | 2:113240183     | C/T   | 0.28                       | 0.019 | 0.003 | 1.58E-11 | 25                               | 14341     | 0.28            | -0.018          | 0.029 | 5.35E-01 | 22.9               | 1.47E-04       |
| rs3820277  | 1:18436657      | G/T   | 0.47                       | 0.019 | 0.003 | 1.57E-13 | 25                               | 14341     | 0.50            | -0.052          | 0.026 | 4.24E-02 | 17.5               | 1.77E-04       |
| rs3847244  | 9:3025368       | T/C   | 0.47                       | 0.019 | 0.003 | 2.60E-13 | 25                               | 14341     | 0.48            | -0.046          | 0.027 | 8.34E-02 | 0.0                | 1.74E-04       |
| rs3850736  | 8:64912021      | G/C   | 0.47                       | 0.019 | 0.003 | 6.43E-14 | 25                               | 14341     | 0.46            | Excluded for MR |       |          |                    |                |
| rs3934797  | 4:112467612     | G/A   | 0.82                       | 0.021 | 0.003 | 1.12E-10 | 25                               | 14341     | 0.82            | 0.019           | 0.035 | 6.00E-01 | 18.6               | 1.35E-04       |
| rs4044321  | 5:166989513     | A/G   | 0.36                       | 0.023 | 0.003 | 1.75E-17 | 25                               | 14341     | 0.37            | -0.011          | 0.028 | 7.01E-01 | 0.0                | 2.35E-04       |
| rs4140932  | 4:15458598      | T/A   | 0.57                       | 0.014 | 0.003 | 4.89E-08 | 25                               | 14341     | 0.58            | Excluded for MR |       |          |                    |                |
| rs42417    | 5:94198290      | T/C   | 0.69                       | 0.017 | 0.003 | 8.27E-10 | 25                               | 14341     | 0.70            | -0.047          | 0.039 | 2.29E-01 | 32.7               | 1.22E-04       |
| rs4264267  | 13:38359676     | T/C   | 0.53                       | 0.015 | 0.003 | 6.82E-09 | 25                               | 14341     | 0.52            | -0.017          | 0.026 | 5.26E-01 | 11.1               | 1.09E-04       |
| rs4310804  | 15:96858409     | C/G   | 0.75                       | 0.018 | 0.003 | 7.55E-10 | 22                               | 11421     | 0.77            | -0.021          | 0.037 | 5.67E-01 | 8.2                | 1.23E-04       |
| rs4326350  | 8:10763655      | C/G   | 0.51                       | 0.018 | 0.003 | 5.16E-12 | 25                               | 14341     | 0.53            | Excluded for MR |       |          |                    |                |
| rs4476253  | 18:25253297     | G/A   | 0.76                       | 0.018 | 0.003 | 5.78E-10 | 25                               | 14341     | 0.76            | 0.002           | 0.031 | 9.42E-01 | 19.6               | 1.25E-04       |
| rs45444697 | 1:155034632     | G/C   | 0.21                       | 0.020 | 0.003 | 2.72E-10 | 25                               | 14341     | 0.20            | -0.031          | 0.033 | 3.49E-01 | 0.0                | 1.30E-04       |
| rs4674993  | 2:226332033     | A/G   | 0.80                       | 0.024 | 0.003 | 4.85E-14 | 25                               | 14341     | 0.80            | -0.013          | 0.033 | 6.99E-01 | 1.7                | 1.84E-04       |
| rs4727189  | 7:88442568      | C/T   | 0.34                       | 0.015 | 0.003 | 3.00E-08 | 25                               | 14341     | 0.36            | 0.047           | 0.027 | 7.51E-02 | 8.8                | 9.97E-05       |
| rs4752018  | 10:118678712    | A/C   | 0.23                       | 0.019 | 0.003 | 4.42E-10 | 25                               | 14341     | 0.24            | 0.026           | 0.030 | 3.98E-01 | 6.6                | 1.26E-04       |
| rs4759229  | 12:56474480     | G/A   | 0.66                       | 0.016 | 0.003 | 6.53E-09 | 24                               | 14178     | 0.65            | 0.014           | 0.029 | 6.38E-01 | 0.0                | 1.09E-04       |
| rs4790874  | 17:1995177      | T/C   | 0.53                       | 0.017 | 0.003 | 8.43E-12 | 25                               | 14341     | 0.54            | -0.057          | 0.026 | 3.02E-02 | 0.0                | 1.52E-04       |
| rs4818005  | 21:40588819     | G/A   | 0.42                       | 0.020 | 0.003 | 1.09E-14 | 25                               | 14341     | 0.43            | -0.017          | 0.026 | 5.16E-01 | 2.9                | 2.03E-04       |
| rs4822102  | 22:42698430     | C/T   | 0.38                       | 0.017 | 0.003 | 2.78E-10 | 25                               | 14341     | 0.38            | 0.019           | 0.039 | 6.22E-01 | 41.0               | 1.29E-04       |
| rs4837631  | 9:122061948     | C/T   | 0.55                       | 0.015 | 0.003 | 2.03E-09 | 25                               | 14341     | 0.58            | 0.011           | 0.027 | 6.68E-01 | 0.0                | 1.17E-04       |

| SNP        | Chr:Pos(GRCh37) | EA/BA | Smoking initiation (GSCAN) |       |       |          | Parkinson's disease (Courage-PD) |           |                 |        |       |          |                    |                |  |
|------------|-----------------|-------|----------------------------|-------|-------|----------|----------------------------------|-----------|-----------------|--------|-------|----------|--------------------|----------------|--|
|            |                 |       | EAF                        | Beta  | SE    | P-value  | N studies                        | N samples | EAF             | Beta   | SE    | P-value  | I <sup>2</sup> (%) | R <sup>2</sup> |  |
| rs4877285  | 9:81354129      | G/A   | 0.33                       | 0.018 | 0.003 | 2.10E-11 | 25                               | 14341     | 0.37            | -0.067 | 0.028 | 1.71E-02 | 0.0                | 1.46E-04       |  |
| rs4912332  | 1:58815243      | T/C   | 0.49                       | 0.014 | 0.003 | 2.94E-08 | 25                               | 14341     | 0.47            | 0.005  | 0.026 | 8.58E-01 | 23.4               | 9.97E-05       |  |
| rs540860   | 11:121530888    | G/A   | 0.54                       | 0.018 | 0.003 | 5.75E-12 | 25                               | 14341     | 0.52            | 0.036  | 0.026 | 1.57E-01 | 0.0                | 1.54E-04       |  |
| rs55786907 | 13:59871584     | G/A   | 0.16                       | 0.019 | 0.003 | 1.84E-08 | 25                               | 14341     | 0.17            | -0.018 | 0.034 | 6.01E-01 | 13.2               | 1.03E-04       |  |
| rs58400863 | 4:31184484      | G/A   | 0.65                       | 0.020 | 0.003 | 4.89E-14 | 25                               | 14341     | 0.64            | -0.007 | 0.027 | 8.03E-01 | 3.3                | 1.84E-04       |  |
| rs59537158 | 4:28246049      | T/C   | 0.21                       | 0.022 | 0.003 | 4.62E-13 | 25                               | 14341     | 0.20            | -0.009 | 0.034 | 7.85E-01 | 10.7               | 1.70E-04       |  |
| rs6073075  | 20:42015801     | T/A   | 0.18                       | 0.019 | 0.003 | 2.44E-08 | 25                               | 14341     | 0.20            | -0.014 | 0.034 | 6.88E-01 | 8.0                | 1.01E-04       |  |
| rs61533748 | 2:22582968      | C/T   | 0.38                       | 0.017 | 0.003 | 2.82E-11 | 25                               | 14341     | 0.37            | 0.007  | 0.027 | 8.01E-01 | 1.2                | 1.44E-04       |  |
| rs61886926 | 11:64133552     | C/T   | 0.62                       | 0.018 | 0.003 | 7.30E-12 | 25                               | 14341     | 0.64            | -0.026 | 0.027 | 3.27E-01 | 20.0               | 1.52E-04       |  |
| rs61959481 | 13:55834929     | G/A   | 0.79                       | 0.020 | 0.003 | 7.95E-11 | 25                               | 14341     | 0.79            | -0.017 | 0.032 | 5.89E-01 | 0.0                | 1.37E-04       |  |
| rs62007780 | 15:78025464     | G/T   | 0.58                       | 0.016 | 0.003 | 7.48E-10 | 25                               | 14341     | 0.59            | -0.004 | 0.026 | 8.82E-01 | 0.0                | 1.23E-04       |  |
| rs62193862 | 2:202843875     | A/G   | 0.10                       | 0.024 | 0.004 | 1.99E-08 | 14                               | 8025      | Excluded for MR |        |       |          |                    |                |  |
| rs62246017 | 3:71483084      | G/A   | 0.68                       | 0.016 | 0.003 | 3.03E-09 | 25                               | 14341     | 0.67            | -0.042 | 0.029 | 1.51E-01 | 11.4               | 1.14E-04       |  |
| rs62340589 | 4:176875795     | C/G   | 0.20                       | 0.017 | 0.003 | 4.31E-08 | 25                               | 14341     | 0.19            | -0.028 | 0.043 | 5.20E-01 | 29.5               | 9.74E-05       |  |
| rs6265*    | 11:27679916     | C/T   | 0.81                       | 0.029 | 0.003 | 2.81E-19 | 25                               | 14341     | 0.80            | -0.007 | 0.032 | 8.20E-01 | 0.0                | 2.62E-04       |  |
| rs6437769  | 3:107997514     | T/C   | 0.58                       | 0.014 | 0.003 | 3.74E-08 | 25                               | 14341     | 0.59            | -0.008 | 0.026 | 7.71E-01 | 17.0               | 9.84E-05       |  |
| rs6438436  | 3:117822149     | T/C   | 0.82                       | 0.025 | 0.003 | 5.33E-14 | 25                               | 14341     | 0.82            | 0.035  | 0.034 | 3.12E-01 | 12.4               | 1.84E-04       |  |
| rs644740   | 11:65561468     | C/T   | 0.54                       | 0.014 | 0.003 | 3.67E-08 | 25                               | 14341     | 0.54            | 0.011  | 0.026 | 6.66E-01 | 0.0                | 9.84E-05       |  |
| rs6452785  | 5:87685500      | C/T   | 0.53                       | 0.027 | 0.003 | 4.69E-26 | 25                               | 14341     | 0.51            | -0.008 | 0.026 | 7.47E-01 | 0.0                | 3.60E-04       |  |
| rs6497840  | 16:25351633     | A/G   | 0.71                       | 0.023 | 0.003 | 2.01E-15 | 25                               | 14341     | 0.69            | -0.025 | 0.029 | 3.73E-01 | 0.0                | 2.15E-04       |  |
| rs6568832  | 6:97702876      | A/G   | 0.75                       | 0.019 | 0.003 | 1.74E-10 | 25                               | 14341     | 0.75            | 0.016  | 0.030 | 5.90E-01 | 6.0                | 1.32E-04       |  |
| rs67050670 | 18:39297254     | A/G   | 0.77                       | 0.020 | 0.003 | 2.34E-11 | 25                               | 14341     | 0.75            | 0.029  | 0.030 | 3.35E-01 | 0.0                | 1.45E-04       |  |
| rs6731872  | 2:624205        | G/T   | 0.83                       | 0.032 | 0.003 | 5.35E-21 | 25                               | 14341     | 0.80            | 0.021  | 0.033 | 5.15E-01 | 0.0                | 2.87E-04       |  |
| rs6750529  | 2:182027603     | T/C   | 0.74                       | 0.020 | 0.003 | 9.26E-12 | 25                               | 14341     | 0.75            | -0.026 | 0.030 | 3.80E-01 | 0.0                | 1.51E-04       |  |
| rs6756212  | 2:146140132     | C/T   | 0.47                       | 0.034 | 0.003 | 3.49E-40 | 25                               | 14341     | 0.46            | -0.040 | 0.026 | 1.25E-01 | 13.6               | 5.71E-04       |  |
| rs67777803 | 17:27323322     | G/T   | 0.83                       | 0.025 | 0.003 | 3.18E-13 | 25                               | 14341     | 0.84            | -0.023 | 0.044 | 6.03E-01 | 25.5               | 1.72E-04       |  |
| rs6874731  | 5:80263865      | G/T   | 0.48                       | 0.015 | 0.003 | 1.83E-09 | 25                               | 14341     | 0.47            | -0.009 | 0.039 | 8.10E-01 | 44.7               | 1.17E-04       |  |
| rs6890961  | 5:166778503     | C/T   | 0.38                       | 0.019 | 0.003 | 2.13E-13 | 25                               | 14341     | 0.40            | -0.029 | 0.028 | 2.96E-01 | 0.0                | 1.75E-04       |  |
| rs6936160  | 6:100347745     | T/C   | 0.70                       | 0.020 | 0.003 | 4.20E-13 | 25                               | 14341     | 0.69            | -0.001 | 0.028 | 9.71E-01 | 0.0                | 1.70E-04       |  |
| rs6948707  | 7:1870794       | G/T   | 0.42                       | 0.024 | 0.003 | 4.24E-21 | 25                               | 14341     | 0.40            | 0.006  | 0.035 | 8.64E-01 | 33.1               | 2.89E-04       |  |
| rs6986430  | 8:93048104      | T/C   | 0.78                       | 0.024 | 0.003 | 1.99E-15 | 25                               | 14341     | 0.77            | 0.028  | 0.030 | 3.57E-01 | 0.0                | 2.05E-04       |  |
| rs7024924  | 9:8282399       | C/T   | 0.17                       | 0.019 | 0.003 | 1.90E-08 | 25                               | 14341     | 0.17            | -0.014 | 0.034 | 6.90E-01 | 0.0                | 1.03E-04       |  |
| rs7072776  | 10:22032942     | A/G   | 0.29                       | 0.022 | 0.003 | 5.66E-15 | 24                               | 13527     | 0.33            | 0.001  | 0.030 | 9.79E-01 | 0.0                | 1.98E-04       |  |
| rs7134009  | 12:75263193     | T/C   | 0.71                       | 0.016 | 0.003 | 4.30E-08 | 25                               | 14341     | 0.70            | -0.001 | 0.028 | 9.84E-01 | 0.0                | 1.02E-04       |  |
| rs71367544 | 18:77574374     | T/C   | 0.20                       | 0.021 | 0.003 | 8.54E-11 | 25                               | 14341     | 0.17            | 0.037  | 0.034 | 2.77E-01 | 0.0                | 1.37E-04       |  |
| rs71592686 | 5:60121271      | C/T   | 0.27                       | 0.021 | 0.003 | 3.85E-13 | 25                               | 14341     | 0.26            | 0.030  | 0.029 | 3.08E-01 | 0.0                | 1.71E-04       |  |
| rs71602617 | 4:136406155     | C/T   | 0.78                       | 0.018 | 0.003 | 2.10E-08 | 25                               | 14341     | 0.80            | 0.027  | 0.032 | 4.04E-01 | 0.0                | 1.07E-04       |  |
| rs72780746 | 5:103929588     | T/C   | 0.83                       | 0.026 | 0.003 | 2.05E-14 | 25                               | 14341     | 0.81            | 0.003  | 0.043 | 9.38E-01 | 29.6               | 1.90E-04       |  |
| rs72836318 | 17:44121579     | T/C   | 0.75                       | 0.017 | 0.003 | 7.00E-09 | 25                               | 14341     | 0.75            | -0.081 | 0.030 | 7.58E-03 | 0.0                | 1.09E-04       |  |

| SNP                             | Chr:Pos(GRCh37) | EA/BA | Smoking initiation (GSCAN) |       |       |          | Parkinson's disease (Courage-PD) |           |                 |                 |       |          |                    |                |
|---------------------------------|-----------------|-------|----------------------------|-------|-------|----------|----------------------------------|-----------|-----------------|-----------------|-------|----------|--------------------|----------------|
|                                 |                 |       | EAF                        | Beta  | SE    | P-value  | N studies                        | N samples | EAF             | Beta            | SE    | P-value  | I <sup>2</sup> (%) | R <sup>2</sup> |
| rs72938304                      | 18:53661743     | G/A   | 0.89                       | 0.027 | 0.004 | 1.36E-11 | 25                               | 14341     | 0.88            | 0.015           | 0.041 | 7.08E-01 | 13.4               | 1.48E-04       |
| rs748832                        | 3:16851202      | G/A   | 0.37                       | 0.017 | 0.003 | 6.60E-11 | 25                               | 14341     | 0.35            | 0.047           | 0.027 | 8.15E-02 | 0.0                | 1.38E-04       |
| rs75919030                      | 17:50193197     | T/C   | 0.73                       | 0.021 | 0.003 | 3.35E-13 | 25                               | 14341     | 0.74            | 0.003           | 0.029 | 9.11E-01 | 0.0                | 1.72E-04       |
| rs7598402                       | 2:50735943      | C/G   | 0.51                       | 0.015 | 0.003 | 7.38E-09 | 25                               | 14341     | 0.51            | Excluded for MR |       |          |                    |                |
| rs7631379                       | 3:181409057     | C/T   | 0.21                       | 0.021 | 0.003 | 3.94E-11 | 25                               | 14341     | 0.19            | -0.019          | 0.049 | 7.01E-01 | 38.9               | 1.42E-04       |
| rs76608582                      | 19:4474725      | C/A   | 0.95                       | 0.035 | 0.006 | 4.88E-09 | NA in Courage-PD                 |           |                 |                 |       |          |                    |                |
| rs7696257                       | 4:137474783     | A/G   | 0.37                       | 0.015 | 0.003 | 6.78E-09 | 25                               | 14341     | 0.36            | -0.012          | 0.027 | 6.56E-01 | 0.0                | 1.09E-04       |
| rs77215829                      | 12:112618346    | A/C   | 0.87                       | 0.024 | 0.004 | 2.02E-10 | 19                               | 9827      | 0.87            | 0.045           | 0.050 | 3.66E-01 | 9.4                | 1.32E-04       |
| rs77283305                      | 7:132593831     | G/A   | 0.69                       | 0.015 | 0.003 | 3.91E-08 | 25                               | 14341     | 0.70            | -0.028          | 0.036 | 4.43E-01 | 28.0               | 9.80E-05       |
| rs7743165                       | 6:67521222      | G/T   | 0.50                       | 0.019 | 0.003 | 4.15E-14 | 25                               | 14341     | 0.47            | -0.055          | 0.035 | 1.17E-01 | 33.7               | 1.85E-04       |
| rs7809303                       | 7:69484366      | G/A   | 0.68                       | 0.021 | 0.003 | 3.48E-15 | 25                               | 14341     | 0.70            | -0.035          | 0.028 | 2.14E-01 | 0.0                | 2.01E-04       |
| rs7836565                       | 8:52569449      | C/T   | 0.28                       | 0.016 | 0.003 | 4.36E-08 | 25                               | 14341     | 0.29            | 0.067           | 0.029 | 2.10E-02 | 0.0                | 9.74E-05       |
| rs7920501                       | 10:10043159     | T/A   | 0.54                       | 0.016 | 0.003 | 1.25E-09 | 25                               | 14341     | 0.53            | Excluded for MR |       |          |                    |                |
| rs7921378                       | 10:63674885     | G/C   | 0.52                       | 0.023 | 0.003 | 6.10E-20 | 25                               | 14341     | 0.53            | Excluded for MR |       |          |                    |                |
| rs7929518                       | 11:85980958     | G/A   | 0.77                       | 0.019 | 0.003 | 2.55E-10 | 25                               | 14341     | 0.77            | -0.044          | 0.030 | 1.52E-01 | 24.4               | 1.30E-04       |
| rs7943721                       | 11:73309393     | G/A   | 0.17                       | 0.021 | 0.003 | 3.58E-10 | NA in Courage-PD                 |           |                 |                 |       |          |                    |                |
| rs7969559                       | 12:69655167     | A/G   | 0.29                       | 0.017 | 0.003 | 1.53E-09 | 25                               | 14341     | 0.33            | -0.019          | 0.036 | 6.02E-01 | 27.1               | 1.18E-04       |
| rs8005334                       | 14:79563654     | G/T   | 0.36                       | 0.017 | 0.003 | 3.44E-10 | 25                               | 14341     | 0.35            | -0.017          | 0.027 | 5.24E-01 | 0.0                | 1.28E-04       |
| rs80054503                      | 1:72900406      | T/C   | 0.88                       | 0.024 | 0.004 | 3.10E-09 | NA in Courage-PD                 |           |                 |                 |       |          |                    |                |
| rs8096225                       | 18:36921851     | C/A   | 0.70                       | 0.016 | 0.003 | 2.63E-08 | 25                               | 14341     | 0.70            | -0.020          | 0.028 | 4.82E-01 | 0.0                | 1.01E-04       |
| rs876793                        | 1:237852083     | T/C   | 0.65                       | 0.018 | 0.003 | 5.69E-11 | 25                               | 14341     | 0.66            | 0.045           | 0.028 | 1.08E-01 | 16.3               | 1.46E-04       |
| rs9288999                       | 3:114147927     | A/G   | 0.74                       | 0.017 | 0.003 | 1.50E-09 | 25                               | 14341     | 0.73            | 0.013           | 0.029 | 6.67E-01 | 0.0                | 1.18E-04       |
| rs9302604                       | 16:69576894     | G/A   | 0.44                       | 0.019 | 0.003 | 3.29E-13 | 25                               | 14341     | 0.43            | -0.008          | 0.027 | 7.71E-01 | 0.0                | 1.72E-04       |
| rs9323328*                      | 14:58653514     | A/G   | 0.46                       | 0.014 | 0.003 | 2.55E-08 | 25                               | 14341     | 0.45            | -0.036          | 0.026 | 1.71E-01 | 0.0                | 1.01E-04       |
| rs9423279                       | 10:125680419    | C/G   | 0.36                       | 0.019 | 0.003 | 3.06E-12 | 1                                | 606       | Excluded for MR |                 |       |          |                    |                |
| rs951740                        | 1:44011737      | A/G   | 0.62                       | 0.030 | 0.003 | 3.82E-29 | 25                               | 14341     | 0.61            | -0.009          | 0.027 | 7.22E-01 | 0.0                | 4.09E-04       |
| rs9540731*                      | 13:66949370     | C/T   | 0.49                       | 0.018 | 0.003 | 3.42E-12 | 25                               | 14340     | 0.50            | -0.042          | 0.030 | 1.58E-01 | 13.3               | 1.57E-04       |
| rs9545155                       | 13:80191873     | T/C   | 0.52                       | 0.016 | 0.003 | 3.04E-10 | 25                               | 14341     | 0.53            | 0.002           | 0.026 | 9.35E-01 | 0.0                | 1.29E-04       |
| rs9826984                       | 3:131945722     | G/A   | 0.46                       | 0.014 | 0.003 | 3.87E-08 | 25                               | 14341     | 0.44            | -0.005          | 0.026 | 8.44E-01 | 0.0                | 9.80E-05       |
| rs9922607                       | 16:17570220     | C/T   | 0.80                       | 0.022 | 0.003 | 3.42E-12 | 25                               | 14341     | 0.80            | -0.011          | 0.033 | 7.36E-01 | 23.2               | 1.57E-04       |
| rs9941217                       | 16:18050926     | C/G   | 0.65                       | 0.019 | 0.003 | 3.50E-12 | 25                               | 14341     | 0.68            | 0.022           | 0.028 | 4.37E-01 | 0.0                | 1.57E-04       |
| <b>rs660895: 1 or 2 alleles</b> |                 |       |                            |       |       |          |                                  |           |                 |                 |       |          |                    |                |
| rs1008078                       | 1:91189731      | T/C   | 0.40                       | 0.023 | 0.003 | 1.63E-18 | 25                               | 6042      | 0.41            | -0.051          | 0.041 | 2.06E-01 | 1.3                | 2.50E-04       |
| rs1022376                       | 2:22067213      | T/C   | 0.48                       | 0.015 | 0.003 | 1.66E-08 | 24                               | 6018      | 0.49            | 0.082           | 0.040 | 4.13E-02 | 23.5               | 1.09E-04       |
| rs10233018                      | 7:117523709     | G/A   | 0.52                       | 0.025 | 0.003 | 4.77E-22 | 25                               | 6042      | 0.50            | 0.024           | 0.040 | 5.53E-01 | 0.0                | 3.03E-04       |
| rs10279261                      | 7:133589846     | G/A   | 0.38                       | 0.019 | 0.003 | 6.05E-13 | 25                               | 6042      | 0.39            | 0.038           | 0.055 | 4.84E-01 | 29.2               | 1.68E-04       |
| rs1030015*                      | 7:78139581      | T/G   | 0.52                       | 0.014 | 0.003 | 2.15E-08 | 25                               | 6042      | 0.51            | 0.012           | 0.050 | 8.03E-01 | 24.1               | 1.02E-04       |
| rs10490159                      | 2:51341259      | T/C   | 0.39                       | 0.017 | 0.003 | 3.86E-11 | 24                               | 6018      | 0.38            | 0.049           | 0.041 | 2.34E-01 | 15.5               | 1.42E-04       |



| SNP         | Chr:Pos(GRCh37) | EA/BA | Smoking initiation (GSCAN) |       |       |          | Parkinson's disease (Courage-PD) |           |                 |                 |       |          |                    |                |  |
|-------------|-----------------|-------|----------------------------|-------|-------|----------|----------------------------------|-----------|-----------------|-----------------|-------|----------|--------------------|----------------|--|
|             |                 |       | EAF                        | Beta  | SE    | P-value  | N studies                        | N samples | EAF             | Beta            | SE    | P-value  | I <sup>2</sup> (%) | R <sup>2</sup> |  |
| rs1050847   | 16:87443734     | C/T   | 0.44                       | 0.015 | 0.003 | 7.37E-09 | 24                               | 6018      | 0.47            | -0.027          | 0.041 | 5.16E-01 | 2.6                | 1.08E-04       |  |
| rs10789369  | 1:73824909      | A/G   | 0.38                       | 0.023 | 0.003 | 3.39E-19 | 25                               | 6042      | 0.42            | -0.039          | 0.041 | 3.49E-01 | 2.1                | 2.60E-04       |  |
| rs10853981  | 19:4965064      | A/G   | 0.33                       | 0.015 | 0.003 | 4.88E-08 | 24                               | 6018      | 0.31            | 0.002           | 0.044 | 9.57E-01 | 14.4               | 9.67E-05       |  |
| rs10858334  | 9:137989785     | G/C   | 0.14                       | 0.023 | 0.004 | 1.18E-09 | 24                               | 6018      | 0.13            | 0.046           | 0.083 | 5.77E-01 | 35.9               | 1.26E-04       |  |
| rs10885480  | 10:115378364    | T/C   | 0.72                       | 0.019 | 0.003 | 3.83E-11 | 25                               | 6042      | 0.72            | 0.006           | 0.045 | 9.03E-01 | 0.0                | 1.42E-04       |  |
| rs10914684  | 1:33795572      | G/A   | 0.68                       | 0.016 | 0.003 | 6.32E-09 | 25                               | 6042      | 0.67            | 0.035           | 0.055 | 5.31E-01 | 27.5               | 1.09E-04       |  |
| rs10945141  | 6:69470709      | A/G   | 0.26                       | 0.018 | 0.003 | 3.59E-10 | 24                               | 6018      | 0.26            | 0.044           | 0.045 | 3.23E-01 | 0.0                | 1.28E-04       |  |
| rs10953957  | 7:121954709     | A/G   | 0.39                       | 0.014 | 0.003 | 3.66E-08 | 25                               | 6042      | 0.39            | 0.002           | 0.041 | 9.61E-01 | 0.0                | 9.84E-05       |  |
| rs10966092  | 9:23831658      | T/C   | 0.73                       | 0.020 | 0.003 | 1.12E-12 | 25                               | 6042      | 0.73            | -0.002          | 0.044 | 9.59E-01 | 0.0                | 1.64E-04       |  |
| rs11057005  | 12:16748721     | A/G   | 0.56                       | 0.016 | 0.003 | 9.12E-10 | 25                               | 6042      | 0.58            | -0.040          | 0.042 | 3.38E-01 | 0.0                | 1.22E-04       |  |
| rs1106363   | 11:131966264    | T/C   | 0.34                       | 0.017 | 0.003 | 9.20E-11 | 25                               | 6042      | 0.36            | -0.007          | 0.041 | 8.68E-01 | 14.8               | 1.36E-04       |  |
| rs11076962  | 16:5811367      | C/T   | 0.28                       | 0.018 | 0.003 | 1.20E-10 | 25                               | 6042      | 0.28            | -0.071          | 0.045 | 1.11E-01 | 5.6                | 1.35E-04       |  |
| rs1108130   | 13:100648356    | A/T   | 0.21                       | 0.024 | 0.003 | 1.57E-14 | 24                               | 6018      | 0.21            | 0.014           | 0.050 | 7.79E-01 | 0.0                | 1.92E-04       |  |
| rs1109480   | 12:121083279    | G/A   | 0.62                       | 0.017 | 0.003 | 1.84E-10 | 25                               | 6042      | 0.62            | -0.040          | 0.042 | 3.41E-01 | 0.0                | 1.32E-04       |  |
| rs11128203  | 3:71064431      | A/T   | 0.53                       | 0.020 | 0.003 | 1.29E-15 | 12                               | 3141      | Excluded for MR |                 |       |          |                    |                |  |
| rs11162019  | 1:87913176      | C/T   | 0.64                       | 0.015 | 0.003 | 5.06E-09 | 25                               | 6042      | 0.65            | 0.009           | 0.042 | 8.30E-01 | 20.2               | 1.11E-04       |  |
| rs1116690   | 4:143510148     | G/A   | 0.74                       | 0.016 | 0.003 | 2.16E-08 | 23                               | 5958      | 0.72            | -0.009          | 0.047 | 8.49E-01 | 23.3               | 1.02E-04       |  |
| rs1126757*  | 19:55879872     | T/C   | 0.47                       | 0.014 | 0.003 | 2.92E-08 | 24                               | 6013      | 0.47            | 0.028           | 0.049 | 5.68E-01 | 23.5               | 1.00E-04       |  |
| rs112725451 | 4:68017710      | T/C   | 0.17                       | 0.026 | 0.003 | 1.65E-14 | 24                               | 6018      | 0.18            | -0.045          | 0.052 | 3.90E-01 | 12.1               | 1.91E-04       |  |
| rs113230003 | 19:18460956     | G/A   | 0.74                       | 0.019 | 0.003 | 1.05E-10 | 25                               | 6042      | 0.76            | -0.005          | 0.048 | 9.11E-01 | 0.0                | 1.35E-04       |  |
| rs1139897   | 16:720986       | G/A   | 0.77                       | 0.024 | 0.003 | 1.77E-15 | 24                               | 5942      | 0.77            | 0.024           | 0.049 | 6.20E-01 | 0.0                | 2.06E-04       |  |
| rs1150668   | 6:28129789      | T/G   | 0.58                       | 0.019 | 0.003 | 8.54E-13 | 25                               | 6042      | 0.62            | -0.102          | 0.042 | 1.55E-02 | 22.6               | 1.67E-04       |  |
| rs11594623  | 10:103960351    | C/T   | 0.23                       | 0.027 | 0.003 | 7.45E-20 | 25                               | 6042      | 0.22            | -0.014          | 0.048 | 7.77E-01 | 10.2               | 2.70E-04       |  |
| rs1160685   | 4:94052854      | G/C   | 0.45                       | 0.015 | 0.003 | 2.31E-09 | 25                               | 6042      | 0.48            | Excluded for MR |       |          |                    |                |  |
| rs11611651  | 12:133380790    | A/G   | 0.09                       | 0.027 | 0.005 | 2.05E-09 | 25                               | 6042      | 0.08            | -0.017          | 0.075 | 8.20E-01 | 0.0                | 1.17E-04       |  |
| rs11642231  | 16:89608702     | G/A   | 0.63                       | 0.016 | 0.003 | 3.44E-09 | 25                               | 6042      | 0.65            | 0.125           | 0.042 | 3.18E-03 | 8.4                | 1.13E-04       |  |
| rs11713899  | 3:2365026       | C/A   | 0.17                       | 0.019 | 0.003 | 3.15E-08 | 25                               | 6042      | 0.17            | -0.006          | 0.053 | 9.10E-01 | 0.0                | 9.93E-05       |  |
| rs6050446†  | 20:25195509     | G/C   | 0.95                       | 0.054 | 0.008 | 8.80E-13 | 17                               | 5235      | 0.97            | 0.004           | 0.134 | 9.74E-01 | 0.0                | 2.81E-04       |  |
| rs117657830 | 16:75766873     | A/G   | 0.96                       | 0.038 | 0.006 | 3.18E-09 | 25                               | 6042      | 0.96            | 0.057           | 0.104 | 5.85E-01 | 0.0                | 1.14E-04       |  |
| rs11768481  | 7:96629103      | C/A   | 0.66                       | 0.019 | 0.003 | 5.23E-12 | 7                                | 2483      | Excluded for MR |                 |       |          |                    |                |  |
| rs117734003 | 19:51129745     | C/G   | 0.07                       | 0.030 | 0.005 | 2.57E-09 | 17                               | 4773      | Excluded for MR |                 |       |          |                    |                |  |
| rs11783093  | 8:27425349      | C/T   | 0.84                       | 0.047 | 0.003 | 2.07E-41 | 24                               | 6018      | 0.84            | -0.009          | 0.054 | 8.73E-01 | 7.8                | 5.91E-04       |  |
| rs11791671  | 9:3398679       | T/C   | 0.07                       | 0.028 | 0.005 | 4.24E-08 | 25                               | 6042      | 0.07            | 0.028           | 0.084 | 7.36E-01 | 9.6                | 9.74E-05       |  |
| rs118202    | 6:111658371     | G/T   | 0.19                       | 0.037 | 0.003 | 1.90E-29 | 25                               | 6042      | 0.21            | -0.116          | 0.052 | 2.51E-02 | 0.0                | 4.12E-04       |  |
| rs1187820   | 3:173072584     | C/T   | 0.56                       | 0.014 | 0.003 | 2.69E-08 | 25                               | 6042      | 0.57            | 0.007           | 0.043 | 8.77E-01 | 0.0                | 1.00E-04       |  |
| rs12022778  | 1:50603995      | C/A   | 0.20                       | 0.027 | 0.003 | 3.18E-17 | 25                               | 6042      | 0.18            | 0.066           | 0.067 | 3.24E-01 | 29.6               | 2.32E-04       |  |
| rs12027999  | 1:154206358     | T/C   | 0.88                       | 0.024 | 0.004 | 5.33E-10 | 24                               | 6018      | 0.89            | -0.084          | 0.065 | 1.95E-01 | 8.3                | 1.25E-04       |  |
| rs12130857  | 1:7791461       | G/A   | 0.68                       | 0.018 | 0.003 | 3.65E-11 | 25                               | 6042      | 0.69            | -0.021          | 0.043 | 6.32E-01 | 0.0                | 1.42E-04       |  |
| rs12195240  | 6:98636905      | A/G   | 0.28                       | 0.025 | 0.003 | 1.08E-18 | 25                               | 6042      | 0.28            | 0.060           | 0.044 | 1.74E-01 | 0.0                | 2.53E-04       |  |

| SNP         | Chr:Pos(GRCh37) | EA/BA | Smoking initiation (GSCAN) |       |       |          | Parkinson's disease (Courage-PD) |           |                 |                 |       |          |                    |                |
|-------------|-----------------|-------|----------------------------|-------|-------|----------|----------------------------------|-----------|-----------------|-----------------|-------|----------|--------------------|----------------|
|             |                 |       | EAF                        | Beta  | SE    | P-value  | N studies                        | N samples | EAF             | Beta            | SE    | P-value  | I <sup>2</sup> (%) | R <sup>2</sup> |
| rs12244388  | 10:104640052    | A/G   | 0.35                       | 0.026 | 0.003 | 4.31E-22 | 25                               | 6042      | 0.35            | -0.020          | 0.041 | 6.27E-01 | 4.8                | 3.03E-04       |
| rs12474587  | 2:162802993     | T/G   | 0.43                       | 0.024 | 0.003 | 4.83E-21 | 25                               | 6042      | 0.40            | 0.046           | 0.042 | 2.70E-01 | 0.0                | 2.88E-04       |
| rs12517438  | 5:30842054      | G/T   | 0.54                       | 0.015 | 0.003 | 1.89E-09 | 24                               | 6018      | 0.51            | 0.003           | 0.040 | 9.44E-01 | 0.0                | 1.17E-04       |
| rs12633090  | 3:83241365      | G/C   | 0.82                       | 0.023 | 0.003 | 3.16E-12 | 24                               | 6018      | 0.80            | 0.090           | 0.051 | 7.54E-02 | 13.7               | 1.58E-04       |
| rs12714017  | 2:80999398      | C/T   | 0.51                       | 0.015 | 0.003 | 3.65E-09 | 25                               | 6042      | 0.51            | -0.020          | 0.059 | 7.31E-01 | 42.7               | 1.18E-04       |
| rs12739243  | 1:210302043     | T/C   | 0.78                       | 0.021 | 0.003 | 4.45E-12 | 25                               | 6042      | 0.78            | 0.078           | 0.061 | 1.98E-01 | 26.6               | 1.56E-04       |
| rs12878369  | 14:28346502     | A/C   | 0.41                       | 0.017 | 0.003 | 1.60E-11 | 25                               | 6042      | 0.42            | -0.033          | 0.040 | 4.14E-01 | 18.2               | 1.48E-04       |
| rs12918191  | 16:50945156     | A/G   | 0.76                       | 0.020 | 0.003 | 3.14E-11 | 25                               | 6042      | 0.76            | 0.021           | 0.047 | 6.51E-01 | 0.0                | 1.43E-04       |
| rs1291821   | 10:11133823     | G/A   | 0.53                       | 0.014 | 0.003 | 1.39E-08 | 24                               | 6018      | 0.54            | 0.044           | 0.041 | 2.77E-01 | 11.4               | 1.05E-04       |
| rs13007361  | 2:166250244     | A/G   | 0.21                       | 0.018 | 0.003 | 2.29E-08 | 24                               | 6018      | 0.20            | 0.065           | 0.049 | 1.81E-01 | 0.0                | 1.01E-04       |
| rs13110073  | 4:147797913     | T/C   | 0.60                       | 0.025 | 0.003 | 3.24E-21 | 24                               | 6018      | 0.61            | -0.009          | 0.041 | 8.19E-01 | 3.7                | 2.90E-04       |
| rs13261666  | 8:59814666      | G/T   | 0.48                       | 0.020 | 0.003 | 4.36E-15 | 24                               | 6018      | 0.48            | -0.002          | 0.040 | 9.63E-01 | 0.0                | 2.00E-04       |
| rs13392222  | 2:100672408     | A/C   | 0.86                       | 0.023 | 0.004 | 1.93E-10 | 25                               | 6042      | 0.86            | 0.058           | 0.077 | 4.56E-01 | 29.1               | 1.31E-04       |
| rs13437771  | 7:99071478      | A/G   | 0.84                       | 0.027 | 0.004 | 1.39E-14 | 25                               | 6042      | 0.85            | -0.062          | 0.056 | 2.67E-01 | 0.0                | 1.93E-04       |
| rs1373178   | 18:49967811     | T/G   | 0.41                       | 0.020 | 0.003 | 4.16E-15 | 25                               | 6042      | 0.42            | -0.014          | 0.041 | 7.42E-01 | 16.3               | 2.00E-04       |
| rs1381287   | 14:98597552     | T/C   | 0.47                       | 0.018 | 0.003 | 1.81E-12 | 25                               | 6042      | 0.48            | 0.013           | 0.040 | 7.46E-01 | 15.1               | 1.62E-04       |
| rs1381775   | 11:42442826     | T/C   | 0.29                       | 0.016 | 0.003 | 2.79E-08 | 25                               | 6042      | 0.29            | 0.032           | 0.045 | 4.67E-01 | 0.0                | 1.00E-04       |
| rs1385108   | 5:154839646     | T/C   | 0.24                       | 0.019 | 0.003 | 3.84E-10 | 24                               | 6018      | 0.22            | 0.065           | 0.047 | 1.68E-01 | 0.0                | 1.27E-04       |
| rs13906     | 12:49952394     | C/T   | 0.89                       | 0.025 | 0.004 | 1.98E-09 | 25                               | 6042      | 0.88            | 0.014           | 0.063 | 8.27E-01 | 0.0                | 1.17E-04       |
| rs1435672   | 15:36399479     | C/T   | 0.56                       | 0.014 | 0.003 | 3.82E-08 | 25                               | 6042      | 0.53            | 0.054           | 0.040 | 1.84E-01 | 16.4               | 9.80E-05       |
| rs1445649   | 2:155682556     | C/T   | 0.54                       | 0.021 | 0.003 | 8.48E-16 | 24                               | 6018      | 0.54            | -0.039          | 0.040 | 3.33E-01 | 0.0                | 2.10E-04       |
| rs1449012   | 3:159048333     | C/T   | 0.54                       | 0.015 | 0.003 | 1.77E-09 | 25                               | 6042      | 0.54            | -0.014          | 0.040 | 7.22E-01 | 0.0                | 1.18E-04       |
| rs147052174 | 1:179783167     | T/G   | 0.02                       | 0.062 | 0.010 | 2.30E-10 | 15                               | 3709      | Excluded for MR |                 |       |          |                    |                |
| rs1514176   | 1:74991596      | G/A   | 0.42                       | 0.019 | 0.003 | 7.67E-14 | 24                               | 6018      | 0.43            | 0.024           | 0.041 | 5.55E-01 | 0.0                | 1.81E-04       |
| rs1549979   | 3:85460131      | C/T   | 0.38                       | 0.025 | 0.003 | 8.80E-21 | 24                               | 6018      | 0.40            | -0.090          | 0.040 | 2.57E-02 | 0.0                | 2.85E-04       |
| rs160631    | 6:52895230      | T/G   | 0.27                       | 0.017 | 0.003 | 1.87E-09 | 25                               | 6042      | 0.29            | 0.017           | 0.045 | 7.06E-01 | 0.0                | 1.17E-04       |
| rs16826827  | 2:147825689     | T/C   | 0.88                       | 0.022 | 0.004 | 9.17E-09 | 25                               | 6042      | 0.88            | Excluded for MR |       |          |                    |                |
| rs1713676*  | 11:113660576    | A/G   | 0.48                       | 0.017 | 0.003 | 5.38E-11 | 24                               | 6018      | 0.47            | 0.031           | 0.040 | 4.44E-01 | 0.0                | 1.40E-04       |
| rs1714521   | 3:158284861     | A/C   | 0.59                       | 0.016 | 0.003 | 3.07E-10 | 24                               | 6018      | 0.60            | -0.006          | 0.040 | 8.78E-01 | 0.0                | 1.29E-04       |
| rs17197663  | 13:38172867     | G/A   | 0.88                       | 0.022 | 0.004 | 2.06E-08 | 24                               | 6018      | 0.87            | 0.042           | 0.084 | 6.17E-01 | 35.9               | 1.02E-04       |
| rs17229285  | 2:199523122     | C/T   | 0.50                       | 0.015 | 0.003 | 1.27E-09 | 25                               | 6042      | 0.51            | 0.007           | 0.040 | 8.62E-01 | 0.0                | 1.20E-04       |
| rs1733760   | 10:56698174     | C/T   | 0.51                       | 0.015 | 0.003 | 6.70E-09 | 25                               | 6042      | 0.50            | 0.020           | 0.041 | 6.31E-01 | 0.0                | 1.09E-04       |
| rs1737329   | 6:163807748     | G/C   | 0.74                       | 0.017 | 0.003 | 5.08E-09 | 25                               | 6042      | 0.74            | -0.011          | 0.047 | 8.21E-01 | 17.0               | 1.11E-04       |
| rs17554906  | 6:92226609      | C/G   | 0.44                       | 0.014 | 0.003 | 3.14E-08 | 24                               | 6018      | 0.43            | Excluded for MR |       |          |                    |                |
| rs1772572   | 13:81191176     | C/A   | 0.68                       | 0.017 | 0.003 | 5.62E-10 | 25                               | 6042      | 0.69            | -0.047          | 0.042 | 2.66E-01 | 0.0                | 1.25E-04       |
| rs1811739   | 14:77529375     | A/G   | 0.25                       | 0.018 | 0.003 | 5.97E-10 | 25                               | 6042      | 0.24            | 0.063           | 0.065 | 3.31E-01 | 36.9               | 1.25E-04       |
| rs1889571   | 1:32195819      | G/T   | 0.13                       | 0.022 | 0.004 | 4.19E-09 | 25                               | 6042      | 0.12            | 0.080           | 0.061 | 1.88E-01 | 2.6                | 1.12E-04       |
| rs1901477   | 2:104126983     | G/A   | 0.51                       | 0.030 | 0.003 | 2.07E-31 | 25                               | 6042      | 0.51            | 0.060           | 0.040 | 1.36E-01 | 4.6                | 4.63E-04       |
| rs2010921   | 11:132098205    | A/G   | 0.31                       | 0.017 | 0.003 | 2.47E-10 | 25                               | 6042      | 0.29            | 0.071           | 0.044 | 1.06E-01 | 0.0                | 1.30E-04       |

| SNP        | Chr:Pos(GRCh37) | EA/BA | Smoking initiation (GSCAN) |       |       |          | Parkinson's disease (Courage-PD) |           |                 |                 |       |          |                    |                |  |
|------------|-----------------|-------|----------------------------|-------|-------|----------|----------------------------------|-----------|-----------------|-----------------|-------|----------|--------------------|----------------|--|
|            |                 |       | EAF                        | Beta  | SE    | P-value  | N studies                        | N samples | EAF             | Beta            | SE    | P-value  | I <sup>2</sup> (%) | R <sup>2</sup> |  |
| rs2063976  | 8:91096366      | C/T   | 0.34                       | 0.020 | 0.003 | 7.45E-14 | 25                               | 6042      | 0.34            | -0.002          | 0.042 | 9.67E-01 | 0.0                | 1.81E-04       |  |
| rs2155646  | 11:112912811    | C/T   | 0.40                       | 0.038 | 0.003 | 9.44E-48 | 25                               | 6042      | 0.39            | 0.055           | 0.040 | 1.76E-01 | 0.0                | 6.85E-04       |  |
| rs2173019  | 5:167614971     | A/T   | 0.18                       | 0.028 | 0.003 | 2.98E-17 | 25                               | 6042      | 0.16            | 0.088           | 0.053 | 9.77E-02 | 0.0                | 2.32E-04       |  |
| rs221988   | 3:64234307      | A/C   | 0.62                       | 0.015 | 0.003 | 1.43E-08 | 25                               | 6042      | 0.62            | 0.006           | 0.042 | 8.82E-01 | 22.3               | 1.05E-04       |  |
| rs2279829  | 3:147106319     | C/T   | 0.78                       | 0.017 | 0.003 | 2.05E-08 | 25                               | 6042      | 0.79            | 0.014           | 0.050 | 7.82E-01 | 9.1                | 1.02E-04       |  |
| rs2289791  | 15:67476952     | G/T   | 0.75                       | 0.018 | 0.003 | 2.01E-09 | 12                               | 3141      | Excluded for MR |                 |       |          |                    |                |  |
| rs2319545  | 3:147719648     | A/C   | 0.15                       | 0.023 | 0.004 | 8.30E-11 | 25                               | 6042      | 0.13            | 0.037           | 0.060 | 5.36E-01 | 0.0                | 1.37E-04       |  |
| rs2378662  | 9:86707289      | A/G   | 0.54                       | 0.015 | 0.003 | 2.67E-09 | 25                               | 6042      | 0.53            | 0.068           | 0.041 | 9.51E-02 | 0.0                | 1.15E-04       |  |
| rs2526390  | 3:50192760      | T/C   | 0.33                       | 0.020 | 0.003 | 3.62E-14 | 25                               | 6042      | 0.34            | -0.008          | 0.042 | 8.41E-01 | 0.0                | 1.86E-04       |  |
| rs2587507* | 17:77790135     | T/C   | 0.50                       | 0.015 | 0.003 | 8.69E-09 | 25                               | 6039      | 0.51            | -0.032          | 0.050 | 5.25E-01 | 23.1               | 1.07E-04       |  |
| rs2710634  | 2:32808804      | T/C   | 0.48                       | 0.018 | 0.003 | 3.36E-12 | 25                               | 6042      | 0.50            | -0.050          | 0.041 | 2.20E-01 | 0.0                | 1.57E-04       |  |
| rs2796793  | 10:36634124     | A/G   | 0.45                       | 0.014 | 0.003 | 1.55E-08 | 24                               | 5725      | 0.43            | 0.032           | 0.041 | 4.33E-01 | 0.0                | 1.04E-04       |  |
| rs281296   | 15:47685010     | A/G   | 0.36                       | 0.025 | 0.003 | 1.59E-20 | 24                               | 6018      | 0.37            | -0.071          | 0.042 | 9.22E-02 | 4.6                | 2.80E-04       |  |
| rs28441558 | 17:7803118      | T/C   | 0.94                       | 0.036 | 0.006 | 1.24E-10 | 17                               | 4773      | Excluded for MR |                 |       |          |                    |                |  |
| rs2901785  | 1:174104743     | G/A   | 0.55                       | 0.017 | 0.003 | 1.47E-11 | 25                               | 6042      | 0.54            | 0.090           | 0.040 | 2.57E-02 | 23.8               | 1.48E-04       |  |
| rs290601   | 8:115374642     | T/C   | 0.27                       | 0.016 | 0.003 | 1.14E-08 | 24                               | 6018      | 0.27            | -0.035          | 0.045 | 4.31E-01 | 9.5                | 1.06E-04       |  |
| rs2925128  | 14:98362355     | T/C   | 0.39                       | 0.017 | 0.003 | 3.67E-10 | 25                               | 6042      | 0.37            | 0.088           | 0.041 | 3.26E-02 | 4.0                | 1.34E-04       |  |
| rs2939756  | 11:41436297     | G/A   | 0.52                       | 0.016 | 0.003 | 7.45E-10 | 25                               | 6042      | 0.54            | -0.016          | 0.040 | 6.98E-01 | 6.6                | 1.23E-04       |  |
| rs3218116  | 6:41901763      | C/T   | 0.74                       | 0.020 | 0.003 | 1.05E-11 | 24                               | 6018      | 0.77            | -0.087          | 0.047 | 6.62E-02 | 0.0                | 1.50E-04       |  |
| rs329124   | 5:133865452     | A/G   | 0.57                       | 0.016 | 0.003 | 1.96E-10 | 25                               | 6042      | 0.58            | -0.041          | 0.040 | 3.07E-01 | 0.0                | 1.31E-04       |  |
| rs34342129 | 18:5872472      | T/C   | 0.49                       | 0.014 | 0.003 | 2.13E-08 | 24                               | 6018      | 0.51            | -0.066          | 0.054 | 2.20E-01 | 32.9               | 1.02E-04       |  |
| rs34399632 | 2:137571174     | G/A   | 0.23                       | 0.019 | 0.003 | 1.46E-10 | 24                               | 6018      | 0.20            | 0.038           | 0.065 | 5.62E-01 | 28.3               | 1.33E-04       |  |
| rs34553878 | 9:134334588     | G/A   | 0.11                       | 0.025 | 0.004 | 1.17E-09 | 17                               | 4901      | Excluded for MR |                 |       |          |                    |                |  |
| rs35375873 | 5:43190647      | G/C   | 0.89                       | 0.027 | 0.004 | 3.29E-11 | 17                               | 4773      | Excluded for MR |                 |       |          |                    |                |  |
| rs35656245 | 1:190957480     | A/G   | 0.28                       | 0.016 | 0.003 | 2.23E-08 | 25                               | 6042      | 0.28            | 0.054           | 0.044 | 2.15E-01 | 0.0                | 1.02E-04       |  |
| rs359247   | 2:60477052      | T/A   | 0.64                       | 0.022 | 0.003 | 9.89E-17 | 25                               | 6042      | 0.62            | -0.049          | 0.042 | 2.35E-01 | 11.4               | 2.24E-04       |  |
| rs3764351  | 17:37824339     | G/A   | 0.34                       | 0.015 | 0.003 | 3.89E-08 | 25                               | 6042      | 0.36            | 0.057           | 0.043 | 1.82E-01 | 0.0                | 9.80E-05       |  |
| rs3810496  | 20:62406886     | C/T   | 0.62                       | 0.016 | 0.003 | 1.54E-09 | 24                               | 6018      | 0.61            | 0.057           | 0.043 | 1.90E-01 | 19.3               | 1.19E-04       |  |
| rs3811038  | 2:113240183     | C/T   | 0.28                       | 0.019 | 0.003 | 1.58E-11 | 25                               | 6042      | 0.27            | 0.034           | 0.062 | 5.82E-01 | 35.6               | 1.47E-04       |  |
| rs3820277  | 1:18436657      | G/T   | 0.47                       | 0.019 | 0.003 | 1.57E-13 | 25                               | 6042      | 0.50            | -0.039          | 0.040 | 3.37E-01 | 0.0                | 1.77E-04       |  |
| rs3847244  | 9:3025368       | T/C   | 0.47                       | 0.019 | 0.003 | 2.60E-13 | 25                               | 6042      | 0.47            | 0.001           | 0.041 | 9.86E-01 | 0.0                | 1.74E-04       |  |
| rs3850736  | 8:64912021      | G/C   | 0.47                       | 0.019 | 0.003 | 6.43E-14 | 25                               | 6042      | 0.46            | Excluded for MR |       |          |                    |                |  |
| rs3934797  | 4:112467612     | G/A   | 0.82                       | 0.021 | 0.003 | 1.12E-10 | 25                               | 6042      | 0.83            | -0.042          | 0.054 | 4.36E-01 | 0.0                | 1.35E-04       |  |
| rs4044321  | 5:166989513     | A/G   | 0.36                       | 0.023 | 0.003 | 1.75E-17 | 25                               | 6042      | 0.36            | -0.007          | 0.043 | 8.70E-01 | 0.0                | 2.35E-04       |  |
| rs4140932  | 4:15458598      | T/A   | 0.57                       | 0.014 | 0.003 | 4.89E-08 | 24                               | 6018      | 0.57            | Excluded for MR |       |          |                    |                |  |
| rs42417    | 5:94198290      | T/C   | 0.69                       | 0.017 | 0.003 | 8.27E-10 | 25                               | 6042      | 0.69            | -0.029          | 0.045 | 5.24E-01 | 0.0                | 1.22E-04       |  |
| rs4264267  | 13:38359676     | T/C   | 0.53                       | 0.015 | 0.003 | 6.82E-09 | 24                               | 6018      | 0.53            | 0.020           | 0.041 | 6.28E-01 | 0.0                | 1.09E-04       |  |
| rs4310804  | 15:96858409     | C/G   | 0.75                       | 0.018 | 0.003 | 7.55E-10 | 22                               | 5296      | 0.76            | 0.131           | 0.054 | 1.52E-02 | 0.0                | 1.23E-04       |  |
| rs4326350  | 8:10763655      | C/G   | 0.51                       | 0.018 | 0.003 | 5.16E-12 | 25                               | 6042      | 0.53            | Excluded for MR |       |          |                    |                |  |

| SNP        | Chr:Pos(GRCh37) | EA/BA | Smoking initiation (GSCAN) |       |       |          | Parkinson's disease (Courage-PD) |           |                 |        |       |          |                    |                |  |
|------------|-----------------|-------|----------------------------|-------|-------|----------|----------------------------------|-----------|-----------------|--------|-------|----------|--------------------|----------------|--|
|            |                 |       | EAF                        | Beta  | SE    | P-value  | N studies                        | N samples | EAF             | Beta   | SE    | P-value  | I <sup>2</sup> (%) | R <sup>2</sup> |  |
| rs4476253  | 18:25253297     | G/A   | 0.76                       | 0.018 | 0.003 | 5.78E-10 | 24                               | 6018      | 0.77            | -0.043 | 0.048 | 3.75E-01 | 0.0                | 1.25E-04       |  |
| rs45444697 | 1:155034632     | G/C   | 0.21                       | 0.020 | 0.003 | 2.72E-10 | 25                               | 6042      | 0.20            | -0.009 | 0.051 | 8.54E-01 | 0.0                | 1.30E-04       |  |
| rs4674993  | 2:226332033     | A/G   | 0.80                       | 0.024 | 0.003 | 4.85E-14 | 24                               | 6018      | 0.81            | 0.027  | 0.052 | 6.08E-01 | 13.6               | 1.84E-04       |  |
| rs4727189  | 7:88442568      | C/T   | 0.34                       | 0.015 | 0.003 | 3.00E-08 | 25                               | 6042      | 0.35            | 0.035  | 0.041 | 3.96E-01 | 15.2               | 9.97E-05       |  |
| rs4752018  | 10:118678712    | A/C   | 0.23                       | 0.019 | 0.003 | 4.42E-10 | 24                               | 6018      | 0.22            | 0.001  | 0.066 | 9.91E-01 | 37.4               | 1.26E-04       |  |
| rs4759229  | 12:56474480     | G/A   | 0.66                       | 0.016 | 0.003 | 6.53E-09 | 24                               | 6018      | 0.64            | -0.018 | 0.043 | 6.76E-01 | 0.0                | 1.09E-04       |  |
| rs4790874  | 17:1995177      | T/C   | 0.53                       | 0.017 | 0.003 | 8.43E-12 | 25                               | 6042      | 0.52            | 0.043  | 0.041 | 2.95E-01 | 0.0                | 1.52E-04       |  |
| rs4818005  | 21:40588819     | G/A   | 0.42                       | 0.020 | 0.003 | 1.09E-14 | 25                               | 6042      | 0.44            | -0.058 | 0.040 | 1.51E-01 | 12.2               | 2.03E-04       |  |
| rs4822102  | 22:42698430     | C/T   | 0.38                       | 0.017 | 0.003 | 2.78E-10 | 25                               | 6042      | 0.38            | 0.087  | 0.041 | 3.27E-02 | 0.0                | 1.29E-04       |  |
| rs4837631  | 9:122061948     | C/T   | 0.55                       | 0.015 | 0.003 | 2.03E-09 | 24                               | 6018      | 0.56            | 0.045  | 0.041 | 2.67E-01 | 0.0                | 1.17E-04       |  |
| rs4877285  | 9:81354129      | G/A   | 0.33                       | 0.018 | 0.003 | 2.10E-11 | 25                               | 6042      | 0.35            | -0.052 | 0.044 | 2.36E-01 | 2.8                | 1.46E-04       |  |
| rs4912332  | 1:58815243      | T/C   | 0.49                       | 0.014 | 0.003 | 2.94E-08 | 25                               | 6042      | 0.48            | 0.047  | 0.041 | 2.51E-01 | 0.0                | 9.97E-05       |  |
| rs540860   | 11:121530888    | G/A   | 0.54                       | 0.018 | 0.003 | 5.75E-12 | 25                               | 6042      | 0.52            | 0.048  | 0.040 | 2.25E-01 | 0.0                | 1.54E-04       |  |
| rs55786907 | 13:59871584     | G/A   | 0.16                       | 0.019 | 0.003 | 1.84E-08 | 25                               | 6042      | 0.16            | -0.016 | 0.055 | 7.74E-01 | 10.9               | 1.03E-04       |  |
| rs58400863 | 4:31184484      | G/A   | 0.65                       | 0.020 | 0.003 | 4.89E-14 | 25                               | 6042      | 0.64            | 0.012  | 0.042 | 7.74E-01 | 0.0                | 1.84E-04       |  |
| rs59537158 | 4:28246049      | T/C   | 0.21                       | 0.022 | 0.003 | 4.62E-13 | 24                               | 6018      | 0.21            | -0.057 | 0.051 | 2.58E-01 | 0.0                | 1.70E-04       |  |
| rs6073075  | 20:42015801     | T/A   | 0.18                       | 0.019 | 0.003 | 2.44E-08 | 25                               | 6042      | 0.18            | 0.036  | 0.053 | 4.92E-01 | 0.0                | 1.01E-04       |  |
| rs61533748 | 2:22582968      | C/T   | 0.38                       | 0.017 | 0.003 | 2.82E-11 | 25                               | 6042      | 0.38            | -0.015 | 0.041 | 7.13E-01 | 1.6                | 1.44E-04       |  |
| rs61886926 | 11:64133552     | C/T   | 0.62                       | 0.018 | 0.003 | 7.30E-12 | 25                               | 6042      | 0.63            | -0.008 | 0.041 | 8.56E-01 | 24.2               | 1.52E-04       |  |
| rs61959481 | 13:55834929     | G/A   | 0.79                       | 0.020 | 0.003 | 7.95E-11 | 25                               | 6042      | 0.78            | 0.017  | 0.049 | 7.26E-01 | 19.8               | 1.37E-04       |  |
| rs62007780 | 15:78025464     | G/T   | 0.58                       | 0.016 | 0.003 | 7.48E-10 | 25                               | 6042      | 0.60            | -0.036 | 0.059 | 5.42E-01 | 40.8               | 1.23E-04       |  |
| rs62193862 | 2:202843875     | A/G   | 0.10                       | 0.024 | 0.004 | 1.99E-08 | 14                               | 4159      | Excluded for MR |        |       |          |                    |                |  |
| rs62246017 | 3:71483084      | G/A   | 0.68                       | 0.016 | 0.003 | 3.03E-09 | 25                               | 6042      | 0.69            | -0.065 | 0.059 | 2.74E-01 | 31.4               | 1.14E-04       |  |
| rs62340589 | 4:176875795     | C/G   | 0.20                       | 0.017 | 0.003 | 4.31E-08 | 24                               | 6018      | 0.20            | -0.022 | 0.051 | 6.60E-01 | 0.0                | 9.74E-05       |  |
| rs6265*    | 11:27679916     | C/T   | 0.81                       | 0.029 | 0.003 | 2.81E-19 | 25                               | 6042      | 0.80            | 0.030  | 0.051 | 5.53E-01 | 0.0                | 2.62E-04       |  |
| rs6437769  | 3:107997514     | T/C   | 0.58                       | 0.014 | 0.003 | 3.74E-08 | 24                               | 6018      | 0.59            | -0.038 | 0.041 | 3.59E-01 | 0.0                | 9.84E-05       |  |
| rs6438436  | 3:117822149     | T/C   | 0.82                       | 0.025 | 0.003 | 5.33E-14 | 25                               | 6042      | 0.81            | 0.079  | 0.053 | 1.37E-01 | 0.0                | 1.84E-04       |  |
| rs644740   | 11:65561468     | C/T   | 0.54                       | 0.014 | 0.003 | 3.67E-08 | 25                               | 6042      | 0.54            | 0.030  | 0.040 | 4.49E-01 | 0.0                | 9.84E-05       |  |
| rs6452785  | 5:87685500      | C/T   | 0.53                       | 0.027 | 0.003 | 4.69E-26 | 25                               | 6042      | 0.52            | -0.040 | 0.040 | 3.24E-01 | 0.0                | 3.60E-04       |  |
| rs6497840  | 16:25351633     | A/G   | 0.71                       | 0.023 | 0.003 | 2.01E-15 | 25                               | 6042      | 0.70            | -0.033 | 0.044 | 4.62E-01 | 0.0                | 2.15E-04       |  |
| rs6568832  | 6:97702876      | A/G   | 0.75                       | 0.019 | 0.003 | 1.74E-10 | 25                               | 6042      | 0.74            | -0.057 | 0.047 | 2.20E-01 | 10.9               | 1.32E-04       |  |
| rs67050670 | 18:39297254     | A/G   | 0.77                       | 0.020 | 0.003 | 2.34E-11 | 25                               | 6042      | 0.74            | 0.128  | 0.046 | 5.68E-03 | 0.0                | 1.45E-04       |  |
| rs6731872  | 2:624205        | G/T   | 0.83                       | 0.032 | 0.003 | 5.35E-21 | 24                               | 6018      | 0.81            | -0.008 | 0.053 | 8.74E-01 | 20.0               | 2.87E-04       |  |
| rs6750529  | 2:182027603     | T/C   | 0.74                       | 0.020 | 0.003 | 9.26E-12 | 25                               | 6042      | 0.76            | -0.007 | 0.068 | 9.21E-01 | 41.7               | 1.51E-04       |  |
| rs6756212  | 2:146140132     | C/T   | 0.47                       | 0.034 | 0.003 | 3.49E-40 | 24                               | 6018      | 0.46            | 0.001  | 0.040 | 9.81E-01 | 0.0                | 5.71E-04       |  |
| rs67777803 | 17:27323322     | G/T   | 0.83                       | 0.025 | 0.003 | 3.18E-13 | 24                               | 6018      | 0.83            | 0.037  | 0.054 | 4.95E-01 | 19.6               | 1.72E-04       |  |
| rs6874731  | 5:80263865      | G/T   | 0.48                       | 0.015 | 0.003 | 1.83E-09 | 24                               | 6018      | 0.47            | 0.010  | 0.040 | 8.03E-01 | 0.0                | 1.17E-04       |  |
| rs6890961  | 5:166778503     | C/T   | 0.38                       | 0.019 | 0.003 | 2.13E-13 | 24                               | 6018      | 0.40            | -0.030 | 0.054 | 5.78E-01 | 26.4               | 1.75E-04       |  |
| rs6936160  | 6:100347745     | T/C   | 0.70                       | 0.020 | 0.003 | 4.20E-13 | 25                               | 6042      | 0.68            | 0.042  | 0.044 | 3.31E-01 | 3.2                | 1.70E-04       |  |

| SNP        | Chr:Pos(GRCh37) | EA/BA | Smoking initiation (GSCAN) |       |       |          | Parkinson's disease (Courage-PD) |           |      |        |       |          |                    |                  |
|------------|-----------------|-------|----------------------------|-------|-------|----------|----------------------------------|-----------|------|--------|-------|----------|--------------------|------------------|
|            |                 |       | EAF                        | Beta  | SE    | P-value  | N studies                        | N samples | EAF  | Beta   | SE    | P-value  | I <sup>2</sup> (%) | R <sup>2</sup>   |
| rs6948707  | 7:1870794       | G/T   | 0.42                       | 0.024 | 0.003 | 4.24E-21 | 25                               | 6042      | 0.41 | 0.005  | 0.040 | 9.06E-01 | 0.0                | 2.89E-04         |
| rs6986430  | 8:93048104      | T/C   | 0.78                       | 0.024 | 0.003 | 1.99E-15 | 24                               | 6018      | 0.76 | 0.117  | 0.047 | 1.28E-02 | 8.7                | 2.05E-04         |
| rs7024924  | 9:8282399       | C/T   | 0.17                       | 0.019 | 0.003 | 1.90E-08 | 24                               | 6018      | 0.17 | 0.023  | 0.053 | 6.69E-01 | 0.0                | 1.03E-04         |
| rs7072776  | 10:22032942     | A/G   | 0.29                       | 0.022 | 0.003 | 5.66E-15 | 24                               | 5725      | 0.33 | -0.010 | 0.063 | 8.78E-01 | 36.0               | 1.98E-04         |
| rs7134009  | 12:75263193     | T/C   | 0.71                       | 0.016 | 0.003 | 4.30E-08 | 25                               | 6042      | 0.71 | -0.019 | 0.044 | 6.66E-01 | 13.0               | 1.02E-04         |
| rs71367544 | 18:77574374     | T/C   | 0.20                       | 0.021 | 0.003 | 8.54E-11 | 24                               | 6018      | 0.18 | 0.008  | 0.052 | 8.86E-01 | 5.4                | 1.37E-04         |
| rs71592686 | 5:60121271      | C/T   | 0.27                       | 0.021 | 0.003 | 3.85E-13 | 25                               | 6042      | 0.26 | 0.049  | 0.045 | 2.72E-01 | 0.0                | 1.71E-04         |
| rs71602617 | 4:136406155     | C/T   | 0.78                       | 0.018 | 0.003 | 2.10E-08 | 25                               | 6042      | 0.79 | 0.018  | 0.049 | 7.11E-01 | 0.0                | 1.07E-04         |
| rs72780746 | 5:103929588     | T/C   | 0.83                       | 0.026 | 0.003 | 2.05E-14 | 25                               | 6042      | 0.82 | -0.051 | 0.052 | 3.27E-01 | 0.0                | 1.90E-04         |
| rs72836318 | 17:44121579     | T/C   | 0.75                       | 0.017 | 0.003 | 7.00E-09 | 25                               | 6042      | 0.76 | -0.098 | 0.060 | 1.02E-01 | 26.2               | 1.09E-04         |
| rs72938304 | 18:53661743     | G/A   | 0.89                       | 0.027 | 0.004 | 1.36E-11 | 25                               | 6042      | 0.89 | -0.021 | 0.064 | 7.41E-01 | 0.0                | 1.48E-04         |
| rs748832   | 3:16851202      | G/A   | 0.37                       | 0.017 | 0.003 | 6.60E-11 | 25                               | 6042      | 0.35 | 0.063  | 0.042 | 1.29E-01 | 0.0                | 1.38E-04         |
| rs75919030 | 17:50193197     | T/C   | 0.73                       | 0.021 | 0.003 | 3.35E-13 | 24                               | 6018      | 0.73 | 0.057  | 0.045 | 2.07E-01 | 0.0                | 1.72E-04         |
| rs7598402  | 2:50735943      | C/G   | 0.51                       | 0.015 | 0.003 | 7.38E-09 | 25                               | 6042      | 0.51 |        |       |          |                    | Excluded for MR  |
| rs7631379  | 3:181409057     | C/T   | 0.21                       | 0.021 | 0.003 | 3.94E-11 | 25                               | 6042      | 0.20 |        |       |          |                    | Excluded for MR  |
| rs76608582 | 19:4474725      | C/A   | 0.95                       | 0.035 | 0.006 | 4.88E-09 |                                  |           |      |        |       |          |                    | NA in Courage-PD |
| rs7696257  | 4:137474783     | A/G   | 0.37                       | 0.015 | 0.003 | 6.78E-09 | 25                               | 6042      | 0.34 | -0.002 | 0.043 | 9.54E-01 | 0.0                | 1.09E-04         |
| rs77215829 | 12:112618346    | A/C   | 0.87                       | 0.024 | 0.004 | 2.02E-10 | 19                               | 4735      | 0.87 | 0.058  | 0.096 | 5.45E-01 | 33.8               | 1.32E-04         |
| rs77283305 | 7:132593831     | G/A   | 0.69                       | 0.015 | 0.003 | 3.91E-08 | 25                               | 6042      | 0.70 | 0.006  | 0.043 | 8.93E-01 | 0.0                | 9.80E-05         |
| rs7743165  | 6:67521222      | G/T   | 0.50                       | 0.019 | 0.003 | 4.15E-14 | 25                               | 6042      | 0.48 | -0.064 | 0.052 | 2.26E-01 | 30.0               | 1.85E-04         |
| rs7809303  | 7:69484366      | G/A   | 0.68                       | 0.021 | 0.003 | 3.48E-15 | 25                               | 6042      | 0.68 | 0.023  | 0.042 | 5.83E-01 | 0.0                | 2.01E-04         |
| rs7836565  | 8:52569449      | C/T   | 0.28                       | 0.016 | 0.003 | 4.36E-08 | 24                               | 6018      | 0.29 | 0.068  | 0.045 | 1.31E-01 | 0.0                | 9.74E-05         |
| rs7920501  | 10:10043159     | T/A   | 0.54                       | 0.016 | 0.003 | 1.25E-09 | 25                               | 6042      | 0.52 |        |       |          |                    | Excluded for MR  |
| rs7921378  | 10:63674885     | G/C   | 0.52                       | 0.023 | 0.003 | 6.10E-20 | 25                               | 6042      | 0.53 |        |       |          |                    | Excluded for MR  |
| rs7929518  | 11:85980958     | G/A   | 0.77                       | 0.019 | 0.003 | 2.55E-10 | 25                               | 6042      | 0.77 | -0.026 | 0.047 | 5.79E-01 | 0.0                | 1.30E-04         |
| rs7943721  | 11:73309393     | G/A   | 0.17                       | 0.021 | 0.003 | 3.58E-10 |                                  |           |      |        |       |          |                    | NA in Courage-PD |
| rs7969559  | 12:69655167     | A/G   | 0.29                       | 0.017 | 0.003 | 1.53E-09 | 25                               | 6042      | 0.32 | 0.014  | 0.044 | 7.46E-01 | 0.0                | 1.18E-04         |
| rs8005334  | 14:79563654     | G/T   | 0.36                       | 0.017 | 0.003 | 3.44E-10 | 25                               | 6042      | 0.35 | -0.023 | 0.042 | 5.80E-01 | 0.0                | 1.28E-04         |
| rs80054503 | 1:72900406      | T/C   | 0.88                       | 0.024 | 0.004 | 3.10E-09 |                                  |           |      |        |       |          |                    | NA in Courage-PD |
| rs8096225  | 18:36921851     | C/A   | 0.70                       | 0.016 | 0.003 | 2.63E-08 | 25                               | 6042      | 0.69 | 0.025  | 0.044 | 5.65E-01 | 0.0                | 1.01E-04         |
| rs876793   | 1:237852083     | T/C   | 0.65                       | 0.018 | 0.003 | 5.69E-11 | 25                               | 6042      | 0.66 | 0.018  | 0.043 | 6.73E-01 | 1.5                | 1.46E-04         |
| rs9288999  | 3:114147927     | A/G   | 0.74                       | 0.017 | 0.003 | 1.50E-09 | 24                               | 6018      | 0.74 | -0.031 | 0.047 | 5.01E-01 | 0.0                | 1.18E-04         |
| rs9302604  | 16:69576894     | G/A   | 0.44                       | 0.019 | 0.003 | 3.29E-13 | 25                               | 6042      | 0.43 | -0.035 | 0.041 | 3.97E-01 | 21.3               | 1.72E-04         |
| rs9323328* | 14:58653514     | A/G   | 0.46                       | 0.014 | 0.003 | 2.55E-08 | 25                               | 6042      | 0.45 | 0.081  | 0.051 | 1.10E-01 | 24.8               | 1.01E-04         |
| rs9423279  | 10:125680419    | C/G   | 0.36                       | 0.019 | 0.003 | 3.06E-12 | 1                                | 413       |      |        |       |          |                    | Excluded for MR  |
| rs951740   | 1:44011737      | A/G   | 0.62                       | 0.030 | 0.003 | 3.82E-29 | 25                               | 6042      | 0.61 | -0.051 | 0.041 | 2.20E-01 | 0.0                | 4.09E-04         |
| rs9540731* | 13:66949370     | C/T   | 0.49                       | 0.018 | 0.003 | 3.42E-12 | 24                               | 6017      | 0.49 | -0.022 | 0.051 | 6.67E-01 | 29.3               | 1.57E-04         |
| rs9545155  | 13:80191873     | T/C   | 0.52                       | 0.016 | 0.003 | 3.04E-10 | 25                               | 6042      | 0.52 | 0.044  | 0.041 | 2.75E-01 | 0.0                | 1.29E-04         |
| rs9826984  | 3:131945722     | G/A   | 0.46                       | 0.014 | 0.003 | 3.87E-08 | 25                               | 6042      | 0.45 | 0.057  | 0.040 | 1.63E-01 | 14.8               | 9.80E-05         |

| SNP                          | Chr:Pos(GRCh37) | EA/BA | Smoking initiation (GSCAN) |       |       |          | Parkinson's disease (Courage-PD) |           |                 |                 |       |          |                    |                |
|------------------------------|-----------------|-------|----------------------------|-------|-------|----------|----------------------------------|-----------|-----------------|-----------------|-------|----------|--------------------|----------------|
|                              |                 |       | EAF                        | Beta  | SE    | P-value  | N studies                        | N samples | EAF             | Beta            | SE    | P-value  | I <sup>2</sup> (%) | R <sup>2</sup> |
| rs9922607                    | 16:17570220     | C/T   | 0.80                       | 0.022 | 0.003 | 3.42E-12 | 25                               | 6042      | 0.80            | 0.003           | 0.051 | 9.55E-01 | 20.3               | 1.57E-04       |
| rs9941217                    | 16:18050926     | C/G   | 0.65                       | 0.019 | 0.003 | 3.50E-12 | 25                               | 6042      | 0.66            | 0.036           | 0.062 | 5.64E-01 | 41.6               | 1.57E-04       |
| <b>HLA-DRB1*04: 0 allele</b> |                 |       |                            |       |       |          |                                  |           |                 |                 |       |          |                    |                |
| rs1008078                    | 1:91189731      | T/C   | 0.40                       | 0.023 | 0.003 | 1.63E-18 | 25                               | 14500     | 0.40            | -0.001          | 0.038 | 9.89E-01 |                    | 2.50E-04       |
| rs1022376                    | 2:22067213      | T/C   | 0.48                       | 0.015 | 0.003 | 1.66E-08 | 25                               | 14500     | 0.51            | 0.002           | 0.027 | 9.44E-01 |                    | 1.09E-04       |
| rs10233018                   | 7:117523709     | G/A   | 0.52                       | 0.025 | 0.003 | 4.77E-22 | 25                               | 14500     | 0.50            | 0.006           | 0.027 | 8.35E-01 |                    | 3.03E-04       |
| rs10279261                   | 7:133589846     | G/A   | 0.38                       | 0.019 | 0.003 | 6.05E-13 | 25                               | 14500     | 0.39            | 0.005           | 0.028 | 8.67E-01 |                    | 1.68E-04       |
| rs1030015*                   | 7:78139581      | T/G   | 0.52                       | 0.014 | 0.003 | 2.15E-08 | 25                               | 14500     | 0.52            | -0.015          | 0.027 | 5.92E-01 |                    | 1.02E-04       |
| rs10490159                   | 2:51341259      | T/C   | 0.39                       | 0.017 | 0.003 | 3.86E-11 | 25                               | 14500     | 0.39            | -0.033          | 0.027 | 2.16E-01 |                    | 1.42E-04       |
| rs1050847                    | 16:87443734     | C/T   | 0.44                       | 0.015 | 0.003 | 7.37E-09 | 25                               | 14500     | 0.48            | 0.017           | 0.027 | 5.42E-01 |                    | 1.08E-04       |
| rs10789369                   | 1:73824909      | A/G   | 0.38                       | 0.023 | 0.003 | 3.39E-19 | 25                               | 14500     | 0.43            | -0.010          | 0.036 | 7.71E-01 |                    | 2.60E-04       |
| rs10853981                   | 19:4965064      | A/G   | 0.33                       | 0.015 | 0.003 | 4.88E-08 | 25                               | 14500     | 0.31            | -0.037          | 0.029 | 1.92E-01 |                    | 9.67E-05       |
| rs10858334                   | 9:137989785     | G/C   | 0.14                       | 0.023 | 0.004 | 1.18E-09 | 25                               | 14500     | 0.14            | -0.037          | 0.040 | 3.43E-01 |                    | 1.26E-04       |
| rs10885480                   | 10:115378364    | T/C   | 0.72                       | 0.019 | 0.003 | 3.83E-11 | 25                               | 14500     | 0.73            | 0.000           | 0.030 | 9.94E-01 |                    | 1.42E-04       |
| rs10914684                   | 1:33795572      | G/A   | 0.68                       | 0.016 | 0.003 | 6.32E-09 | 25                               | 14500     | 0.67            | -0.014          | 0.028 | 6.31E-01 |                    | 1.09E-04       |
| rs10945141                   | 6:69470709      | A/G   | 0.26                       | 0.018 | 0.003 | 3.59E-10 | 25                               | 14500     | 0.26            | -0.014          | 0.030 | 6.42E-01 |                    | 1.28E-04       |
| rs10953957                   | 7:121954709     | A/G   | 0.39                       | 0.014 | 0.003 | 3.66E-08 | 25                               | 14500     | 0.39            | 0.010           | 0.027 | 7.10E-01 |                    | 9.84E-05       |
| rs10966092                   | 9:23831658      | T/C   | 0.73                       | 0.020 | 0.003 | 1.12E-12 | 25                               | 14500     | 0.73            | 0.024           | 0.030 | 4.20E-01 |                    | 1.64E-04       |
| rs11057005                   | 12:16748721     | A/G   | 0.56                       | 0.016 | 0.003 | 9.12E-10 | 25                               | 14500     | 0.58            | -0.033          | 0.028 | 2.44E-01 |                    | 1.22E-04       |
| rs1106363                    | 11:131966264    | T/C   | 0.34                       | 0.017 | 0.003 | 9.20E-11 | 25                               | 14500     | 0.36            | -0.012          | 0.027 | 6.65E-01 |                    | 1.36E-04       |
| rs11076962                   | 16:5811367      | C/T   | 0.28                       | 0.018 | 0.003 | 1.20E-10 | 25                               | 14500     | 0.26            | 0.026           | 0.030 | 3.80E-01 |                    | 1.35E-04       |
| rs1108130                    | 13:100648356    | A/T   | 0.21                       | 0.024 | 0.003 | 1.57E-14 | 25                               | 14500     | 0.20            | -0.038          | 0.034 | 2.56E-01 |                    | 1.92E-04       |
| rs1109480                    | 12:121083279    | G/A   | 0.62                       | 0.017 | 0.003 | 1.84E-10 | 25                               | 14500     | 0.62            | -0.027          | 0.027 | 3.18E-01 |                    | 1.32E-04       |
| rs11128203                   | 3:71064431      | A/T   | 0.53                       | 0.020 | 0.003 | 1.29E-15 | 12                               | 5562      | Excluded for MR |                 |       |          |                    |                |
| rs11162019                   | 1:87913176      | C/T   | 0.64                       | 0.015 | 0.003 | 5.06E-09 | 25                               | 14500     | 0.66            | -0.027          | 0.028 | 3.41E-01 |                    | 1.11E-04       |
| rs1116690                    | 4:143510148     | G/A   | 0.74                       | 0.016 | 0.003 | 2.16E-08 | 23                               | 14054     | 0.71            | 0.032           | 0.031 | 3.12E-01 |                    | 1.02E-04       |
| rs1126757*                   | 19:55879872     | T/C   | 0.47                       | 0.014 | 0.003 | 2.92E-08 | 25                               | 14485     | 0.47            | -0.012          | 0.026 | 6.53E-01 |                    | 1.00E-04       |
| rs112725451                  | 4:68017710      | T/C   | 0.17                       | 0.026 | 0.003 | 1.65E-14 | 25                               | 14500     | 0.17            | 0.022           | 0.048 | 6.49E-01 |                    | 1.91E-04       |
| rs113230003                  | 19:18460956     | G/A   | 0.74                       | 0.019 | 0.003 | 1.05E-10 | 25                               | 14500     | 0.76            | 0.045           | 0.032 | 1.58E-01 |                    | 1.35E-04       |
| rs1139897                    | 16:720986       | G/A   | 0.77                       | 0.024 | 0.003 | 1.77E-15 | 24                               | 14347     | 0.78            | 0.018           | 0.042 | 6.64E-01 |                    | 2.06E-04       |
| rs1150668                    | 6:28129789      | T/G   | 0.58                       | 0.019 | 0.003 | 8.54E-13 | 25                               | 14500     | 0.58            | -0.007          | 0.027 | 7.85E-01 |                    | 1.67E-04       |
| rs11594623                   | 10:103960351    | C/T   | 0.23                       | 0.027 | 0.003 | 7.45E-20 | 25                               | 14500     | 0.21            | -0.033          | 0.032 | 3.11E-01 |                    | 2.70E-04       |
| rs1160685                    | 4:94052854      | G/C   | 0.45                       | 0.015 | 0.003 | 2.31E-09 | 25                               | 14500     | 0.48            | Excluded for MR |       |          |                    |                |
| rs11611651                   | 12:133380790    | A/G   | 0.09                       | 0.027 | 0.005 | 2.05E-09 | 25                               | 14500     | 0.08            | -0.076          | 0.049 | 1.19E-01 |                    | 1.17E-04       |
| rs11642231                   | 16:89608702     | G/A   | 0.63                       | 0.016 | 0.003 | 3.44E-09 | 25                               | 14500     | 0.68            | 0.053           | 0.029 | 6.43E-02 |                    | 1.13E-04       |
| rs11713899                   | 3:2365026       | C/A   | 0.17                       | 0.019 | 0.003 | 3.15E-08 | 25                               | 14500     | 0.17            | -0.036          | 0.035 | 3.10E-01 |                    | 9.93E-05       |
| rs6050446†                   | 20:25195509     | G/C   | 0.95                       | 0.054 | 0.008 | 8.80E-13 | 21                               | 13282     | 0.98            | -0.118          | 0.094 | 2.09E-01 |                    | 2.81E-04       |
| rs117657830                  | 16:75766873     | A/G   | 0.96                       | 0.038 | 0.006 | 3.18E-09 | 25                               | 14500     | 0.96            | -0.036          | 0.068 | 6.01E-01 |                    | 1.14E-04       |

| SNP         | Chr:Pos(GRCh37) | EA/BA | Smoking initiation (GSCAN) |       |       |          | Parkinson's disease (Courage-PD) |           |                 |        |       |          |                    |                |
|-------------|-----------------|-------|----------------------------|-------|-------|----------|----------------------------------|-----------|-----------------|--------|-------|----------|--------------------|----------------|
|             |                 |       | EAF                        | Beta  | SE    | P-value  | N studies                        | N samples | EAF             | Beta   | SE    | P-value  | I <sup>2</sup> (%) | R <sup>2</sup> |
| rs11768481  | 7:96629103      | C/A   | 0.66                       | 0.019 | 0.003 | 5.23E-12 | 7                                | 4184      | Excluded for MR |        |       |          |                    |                |
| rs117734003 | 19:51129745     | C/G   | 0.07                       | 0.030 | 0.005 | 2.57E-09 | 17                               | 9934      | Excluded for MR |        |       |          |                    |                |
| rs11783093  | 8:27425349      | C/T   | 0.84                       | 0.047 | 0.003 | 2.07E-41 | 25                               | 14500     | 0.84            | -0.010 | 0.036 | 7.79E-01 |                    | 5.91E-04       |
| rs11791671  | 9:3398679       | T/C   | 0.07                       | 0.028 | 0.005 | 4.24E-08 | 25                               | 14500     | 0.06            | 0.020  | 0.071 | 7.81E-01 |                    | 9.74E-05       |
| rs118202    | 6:111658371     | G/T   | 0.19                       | 0.037 | 0.003 | 1.90E-29 | 25                               | 14500     | 0.19            | -0.081 | 0.049 | 9.92E-02 |                    | 4.12E-04       |
| rs1187820   | 3:173072584     | C/T   | 0.56                       | 0.014 | 0.003 | 2.69E-08 | 25                               | 14500     | 0.56            | 0.039  | 0.029 | 1.76E-01 |                    | 1.00E-04       |
| rs12022778  | 1:50603995      | C/A   | 0.20                       | 0.027 | 0.003 | 3.18E-17 | 25                               | 14500     | 0.19            | -0.011 | 0.034 | 7.51E-01 |                    | 2.32E-04       |
| rs12027999  | 1:154206358     | T/C   | 0.88                       | 0.024 | 0.004 | 5.33E-10 | 25                               | 14500     | 0.89            | -0.003 | 0.043 | 9.37E-01 |                    | 1.25E-04       |
| rs12130857  | 1:7791461       | G/A   | 0.68                       | 0.018 | 0.003 | 3.65E-11 | 25                               | 14500     | 0.69            | -0.041 | 0.029 | 1.51E-01 |                    | 1.42E-04       |
| rs12195240  | 6:98636905      | A/G   | 0.28                       | 0.025 | 0.003 | 1.08E-18 | 25                               | 14500     | 0.29            | 0.008  | 0.029 | 7.77E-01 |                    | 2.53E-04       |
| rs12244388  | 10:104640052    | A/G   | 0.35                       | 0.026 | 0.003 | 4.31E-22 | 25                               | 14500     | 0.37            | -0.056 | 0.027 | 4.02E-02 |                    | 3.03E-04       |
| rs12474587  | 2:162802993     | T/G   | 0.43                       | 0.024 | 0.003 | 4.83E-21 | 25                               | 14500     | 0.40            | 0.040  | 0.027 | 1.38E-01 |                    | 2.88E-04       |
| rs12517438  | 5:30842054      | G/T   | 0.54                       | 0.015 | 0.003 | 1.89E-09 | 25                               | 14500     | 0.52            | 0.010  | 0.027 | 7.10E-01 |                    | 1.17E-04       |
| rs12633090  | 3:83241365      | G/C   | 0.82                       | 0.023 | 0.003 | 3.16E-12 | 25                               | 14500     | 0.81            | 0.063  | 0.045 | 1.68E-01 |                    | 1.58E-04       |
| rs12714017  | 2:80999398      | C/T   | 0.51                       | 0.015 | 0.003 | 3.65E-09 | 25                               | 14500     | 0.52            | -0.008 | 0.027 | 7.50E-01 |                    | 1.18E-04       |
| rs12739243  | 1:210302043     | T/C   | 0.78                       | 0.021 | 0.003 | 4.45E-12 | 25                               | 14500     | 0.78            | 0.026  | 0.040 | 5.14E-01 |                    | 1.56E-04       |
| rs12878369  | 14:28346502     | A/C   | 0.41                       | 0.017 | 0.003 | 1.60E-11 | 25                               | 14500     | 0.42            | -0.055 | 0.027 | 3.90E-02 |                    | 1.48E-04       |
| rs12918191  | 16:50945156     | A/G   | 0.76                       | 0.020 | 0.003 | 3.14E-11 | 25                               | 14500     | 0.76            | 0.007  | 0.031 | 8.30E-01 |                    | 1.43E-04       |
| rs1291821   | 10:11133823     | G/A   | 0.53                       | 0.014 | 0.003 | 1.39E-08 | 25                               | 14500     | 0.54            | -0.053 | 0.027 | 4.80E-02 |                    | 1.05E-04       |
| rs13007361  | 2:166250244     | A/G   | 0.21                       | 0.018 | 0.003 | 2.29E-08 | 25                               | 14500     | 0.21            | 0.035  | 0.032 | 2.80E-01 |                    | 1.01E-04       |
| rs13110073  | 4:147797913     | T/C   | 0.60                       | 0.025 | 0.003 | 3.24E-21 | 25                               | 14500     | 0.62            | -0.054 | 0.027 | 4.30E-02 |                    | 2.90E-04       |
| rs13261666  | 8:59814666      | G/T   | 0.48                       | 0.020 | 0.003 | 4.36E-15 | 25                               | 14500     | 0.48            | -0.012 | 0.027 | 6.43E-01 |                    | 2.00E-04       |
| rs13392222  | 2:100672408     | A/C   | 0.86                       | 0.023 | 0.004 | 1.93E-10 | 25                               | 14500     | 0.87            | 0.041  | 0.040 | 3.06E-01 |                    | 1.31E-04       |
| rs13437771  | 7:99071478      | A/G   | 0.84                       | 0.027 | 0.004 | 1.39E-14 | 25                               | 14500     | 0.85            | -0.032 | 0.037 | 3.88E-01 |                    | 1.93E-04       |
| rs1373178   | 18:49967811     | T/G   | 0.41                       | 0.020 | 0.003 | 4.16E-15 | 25                               | 14500     | 0.42            | -0.033 | 0.027 | 2.26E-01 |                    | 2.00E-04       |
| rs1381287   | 14:98597552     | T/C   | 0.47                       | 0.018 | 0.003 | 1.81E-12 | 25                               | 14500     | 0.49            | 0.012  | 0.027 | 6.41E-01 |                    | 1.62E-04       |
| rs1381775   | 11:42442826     | T/C   | 0.29                       | 0.016 | 0.003 | 2.79E-08 | 25                               | 14500     | 0.29            | -0.040 | 0.029 | 1.79E-01 |                    | 1.00E-04       |
| rs1385108   | 5:154839646     | T/C   | 0.24                       | 0.019 | 0.003 | 3.84E-10 | 25                               | 14500     | 0.23            | -0.026 | 0.031 | 4.17E-01 |                    | 1.27E-04       |
| rs13906     | 12:49952394     | C/T   | 0.89                       | 0.025 | 0.004 | 1.98E-09 | 25                               | 14500     | 0.89            | -0.041 | 0.043 | 3.34E-01 |                    | 1.17E-04       |
| rs1435672   | 15:36399479     | C/T   | 0.56                       | 0.014 | 0.003 | 3.82E-08 | 25                               | 14500     | 0.54            | 0.007  | 0.027 | 8.01E-01 |                    | 9.80E-05       |
| rs1445649   | 2:155682556     | C/T   | 0.54                       | 0.021 | 0.003 | 8.48E-16 | 25                               | 14500     | 0.54            | -0.022 | 0.026 | 4.10E-01 |                    | 2.10E-04       |
| rs1449012   | 3:159048333     | C/T   | 0.54                       | 0.015 | 0.003 | 1.77E-09 | 25                               | 14500     | 0.53            | 0.006  | 0.027 | 8.35E-01 |                    | 1.18E-04       |
| rs147052174 | 1:179783167     | T/G   | 0.02                       | 0.062 | 0.010 | 2.30E-10 | 10                               | 7049      | Excluded for MR |        |       |          |                    |                |
| rs1514176   | 1:74991596      | G/A   | 0.42                       | 0.019 | 0.003 | 7.67E-14 | 25                               | 14500     | 0.43            | -0.008 | 0.027 | 7.74E-01 |                    | 1.81E-04       |
| rs1549979   | 3:85460131      | C/T   | 0.38                       | 0.025 | 0.003 | 8.80E-21 | 25                               | 14500     | 0.38            | 0.044  | 0.027 | 1.07E-01 |                    | 2.85E-04       |
| rs160631    | 6:52895230      | T/G   | 0.27                       | 0.017 | 0.003 | 1.87E-09 | 25                               | 14500     | 0.29            | 0.014  | 0.030 | 6.48E-01 |                    | 1.17E-04       |
| rs16826827  | 2:147825689     | T/C   | 0.88                       | 0.022 | 0.004 | 9.17E-09 | 25                               | 14500     | 0.88            | 0.032  | 0.041 | 4.39E-01 |                    | 1.07E-04       |
| rs1713676*  | 11:113660576    | A/G   | 0.48                       | 0.017 | 0.003 | 5.38E-11 | 25                               | 14500     | 0.47            | -0.010 | 0.026 | 7.12E-01 |                    | 1.40E-04       |
| rs1714521   | 3:158284861     | A/C   | 0.59                       | 0.016 | 0.003 | 3.07E-10 | 25                               | 14500     | 0.61            | 0.013  | 0.037 | 7.23E-01 |                    | 1.29E-04       |

| SNP        | Chr:Pos(GRCh37) | EA/BA | Smoking initiation (GSCAN) |       |       |          | Parkinson's disease (Courage-PD) |           |                 |                 |       |          |                    |                |
|------------|-----------------|-------|----------------------------|-------|-------|----------|----------------------------------|-----------|-----------------|-----------------|-------|----------|--------------------|----------------|
|            |                 |       | EAF                        | Beta  | SE    | P-value  | N studies                        | N samples | EAF             | Beta            | SE    | P-value  | I <sup>2</sup> (%) | R <sup>2</sup> |
| rs17197663 | 13:38172867     | G/A   | 0.88                       | 0.022 | 0.004 | 2.06E-08 | 25                               | 14500     | 0.87            | 0.074           | 0.039 | 5.82E-02 |                    | 1.02E-04       |
| rs17229285 | 2:199523122     | C/T   | 0.50                       | 0.015 | 0.003 | 1.27E-09 | 25                               | 14500     | 0.52            | 0.036           | 0.040 | 3.70E-01 |                    | 1.20E-04       |
| rs1733760  | 10:56698174     | C/T   | 0.51                       | 0.015 | 0.003 | 6.70E-09 | 25                               | 14500     | 0.49            | 0.044           | 0.027 | 1.04E-01 |                    | 1.09E-04       |
| rs1737329  | 6:163807748     | G/C   | 0.74                       | 0.017 | 0.003 | 5.08E-09 | 25                               | 14500     | 0.72            | 0.031           | 0.038 | 4.28E-01 |                    | 1.11E-04       |
| rs17554906 | 6:92226609      | C/G   | 0.44                       | 0.014 | 0.003 | 3.14E-08 | 25                               | 14500     | 0.42            | Excluded for MR |       |          |                    |                |
| rs1772572  | 13:81191176     | C/A   | 0.68                       | 0.017 | 0.003 | 5.62E-10 | 25                               | 14500     | 0.68            | -0.040          | 0.028 | 1.46E-01 |                    | 1.25E-04       |
| rs1811739  | 14:77529375     | A/G   | 0.25                       | 0.018 | 0.003 | 5.97E-10 | 25                               | 14500     | 0.25            | 0.004           | 0.031 | 8.92E-01 |                    | 1.25E-04       |
| rs1889571  | 1:32195819      | G/T   | 0.13                       | 0.022 | 0.004 | 4.19E-09 | 25                               | 14500     | 0.12            | 0.038           | 0.041 | 3.47E-01 |                    | 1.12E-04       |
| rs1901477  | 2:104126983     | G/A   | 0.51                       | 0.030 | 0.003 | 2.07E-31 | 25                               | 14500     | 0.52            | 0.012           | 0.039 | 7.66E-01 |                    | 4.63E-04       |
| rs2010921  | 11:132098205    | A/G   | 0.31                       | 0.017 | 0.003 | 2.47E-10 | 25                               | 14500     | 0.31            | -0.011          | 0.029 | 7.12E-01 |                    | 1.30E-04       |
| rs2063976  | 8:91096366      | C/T   | 0.34                       | 0.020 | 0.003 | 7.45E-14 | 25                               | 14500     | 0.34            | 0.006           | 0.028 | 8.45E-01 |                    | 1.81E-04       |
| rs2155646  | 11:112912811    | C/T   | 0.40                       | 0.038 | 0.003 | 9.44E-48 | 25                               | 14500     | 0.39            | -0.007          | 0.027 | 8.03E-01 |                    | 6.85E-04       |
| rs2173019  | 5:167614971     | A/T   | 0.18                       | 0.028 | 0.003 | 2.98E-17 | 25                               | 14500     | 0.17            | 0.020           | 0.035 | 5.61E-01 |                    | 2.32E-04       |
| rs221988   | 3:64234307      | A/C   | 0.62                       | 0.015 | 0.003 | 1.43E-08 | 25                               | 14500     | 0.62            | 0.012           | 0.028 | 6.66E-01 |                    | 1.05E-04       |
| rs2279829  | 3:147106319     | C/T   | 0.78                       | 0.017 | 0.003 | 2.05E-08 | 25                               | 14500     | 0.80            | 0.009           | 0.033 | 7.91E-01 |                    | 1.02E-04       |
| rs2289791  | 15:67476952     | G/T   | 0.75                       | 0.018 | 0.003 | 2.01E-09 | 12                               | 5562      | Excluded for MR |                 |       |          |                    |                |
| rs2319545  | 3:147719648     | A/C   | 0.15                       | 0.023 | 0.004 | 8.30E-11 | 25                               | 14500     | 0.13            | -0.029          | 0.040 | 4.73E-01 |                    | 1.37E-04       |
| rs2378662  | 9:86707289      | A/G   | 0.54                       | 0.015 | 0.003 | 2.67E-09 | 25                               | 14500     | 0.53            | 0.017           | 0.027 | 5.43E-01 |                    | 1.15E-04       |
| rs2526390  | 3:50192760      | T/C   | 0.33                       | 0.020 | 0.003 | 3.62E-14 | 25                               | 14500     | 0.33            | 0.006           | 0.028 | 8.22E-01 |                    | 1.86E-04       |
| rs2587507* | 17:77790135     | T/C   | 0.50                       | 0.015 | 0.003 | 8.69E-09 | 25                               | 14496     | 0.51            | -0.013          | 0.026 | 6.07E-01 |                    | 1.07E-04       |
| rs2710634  | 2:32808804      | T/C   | 0.48                       | 0.018 | 0.003 | 3.36E-12 | 25                               | 14500     | 0.50            | -0.022          | 0.027 | 4.17E-01 |                    | 1.57E-04       |
| rs2796793  | 10:36634124     | A/G   | 0.45                       | 0.014 | 0.003 | 1.55E-08 | 24                               | 13673     | 0.43            | 0.063           | 0.039 | 1.06E-01 |                    | 1.04E-04       |
| rs281296   | 15:47685010     | A/G   | 0.36                       | 0.025 | 0.003 | 1.59E-20 | 25                               | 14500     | 0.37            | -0.023          | 0.028 | 4.12E-01 |                    | 2.80E-04       |
| rs28441558 | 17:7803118      | T/C   | 0.94                       | 0.036 | 0.006 | 1.24E-10 | 17                               | 9934      | Excluded for MR |                 |       |          |                    |                |
| rs2901785  | 1:174104743     | G/A   | 0.55                       | 0.017 | 0.003 | 1.47E-11 | 25                               | 14500     | 0.54            | -0.003          | 0.027 | 8.97E-01 |                    | 1.48E-04       |
| rs290601   | 8:115374642     | T/C   | 0.27                       | 0.016 | 0.003 | 1.14E-08 | 25                               | 14500     | 0.27            | -0.005          | 0.030 | 8.63E-01 |                    | 1.06E-04       |
| rs2925128  | 14:98362355     | T/C   | 0.39                       | 0.017 | 0.003 | 3.67E-10 | 25                               | 14500     | 0.39            | -0.055          | 0.027 | 4.26E-02 |                    | 1.34E-04       |
| rs2939756  | 11:41436297     | G/A   | 0.52                       | 0.016 | 0.003 | 7.45E-10 | 25                               | 14500     | 0.55            | -0.012          | 0.034 | 7.28E-01 |                    | 1.23E-04       |
| rs3218116  | 6:41901763      | C/T   | 0.74                       | 0.020 | 0.003 | 1.05E-11 | 25                               | 14500     | 0.76            | 0.036           | 0.031 | 2.52E-01 |                    | 1.50E-04       |
| rs329124   | 5:133865452     | A/G   | 0.57                       | 0.016 | 0.003 | 1.96E-10 | 25                               | 14500     | 0.57            | -0.024          | 0.027 | 3.60E-01 |                    | 1.31E-04       |
| rs34342129 | 18:5872472      | T/C   | 0.49                       | 0.014 | 0.003 | 2.13E-08 | 25                               | 14500     | 0.50            | -0.022          | 0.027 | 4.14E-01 |                    | 1.02E-04       |
| rs34399632 | 2:137571174     | G/A   | 0.23                       | 0.019 | 0.003 | 1.46E-10 | 25                               | 14500     | 0.18            | -0.062          | 0.035 | 7.43E-02 |                    | 1.33E-04       |
| rs34553878 | 9:134334588     | G/A   | 0.11                       | 0.025 | 0.004 | 1.17E-09 | 17                               | 10303     | Excluded for MR |                 |       |          |                    |                |
| rs35375873 | 5:43190647      | G/C   | 0.89                       | 0.027 | 0.004 | 3.29E-11 | 17                               | 9934      | Excluded for MR |                 |       |          |                    |                |
| rs35656245 | 1:190957480     | A/G   | 0.28                       | 0.016 | 0.003 | 2.23E-08 | 25                               | 14500     | 0.29            | 0.006           | 0.029 | 8.25E-01 |                    | 1.02E-04       |
| rs359247   | 2:60477052      | T/A   | 0.64                       | 0.022 | 0.003 | 9.89E-17 | 25                               | 14500     | 0.61            | -0.011          | 0.028 | 6.89E-01 |                    | 2.24E-04       |
| rs3764351  | 17:37824339     | G/A   | 0.34                       | 0.015 | 0.003 | 3.89E-08 | 25                               | 14500     | 0.37            | -0.020          | 0.040 | 6.21E-01 |                    | 9.80E-05       |
| rs3810496  | 20:62406886     | C/T   | 0.62                       | 0.016 | 0.003 | 1.54E-09 | 24                               | 14354     | 0.62            | -0.023          | 0.029 | 4.40E-01 |                    | 1.19E-04       |
| rs3811038  | 2:113240183     | C/T   | 0.28                       | 0.019 | 0.003 | 1.58E-11 | 25                               | 14500     | 0.29            | -0.013          | 0.030 | 6.69E-01 |                    | 1.47E-04       |



| SNP        | Chr:Pos(GRCh37) | EA/BA | Smoking initiation (GSCAN) |       |       |          | Parkinson's disease (Courage-PD) |           |                 |                 |       |          |                    |                |
|------------|-----------------|-------|----------------------------|-------|-------|----------|----------------------------------|-----------|-----------------|-----------------|-------|----------|--------------------|----------------|
|            |                 |       | EAF                        | Beta  | SE    | P-value  | N studies                        | N samples | EAF             | Beta            | SE    | P-value  | I <sup>2</sup> (%) | R <sup>2</sup> |
| rs3820277  | 1:18436657      | G/T   | 0.47                       | 0.019 | 0.003 | 1.57E-13 | 25                               | 14500     | 0.50            | -0.044          | 0.026 | 9.26E-02 |                    | 1.77E-04       |
| rs3847244  | 9:3025368       | T/C   | 0.47                       | 0.019 | 0.003 | 2.60E-13 | 25                               | 14500     | 0.47            | -0.030          | 0.027 | 2.67E-01 |                    | 1.74E-04       |
| rs3850736  | 8:64912021      | G/C   | 0.47                       | 0.019 | 0.003 | 6.43E-14 | 25                               | 14500     | 0.46            | Excluded for MR |       |          |                    |                |
| rs3934797  | 4:112467612     | G/A   | 0.82                       | 0.021 | 0.003 | 1.12E-10 | 25                               | 14500     | 0.83            | 0.009           | 0.036 | 8.04E-01 |                    | 1.35E-04       |
| rs4044321  | 5:166989513     | A/G   | 0.36                       | 0.023 | 0.003 | 1.75E-17 | 25                               | 14500     | 0.37            | -0.012          | 0.028 | 6.60E-01 |                    | 2.35E-04       |
| rs4140932  | 4:15458598      | T/A   | 0.57                       | 0.014 | 0.003 | 4.89E-08 | 25                               | 14500     | 0.57            | Excluded for MR |       |          |                    |                |
| rs42417    | 5:94198290      | T/C   | 0.69                       | 0.017 | 0.003 | 8.27E-10 | 25                               | 14500     | 0.70            | -0.031          | 0.041 | 4.54E-01 |                    | 1.22E-04       |
| rs4264267  | 13:38359676     | T/C   | 0.53                       | 0.015 | 0.003 | 6.82E-09 | 25                               | 14500     | 0.52            | -0.009          | 0.027 | 7.37E-01 |                    | 1.09E-04       |
| rs4310804  | 15:96858409     | C/G   | 0.75                       | 0.018 | 0.003 | 7.55E-10 | 22                               | 11724     | 0.77            | 0.014           | 0.037 | 7.04E-01 |                    | 1.23E-04       |
| rs4326350  | 8:10763655      | C/G   | 0.51                       | 0.018 | 0.003 | 5.16E-12 | 25                               | 14500     | 0.53            | Excluded for MR |       |          |                    |                |
| rs4476253  | 18:25253297     | G/A   | 0.76                       | 0.018 | 0.003 | 5.78E-10 | 25                               | 14500     | 0.76            | -0.001          | 0.031 | 9.67E-01 |                    | 1.25E-04       |
| rs45444697 | 1:155034632     | G/C   | 0.21                       | 0.020 | 0.003 | 2.72E-10 | 25                               | 14500     | 0.20            | -0.014          | 0.034 | 6.91E-01 |                    | 1.30E-04       |
| rs4674993  | 2:226332033     | A/G   | 0.80                       | 0.024 | 0.003 | 4.85E-14 | 25                               | 14500     | 0.80            | 0.007           | 0.034 | 8.43E-01 |                    | 1.84E-04       |
| rs4727189  | 7:88442568      | C/T   | 0.34                       | 0.015 | 0.003 | 3.00E-08 | 25                               | 14500     | 0.36            | 0.040           | 0.027 | 1.38E-01 |                    | 9.97E-05       |
| rs4752018  | 10:118678712    | A/C   | 0.23                       | 0.019 | 0.003 | 4.42E-10 | 25                               | 14500     | 0.23            | 0.035           | 0.031 | 2.66E-01 |                    | 1.26E-04       |
| rs4759229  | 12:56474480     | G/A   | 0.66                       | 0.016 | 0.003 | 6.53E-09 | 24                               | 14354     | 0.65            | 0.018           | 0.029 | 5.46E-01 |                    | 1.09E-04       |
| rs4790874  | 17:1995177      | T/C   | 0.53                       | 0.017 | 0.003 | 8.43E-12 | 25                               | 14500     | 0.54            | -0.046          | 0.027 | 9.20E-02 |                    | 1.52E-04       |
| rs4818005  | 21:40588819     | G/A   | 0.42                       | 0.020 | 0.003 | 1.09E-14 | 25                               | 14500     | 0.43            | -0.044          | 0.027 | 9.97E-02 |                    | 2.03E-04       |
| rs4822102  | 22:42698430     | C/T   | 0.38                       | 0.017 | 0.003 | 2.78E-10 | 25                               | 14500     | 0.38            | 0.009           | 0.035 | 8.07E-01 |                    | 1.29E-04       |
| rs4837631  | 9:122061948     | C/T   | 0.55                       | 0.015 | 0.003 | 2.03E-09 | 25                               | 14500     | 0.58            | 0.008           | 0.027 | 7.65E-01 |                    | 1.17E-04       |
| rs4877285  | 9:81354129      | G/A   | 0.33                       | 0.018 | 0.003 | 2.10E-11 | 25                               | 14500     | 0.36            | -0.052          | 0.029 | 7.03E-02 |                    | 1.46E-04       |
| rs4912332  | 1:58815243      | T/C   | 0.49                       | 0.014 | 0.003 | 2.94E-08 | 25                               | 14500     | 0.47            | -0.008          | 0.026 | 7.71E-01 |                    | 9.97E-05       |
| rs540860   | 11:121530888    | G/A   | 0.54                       | 0.018 | 0.003 | 5.75E-12 | 25                               | 14500     | 0.52            | 0.026           | 0.026 | 3.16E-01 |                    | 1.54E-04       |
| rs55786907 | 13:59871584     | G/A   | 0.16                       | 0.019 | 0.003 | 1.84E-08 | 25                               | 14500     | 0.17            | -0.030          | 0.035 | 3.99E-01 |                    | 1.03E-04       |
| rs58400863 | 4:31184484      | G/A   | 0.65                       | 0.020 | 0.003 | 4.89E-14 | 25                               | 14500     | 0.64            | 0.008           | 0.028 | 7.76E-01 |                    | 1.84E-04       |
| rs59537158 | 4:28246049      | T/C   | 0.21                       | 0.022 | 0.003 | 4.62E-13 | 25                               | 14500     | 0.20            | 0.009           | 0.034 | 8.00E-01 |                    | 1.70E-04       |
| rs6073075  | 20:42015801     | T/A   | 0.18                       | 0.019 | 0.003 | 2.44E-08 | 25                               | 14500     | 0.19            | -0.003          | 0.035 | 9.40E-01 |                    | 1.01E-04       |
| rs61533748 | 2:22582968      | C/T   | 0.38                       | 0.017 | 0.003 | 2.82E-11 | 25                               | 14500     | 0.37            | 0.023           | 0.028 | 4.07E-01 |                    | 1.44E-04       |
| rs61886926 | 11:64133552     | C/T   | 0.62                       | 0.018 | 0.003 | 7.30E-12 | 25                               | 14500     | 0.64            | -0.017          | 0.035 | 6.30E-01 |                    | 1.52E-04       |
| rs61959481 | 13:55834929     | G/A   | 0.79                       | 0.020 | 0.003 | 7.95E-11 | 25                               | 14500     | 0.79            | -0.025          | 0.032 | 4.39E-01 |                    | 1.37E-04       |
| rs62007780 | 15:78025464     | G/T   | 0.58                       | 0.016 | 0.003 | 7.48E-10 | 25                               | 14500     | 0.59            | 0.013           | 0.027 | 6.38E-01 |                    | 1.23E-04       |
| rs62193862 | 2:202843875     | A/G   | 0.10                       | 0.024 | 0.004 | 1.99E-08 | 14                               | 8357      | Excluded for MR |                 |       |          |                    |                |
| rs62246017 | 3:71483084      | G/A   | 0.68                       | 0.016 | 0.003 | 3.03E-09 | 25                               | 14500     | 0.68            | -0.056          | 0.030 | 6.08E-02 |                    | 1.14E-04       |
| rs62340589 | 4:176875795     | C/G   | 0.20                       | 0.017 | 0.003 | 4.31E-08 | 25                               | 14500     | 0.20            | -0.051          | 0.034 | 1.31E-01 |                    | 9.74E-05       |
| rs6265*    | 11:27679916     | C/T   | 0.81                       | 0.029 | 0.003 | 2.81E-19 | 25                               | 14500     | 0.80            | -0.001          | 0.032 | 9.85E-01 |                    | 2.62E-04       |
| rs6437769  | 3:107997514     | T/C   | 0.58                       | 0.014 | 0.003 | 3.74E-08 | 25                               | 14500     | 0.59            | 0.002           | 0.027 | 9.43E-01 |                    | 9.84E-05       |
| rs6438436  | 3:117822149     | T/C   | 0.82                       | 0.025 | 0.003 | 5.33E-14 | 25                               | 14500     | 0.82            | 0.045           | 0.035 | 2.00E-01 |                    | 1.84E-04       |
| rs644740   | 11:65561468     | C/T   | 0.54                       | 0.014 | 0.003 | 3.67E-08 | 25                               | 14500     | 0.54            | 0.004           | 0.026 | 8.71E-01 |                    | 9.84E-05       |
| rs6452785  | 5:87685500      | C/T   | 0.53                       | 0.027 | 0.003 | 4.69E-26 | 25                               | 14500     | 0.51            | -0.019          | 0.026 | 4.74E-01 |                    | 3.60E-04       |

| SNP        | Chr:Pos(GRCh37) | EA/BA | Smoking initiation (GSCAN) |       |       |          | Parkinson's disease (Courage-PD) |           |      |        |       |          |                    |                |
|------------|-----------------|-------|----------------------------|-------|-------|----------|----------------------------------|-----------|------|--------|-------|----------|--------------------|----------------|
|            |                 |       | EAF                        | Beta  | SE    | P-value  | N studies                        | N samples | EAF  | Beta   | SE    | P-value  | I <sup>2</sup> (%) | R <sup>2</sup> |
| rs6497840  | 16:25351633     | A/G   | 0.71                       | 0.023 | 0.003 | 2.01E-15 | 25                               | 14500     | 0.69 | -0.024 | 0.029 | 4.14E-01 |                    | 2.15E-04       |
| rs6568832  | 6:97702876      | A/G   | 0.75                       | 0.019 | 0.003 | 1.74E-10 | 25                               | 14500     | 0.74 | 0.020  | 0.031 | 5.23E-01 |                    | 1.32E-04       |
| rs67050670 | 18:39297254     | A/G   | 0.77                       | 0.020 | 0.003 | 2.34E-11 | 25                               | 14500     | 0.75 | 0.038  | 0.031 | 2.15E-01 |                    | 1.45E-04       |
| rs6731872  | 2:624205        | G/T   | 0.83                       | 0.032 | 0.003 | 5.35E-21 | 25                               | 14500     | 0.80 | 0.006  | 0.034 | 8.70E-01 |                    | 2.87E-04       |
| rs6750529  | 2:182027603     | T/C   | 0.74                       | 0.020 | 0.003 | 9.26E-12 | 25                               | 14500     | 0.75 | -0.032 | 0.030 | 2.94E-01 |                    | 1.51E-04       |
| rs6756212  | 2:146140132     | C/T   | 0.47                       | 0.034 | 0.003 | 3.49E-40 | 25                               | 14500     | 0.46 | -0.036 | 0.026 | 1.77E-01 |                    | 5.71E-04       |
| rs67777803 | 17:27323322     | G/T   | 0.83                       | 0.025 | 0.003 | 3.18E-13 | 25                               | 14500     | 0.84 | -0.015 | 0.036 | 6.67E-01 |                    | 1.72E-04       |
| rs6874731  | 5:80263865      | G/T   | 0.48                       | 0.015 | 0.003 | 1.83E-09 | 25                               | 14500     | 0.47 | -0.009 | 0.043 | 8.29E-01 |                    | 1.17E-04       |
| rs6890961  | 5:166778503     | C/T   | 0.38                       | 0.019 | 0.003 | 2.13E-13 | 25                               | 14500     | 0.40 | -0.045 | 0.028 | 1.14E-01 |                    | 1.75E-04       |
| rs6936160  | 6:100347745     | T/C   | 0.70                       | 0.020 | 0.003 | 4.20E-13 | 25                               | 14500     | 0.69 | 0.000  | 0.029 | 9.91E-01 |                    | 1.70E-04       |
| rs6948707  | 7:1870794       | G/T   | 0.42                       | 0.024 | 0.003 | 4.24E-21 | 25                               | 14500     | 0.41 | 0.016  | 0.036 | 6.65E-01 |                    | 2.89E-04       |
| rs6986430  | 8:93048104      | T/C   | 0.78                       | 0.024 | 0.003 | 1.99E-15 | 25                               | 14500     | 0.77 | 0.034  | 0.031 | 2.68E-01 |                    | 2.05E-04       |
| rs7024924  | 9:8282399       | C/T   | 0.17                       | 0.019 | 0.003 | 1.90E-08 | 25                               | 14500     | 0.17 | 0.005  | 0.035 | 8.81E-01 |                    | 1.03E-04       |
| rs7072776  | 10:22032942     | A/G   | 0.29                       | 0.022 | 0.003 | 5.66E-15 | 24                               | 13673     | 0.33 | 0.021  | 0.030 | 4.94E-01 |                    | 1.98E-04       |
| rs7134009  | 12:75263193     | T/C   | 0.71                       | 0.016 | 0.003 | 4.30E-08 | 25                               | 14500     | 0.70 | -0.018 | 0.029 | 5.36E-01 |                    | 1.02E-04       |
| rs71367544 | 18:77574374     | T/C   | 0.20                       | 0.021 | 0.003 | 8.54E-11 | 25                               | 14500     | 0.17 | 0.027  | 0.035 | 4.45E-01 |                    | 1.37E-04       |
| rs71592686 | 5:60121271      | C/T   | 0.27                       | 0.021 | 0.003 | 3.85E-13 | 25                               | 14500     | 0.27 | 0.021  | 0.030 | 4.76E-01 |                    | 1.71E-04       |
| rs71602617 | 4:136406155     | C/T   | 0.78                       | 0.018 | 0.003 | 2.10E-08 | 25                               | 14500     | 0.79 | 0.031  | 0.033 | 3.48E-01 |                    | 1.07E-04       |
| rs72780746 | 5:103929588     | T/C   | 0.83                       | 0.026 | 0.003 | 2.05E-14 | 25                               | 14500     | 0.81 | -0.019 | 0.034 | 5.70E-01 |                    | 1.90E-04       |
| rs72836318 | 17:44121579     | T/C   | 0.75                       | 0.017 | 0.003 | 7.00E-09 | 25                               | 14500     | 0.75 | -0.087 | 0.031 | 5.08E-03 |                    | 1.09E-04       |
| rs72938304 | 18:53661743     | G/A   | 0.89                       | 0.027 | 0.004 | 1.36E-11 | 25                               | 14500     | 0.88 | 0.022  | 0.042 | 6.02E-01 |                    | 1.48E-04       |
| rs748832   | 3:16851202      | G/A   | 0.37                       | 0.017 | 0.003 | 6.60E-11 | 25                               | 14500     | 0.35 | 0.063  | 0.027 | 2.20E-02 |                    | 1.38E-04       |
| rs75919030 | 17:50193197     | T/C   | 0.73                       | 0.021 | 0.003 | 3.35E-13 | 25                               | 14500     | 0.74 | -0.008 | 0.030 | 8.01E-01 |                    | 1.72E-04       |
| rs7598402  | 2:50735943      | C/G   | 0.51                       | 0.015 | 0.003 | 7.38E-09 | 25                               | 14500     | 0.50 |        |       |          | Excluded for MR    |                |
| rs7631379  | 3:181409057     | C/T   | 0.21                       | 0.021 | 0.003 | 3.94E-11 | 25                               | 14500     | 0.19 | -0.023 | 0.052 | 6.64E-01 |                    | 1.42E-04       |
| rs76608582 | 19:4474725      | C/A   | 0.95                       | 0.035 | 0.006 | 4.88E-09 |                                  |           |      |        |       |          | NA in Courage-PD   |                |
| rs7696257  | 4:137474783     | A/G   | 0.37                       | 0.015 | 0.003 | 6.78E-09 | 25                               | 14500     | 0.36 | -0.011 | 0.028 | 6.92E-01 |                    | 1.09E-04       |
| rs77215829 | 12:112618346    | A/C   | 0.87                       | 0.024 | 0.004 | 2.02E-10 | 19                               | 10133     | 0.87 | 0.043  | 0.051 | 4.00E-01 |                    | 1.32E-04       |
| rs77283305 | 7:132593831     | G/A   | 0.69                       | 0.015 | 0.003 | 3.91E-08 | 25                               | 14500     | 0.70 | -0.030 | 0.037 | 4.22E-01 |                    | 9.80E-05       |
| rs7743165  | 6:67521222      | G/T   | 0.50                       | 0.019 | 0.003 | 4.15E-14 | 25                               | 14500     | 0.47 | -0.049 | 0.027 | 6.62E-02 |                    | 1.85E-04       |
| rs7809303  | 7:69484366      | G/A   | 0.68                       | 0.021 | 0.003 | 3.48E-15 | 25                               | 14500     | 0.70 | -0.030 | 0.028 | 2.92E-01 |                    | 2.01E-04       |
| rs7836565  | 8:52569449      | C/T   | 0.28                       | 0.016 | 0.003 | 4.36E-08 | 25                               | 14500     | 0.29 | 0.065  | 0.030 | 2.92E-02 |                    | 9.74E-05       |
| rs7920501  | 10:10043159     | T/A   | 0.54                       | 0.016 | 0.003 | 1.25E-09 | 25                               | 14500     | 0.53 |        |       |          | Excluded for MR    |                |
| rs7921378  | 10:63674885     | G/C   | 0.52                       | 0.023 | 0.003 | 6.10E-20 | 25                               | 14500     | 0.53 |        |       |          | Excluded for MR    |                |
| rs7929518  | 11:85980958     | G/A   | 0.77                       | 0.019 | 0.003 | 2.55E-10 | 25                               | 14500     | 0.77 | -0.078 | 0.041 | 5.57E-02 |                    | 1.30E-04       |
| rs7943721  | 11:73309393     | G/A   | 0.17                       | 0.021 | 0.003 | 3.58E-10 |                                  |           |      |        |       |          | NA in Courage-PD   |                |
| rs7969559  | 12:69655167     | A/G   | 0.29                       | 0.017 | 0.003 | 1.53E-09 | 25                               | 14500     | 0.33 | -0.007 | 0.037 | 8.48E-01 |                    | 1.18E-04       |
| rs8005334  | 14:79563654     | G/T   | 0.36                       | 0.017 | 0.003 | 3.44E-10 | 25                               | 14500     | 0.35 | -0.016 | 0.028 | 5.71E-01 |                    | 1.28E-04       |
| rs80054503 | 1:72900406      | T/C   | 0.88                       | 0.024 | 0.004 | 3.10E-09 |                                  |           |      |        |       |          | NA in Courage-PD   |                |

| SNP                                | Chr:Pos(GRCh37) | EA/BA | Smoking initiation (GSCAN) |       |       |          | Parkinson's disease (Courage-PD) |           |                 |                 |       |          |                    |                |
|------------------------------------|-----------------|-------|----------------------------|-------|-------|----------|----------------------------------|-----------|-----------------|-----------------|-------|----------|--------------------|----------------|
|                                    |                 |       | EAF                        | Beta  | SE    | P-value  | N studies                        | N samples | EAF             | Beta            | SE    | P-value  | I <sup>2</sup> (%) | R <sup>2</sup> |
| rs8096225                          | 18:36921851     | C/A   | 0.70                       | 0.016 | 0.003 | 2.63E-08 | 25                               | 14500     | 0.70            | 0.006           | 0.029 | 8.43E-01 |                    | 1.01E-04       |
| rs876793                           | 1:237852083     | T/C   | 0.65                       | 0.018 | 0.003 | 5.69E-11 | 25                               | 14500     | 0.66            | 0.036           | 0.029 | 2.04E-01 |                    | 1.46E-04       |
| rs9288999                          | 3:114147927     | A/G   | 0.74                       | 0.017 | 0.003 | 1.50E-09 | 25                               | 14500     | 0.73            | 0.001           | 0.030 | 9.78E-01 |                    | 1.18E-04       |
| rs9302604                          | 16:69576894     | G/A   | 0.44                       | 0.019 | 0.003 | 3.29E-13 | 25                               | 14500     | 0.43            | -0.015          | 0.027 | 5.77E-01 |                    | 1.72E-04       |
| rs9323328*                         | 14:58653514     | A/G   | 0.46                       | 0.014 | 0.003 | 2.55E-08 | 25                               | 14500     | 0.45            | -0.039          | 0.026 | 1.33E-01 |                    | 1.01E-04       |
| rs9423279                          | 10:125680419    | C/G   | 0.36                       | 0.019 | 0.003 | 3.06E-12 | 1                                | 657       | Excluded for MR |                 |       |          |                    |                |
| rs951740                           | 1:44011737      | A/G   | 0.62                       | 0.030 | 0.003 | 3.82E-29 | 25                               | 14500     | 0.61            | -0.026          | 0.027 | 3.45E-01 |                    | 4.09E-04       |
| rs9540731*                         | 13:66949370     | C/T   | 0.49                       | 0.018 | 0.003 | 3.42E-12 | 25                               | 14500     | 0.50            | -0.036          | 0.029 | 2.21E-01 |                    | 1.57E-04       |
| rs9545155                          | 13:80191873     | T/C   | 0.52                       | 0.016 | 0.003 | 3.04E-10 | 25                               | 14500     | 0.53            | 0.008           | 0.027 | 7.73E-01 |                    | 1.29E-04       |
| rs9826984                          | 3:131945722     | G/A   | 0.46                       | 0.014 | 0.003 | 3.87E-08 | 25                               | 14500     | 0.44            | -0.006          | 0.027 | 8.16E-01 |                    | 9.80E-05       |
| rs9922607                          | 16:17570220     | C/T   | 0.80                       | 0.022 | 0.003 | 3.42E-12 | 25                               | 14500     | 0.80            | -0.045          | 0.034 | 1.78E-01 |                    | 1.57E-04       |
| rs9941217                          | 16:18050926     | C/G   | 0.65                       | 0.019 | 0.003 | 3.50E-12 | 25                               | 14500     | 0.67            | 0.012           | 0.029 | 6.68E-01 |                    | 1.57E-04       |
| <b>HLA-DRB1*04: 1 or 2 alleles</b> |                 |       |                            |       |       |          |                                  |           |                 |                 |       |          |                    |                |
| rs1008078                          | 1:91189731      | T/C   | 0.40                       | 0.023 | 0.003 | 1.63E-18 | 23                               | 3982      | 0.42            | -0.049          | 0.051 | 3.38E-01 |                    | 2.50E-04       |
| rs1022376                          | 2:22067213      | T/C   | 0.48                       | 0.015 | 0.003 | 1.66E-08 | 23                               | 3982      | 0.49            | 0.038           | 0.051 | 4.55E-01 |                    | 1.09E-04       |
| rs10233018                         | 7:117523709     | G/A   | 0.52                       | 0.025 | 0.003 | 4.77E-22 | 23                               | 3982      | 0.50            | 0.001           | 0.050 | 9.87E-01 |                    | 3.03E-04       |
| rs10279261                         | 7:133589846     | G/A   | 0.38                       | 0.019 | 0.003 | 6.05E-13 | 23                               | 3982      | 0.39            | -0.049          | 0.053 | 3.54E-01 |                    | 1.68E-04       |
| rs1030015*                         | 7:78139581      | T/G   | 0.52                       | 0.014 | 0.003 | 2.15E-08 | 23                               | 3982      | 0.50            | 0.014           | 0.058 | 8.05E-01 |                    | 1.02E-04       |
| rs10490159                         | 2:51341259      | T/C   | 0.39                       | 0.017 | 0.003 | 3.86E-11 | 24                               | 3998      | 0.38            | 0.061           | 0.052 | 2.41E-01 |                    | 1.42E-04       |
| rs1050847                          | 16:87443734     | C/T   | 0.44                       | 0.015 | 0.003 | 7.37E-09 | 23                               | 3982      | 0.46            | 0.002           | 0.053 | 9.65E-01 |                    | 1.08E-04       |
| rs10789369                         | 1:73824909      | A/G   | 0.38                       | 0.023 | 0.003 | 3.39E-19 | 23                               | 3982      | 0.42            | -0.074          | 0.052 | 1.53E-01 |                    | 2.60E-04       |
| rs10853981                         | 19:4965064      | A/G   | 0.33                       | 0.015 | 0.003 | 4.88E-08 | 23                               | 3982      | 0.32            | 0.053           | 0.073 | 4.74E-01 |                    | 9.67E-05       |
| rs10858334                         | 9:137989785     | G/C   | 0.14                       | 0.023 | 0.004 | 1.18E-09 | 23                               | 3982      | 0.13            | 0.009           | 0.077 | 9.10E-01 |                    | 1.26E-04       |
| rs10885480                         | 10:115378364    | T/C   | 0.72                       | 0.019 | 0.003 | 3.83E-11 | 23                               | 3982      | 0.71            | 0.006           | 0.056 | 9.21E-01 |                    | 1.42E-04       |
| rs10914684                         | 1:33795572      | G/A   | 0.68                       | 0.016 | 0.003 | 6.32E-09 | 23                               | 3982      | 0.68            | 0.085           | 0.055 | 1.21E-01 |                    | 1.09E-04       |
| rs10945141                         | 6:69470709      | A/G   | 0.26                       | 0.018 | 0.003 | 3.59E-10 | 23                               | 3982      | 0.27            | 0.058           | 0.057 | 3.04E-01 |                    | 1.28E-04       |
| rs10953957                         | 7:121954709     | A/G   | 0.39                       | 0.014 | 0.003 | 3.66E-08 | 23                               | 3982      | 0.38            | 0.061           | 0.051 | 2.38E-01 |                    | 9.84E-05       |
| rs10966092                         | 9:23831658      | T/C   | 0.73                       | 0.020 | 0.003 | 1.12E-12 | 23                               | 3982      | 0.73            | -0.030          | 0.056 | 5.86E-01 |                    | 1.64E-04       |
| rs11057005                         | 12:16748721     | A/G   | 0.56                       | 0.016 | 0.003 | 9.12E-10 | 23                               | 3982      | 0.59            | -0.081          | 0.053 | 1.26E-01 |                    | 1.22E-04       |
| rs1106363                          | 11:131966264    | T/C   | 0.34                       | 0.017 | 0.003 | 9.20E-11 | 23                               | 3982      | 0.36            | -0.044          | 0.053 | 4.07E-01 |                    | 1.36E-04       |
| rs11076962                         | 16:5811367      | C/T   | 0.28                       | 0.018 | 0.003 | 1.20E-10 | 23                               | 3982      | 0.28            | -0.057          | 0.057 | 3.12E-01 |                    | 1.35E-04       |
| rs1108130                          | 13:100648356    | A/T   | 0.21                       | 0.024 | 0.003 | 1.57E-14 | 22                               | 3951      | 0.21            | 0.055           | 0.063 | 3.81E-01 |                    | 1.92E-04       |
| rs1109480                          | 12:121083279    | G/A   | 0.62                       | 0.017 | 0.003 | 1.84E-10 | 23                               | 3982      | 0.62            | -0.028          | 0.053 | 5.99E-01 |                    | 1.32E-04       |
| rs11128203                         | 3:71064431      | A/T   | 0.53                       | 0.020 | 0.003 | 1.29E-15 | 11                               | 2241      | Excluded for MR |                 |       |          |                    |                |
| rs11162019                         | 1:87913176      | C/T   | 0.64                       | 0.015 | 0.003 | 5.06E-09 | 23                               | 3982      | 0.65            | 0.041           | 0.075 | 5.80E-01 |                    | 1.11E-04       |
| rs1116690                          | 4:143510148     | G/A   | 0.74                       | 0.016 | 0.003 | 2.16E-08 | 22                               | 3951      | 0.72            | 0.011           | 0.060 | 8.49E-01 |                    | 1.02E-04       |
| rs1126757*                         | 19:55879872     | T/C   | 0.47                       | 0.014 | 0.003 | 2.92E-08 | 23                               | 3978      | 0.47            | -0.002          | 0.054 | 9.78E-01 |                    | 1.00E-04       |
| rs112725451                        | 4:68017710      | T/C   | 0.17                       | 0.026 | 0.003 | 1.65E-14 | 24                               | 3998      | 0.18            | Excluded for MR |       |          |                    |                |

| SNP         | Chr:Pos(GRCh37) | EA/BA | Smoking initiation (GSCAN) |       |       |          | Parkinson's disease (Courage-PD) |           |      |        |       |          |                    |                |
|-------------|-----------------|-------|----------------------------|-------|-------|----------|----------------------------------|-----------|------|--------|-------|----------|--------------------|----------------|
|             |                 |       | EAF                        | Beta  | SE    | P-value  | N studies                        | N samples | EAF  | Beta   | SE    | P-value  | I <sup>2</sup> (%) | R <sup>2</sup> |
| rs113230003 | 19:18460956     | G/A   | 0.74                       | 0.019 | 0.003 | 1.05E-10 | 23                               | 3982      | 0.76 | -0.030 | 0.062 | 6.30E-01 |                    | 1.35E-04       |
| rs1139897   | 16:720986       | G/A   | 0.77                       | 0.024 | 0.003 | 1.77E-15 | 22                               | 3908      | 0.77 | 0.040  | 0.062 | 5.19E-01 |                    | 2.06E-04       |
| rs1150668   | 6:28129789      | T/G   | 0.58                       | 0.019 | 0.003 | 8.54E-13 | 23                               | 3982      | 0.62 | -0.072 | 0.053 | 1.78E-01 |                    | 1.67E-04       |
| rs11594623  | 10:103960351    | C/T   | 0.23                       | 0.027 | 0.003 | 7.45E-20 | 23                               | 3982      | 0.22 | -0.007 | 0.061 | 9.06E-01 |                    | 2.70E-04       |
| rs1160685   | 4:94052854      | G/C   | 0.45                       | 0.015 | 0.003 | 2.31E-09 | 24                               | 3998      | 0.46 |        |       |          | Excluded for MR    |                |
| rs11611651  | 12:133380790    | A/G   | 0.09                       | 0.027 | 0.005 | 2.05E-09 | 21                               | 3844      | 0.08 | -0.051 | 0.096 | 5.95E-01 |                    | 1.17E-04       |
| rs11642231  | 16:89608702     | G/A   | 0.63                       | 0.016 | 0.003 | 3.44E-09 | 23                               | 3982      | 0.64 | 0.114  | 0.068 | 9.40E-02 |                    | 1.13E-04       |
| rs11713899  | 3:2365026       | C/A   | 0.17                       | 0.019 | 0.003 | 3.15E-08 | 23                               | 3982      | 0.17 | 0.072  | 0.067 | 2.85E-01 |                    | 9.93E-05       |
| rs6050446†  | 20:25195509     | G/C   | 0.95                       | 0.054 | 0.008 | 8.80E-13 | 16                               | 3493      | 0.97 | 0.092  | 0.175 | 5.98E-01 |                    | 2.81E-04       |
| rs117657830 | 16:75766873     | A/G   | 0.96                       | 0.038 | 0.006 | 3.18E-09 | 22                               | 3951      | 0.96 | -0.094 | 0.133 | 4.79E-01 |                    | 1.14E-04       |
| rs11768481  | 7:96629103      | C/A   | 0.66                       | 0.019 | 0.003 | 5.23E-12 | 7                                | 1842      |      |        |       |          | Excluded for MR    |                |
| rs117734003 | 19:51129745     | C/G   | 0.07                       | 0.030 | 0.005 | 2.57E-09 | 16                               | 3315      |      |        |       |          | Excluded for MR    |                |
| rs11783093  | 8:27425349      | C/T   | 0.84                       | 0.047 | 0.003 | 2.07E-41 | 23                               | 3982      | 0.83 | 0.004  | 0.068 | 9.55E-01 |                    | 5.91E-04       |
| rs11791671  | 9:3398679       | T/C   | 0.07                       | 0.028 | 0.005 | 4.24E-08 | 23                               | 3982      | 0.07 | -0.025 | 0.106 | 8.17E-01 |                    | 9.74E-05       |
| rs118202    | 6:111658371     | G/T   | 0.19                       | 0.037 | 0.003 | 1.90E-29 | 23                               | 3982      | 0.21 | -0.140 | 0.065 | 2.99E-02 |                    | 4.12E-04       |
| rs1187820   | 3:173072584     | C/T   | 0.56                       | 0.014 | 0.003 | 2.69E-08 | 23                               | 3982      | 0.57 | -0.018 | 0.055 | 7.50E-01 |                    | 1.00E-04       |
| rs12022778  | 1:50603995      | C/A   | 0.20                       | 0.027 | 0.003 | 3.18E-17 | 23                               | 3982      | 0.19 | 0.070  | 0.091 | 4.46E-01 |                    | 2.32E-04       |
| rs12027999  | 1:154206358     | T/C   | 0.88                       | 0.024 | 0.004 | 5.33E-10 | 23                               | 3967      | 0.89 |        |       |          | Excluded for MR    |                |
| rs12130857  | 1:7791461       | G/A   | 0.68                       | 0.018 | 0.003 | 3.65E-11 | 23                               | 3982      | 0.69 | 0.001  | 0.055 | 9.85E-01 |                    | 1.42E-04       |
| rs12195240  | 6:98636905      | A/G   | 0.28                       | 0.025 | 0.003 | 1.08E-18 | 23                               | 3982      | 0.28 | 0.019  | 0.056 | 7.28E-01 |                    | 2.53E-04       |
| rs12244388  | 10:104640052    | A/G   | 0.35                       | 0.026 | 0.003 | 4.31E-22 | 24                               | 3998      | 0.34 | 0.022  | 0.052 | 6.78E-01 |                    | 3.03E-04       |
| rs12474587  | 2:162802993     | T/G   | 0.43                       | 0.024 | 0.003 | 4.83E-21 | 23                               | 3982      | 0.40 | 0.077  | 0.053 | 1.48E-01 |                    | 2.88E-04       |
| rs12517438  | 5:30842054      | G/T   | 0.54                       | 0.015 | 0.003 | 1.89E-09 | 23                               | 3982      | 0.52 | 0.006  | 0.051 | 9.11E-01 |                    | 1.17E-04       |
| rs12633090  | 3:83241365      | G/C   | 0.82                       | 0.023 | 0.003 | 3.16E-12 | 23                               | 3982      | 0.80 | 0.099  | 0.064 | 1.22E-01 |                    | 1.58E-04       |
| rs12714017  | 2:80999398      | C/T   | 0.51                       | 0.015 | 0.003 | 3.65E-09 | 23                               | 3982      | 0.51 | -0.009 | 0.077 | 9.02E-01 |                    | 1.18E-04       |
| rs12739243  | 1:210302043     | T/C   | 0.78                       | 0.021 | 0.003 | 4.45E-12 | 23                               | 3982      | 0.78 | 0.077  | 0.087 | 3.73E-01 |                    | 1.56E-04       |
| rs12878369  | 14:28346502     | A/C   | 0.41                       | 0.017 | 0.003 | 1.60E-11 | 24                               | 3998      | 0.41 | 0.037  | 0.051 | 4.75E-01 |                    | 1.48E-04       |
| rs12918191  | 16:50945156     | A/G   | 0.76                       | 0.020 | 0.003 | 3.14E-11 | 23                               | 3982      | 0.76 | -0.045 | 0.060 | 4.48E-01 |                    | 1.43E-04       |
| rs1291821   | 10:11133823     | G/A   | 0.53                       | 0.014 | 0.003 | 1.39E-08 | 22                               | 3951      | 0.53 | 0.081  | 0.051 | 1.14E-01 |                    | 1.05E-04       |
| rs13007361  | 2:166250244     | A/G   | 0.21                       | 0.018 | 0.003 | 2.29E-08 | 23                               | 3982      | 0.20 | 0.037  | 0.063 | 5.49E-01 |                    | 1.01E-04       |
| rs13110073  | 4:147797913     | T/C   | 0.60                       | 0.025 | 0.003 | 3.24E-21 | 23                               | 3982      | 0.61 | -0.027 | 0.052 | 5.99E-01 |                    | 2.90E-04       |
| rs13261666  | 8:59814666      | G/T   | 0.48                       | 0.020 | 0.003 | 4.36E-15 | 23                               | 3982      | 0.48 | 0.040  | 0.051 | 4.30E-01 |                    | 2.00E-04       |
| rs13392222  | 2:100672408     | A/C   | 0.86                       | 0.023 | 0.004 | 1.93E-10 | 22                               | 3951      | 0.86 | 0.024  | 0.075 | 7.44E-01 |                    | 1.31E-04       |
| rs13437771  | 7:99071478      | A/G   | 0.84                       | 0.027 | 0.004 | 1.39E-14 | 23                               | 3982      | 0.85 | -0.030 | 0.071 | 6.68E-01 |                    | 1.93E-04       |
| rs1373178   | 18:49967811     | T/G   | 0.41                       | 0.020 | 0.003 | 4.16E-15 | 23                               | 3982      | 0.42 | -0.021 | 0.073 | 7.73E-01 |                    | 2.00E-04       |
| rs1381287   | 14:98597552     | T/C   | 0.47                       | 0.018 | 0.003 | 1.81E-12 | 23                               | 3982      | 0.48 | -0.007 | 0.051 | 8.94E-01 |                    | 1.62E-04       |
| rs1381775   | 11:42442826     | T/C   | 0.29                       | 0.016 | 0.003 | 2.79E-08 | 23                               | 3982      | 0.29 | 0.063  | 0.056 | 2.63E-01 |                    | 1.00E-04       |
| rs1385108   | 5:154839646     | T/C   | 0.24                       | 0.019 | 0.003 | 3.84E-10 | 23                               | 3982      | 0.22 | 0.162  | 0.060 | 6.60E-03 |                    | 1.27E-04       |
| rs13906     | 12:49952394     | C/T   | 0.89                       | 0.025 | 0.004 | 1.98E-09 | 23                               | 3982      | 0.88 | 0.027  | 0.080 | 7.33E-01 |                    | 1.17E-04       |

| SNP         | Chr:Pos(GRCh37) | EA/BA | Smoking initiation (GSCAN) |       |       |          | Parkinson's disease (Courage-PD) |           |                 |                 |       |          |                    |                |
|-------------|-----------------|-------|----------------------------|-------|-------|----------|----------------------------------|-----------|-----------------|-----------------|-------|----------|--------------------|----------------|
|             |                 |       | EAF                        | Beta  | SE    | P-value  | N studies                        | N samples | EAF             | Beta            | SE    | P-value  | I <sup>2</sup> (%) | R <sup>2</sup> |
| rs1435672   | 15:36399479     | C/T   | 0.56                       | 0.014 | 0.003 | 3.82E-08 | 23                               | 3982      | 0.53            | 0.044           | 0.051 | 3.88E-01 |                    | 9.80E-05       |
| rs1445649   | 2:155682556     | C/T   | 0.54                       | 0.021 | 0.003 | 8.48E-16 | 24                               | 3998      | 0.53            | Excluded for MR |       |          |                    |                |
| rs1449012   | 3:159048333     | C/T   | 0.54                       | 0.015 | 0.003 | 1.77E-09 | 23                               | 3982      | 0.54            | -0.049          | 0.051 | 3.45E-01 |                    | 1.18E-04       |
| rs147052174 | 1:179783167     | T/G   | 0.02                       | 0.062 | 0.010 | 2.30E-10 | 12                               | 2372      | Excluded for MR |                 |       |          |                    |                |
| rs1514176   | 1:74991596      | G/A   | 0.42                       | 0.019 | 0.003 | 7.67E-14 | 23                               | 3982      | 0.43            | -0.012          | 0.052 | 8.16E-01 |                    | 1.81E-04       |
| rs1549979   | 3:85460131      | C/T   | 0.38                       | 0.025 | 0.003 | 8.80E-21 | 23                               | 3982      | 0.40            | -0.110          | 0.051 | 3.26E-02 |                    | 2.85E-04       |
| rs160631    | 6:52895230      | T/G   | 0.27                       | 0.017 | 0.003 | 1.87E-09 | 24                               | 3998      | 0.28            | 0.033           | 0.058 | 5.63E-01 |                    | 1.17E-04       |
| rs16826827  | 2:147825689     | T/C   | 0.88                       | 0.022 | 0.004 | 9.17E-09 | 23                               | 3982      | 0.89            | -0.068          | 0.080 | 3.95E-01 |                    | 1.07E-04       |
| rs1713676*  | 11:113660576    | A/G   | 0.48                       | 0.017 | 0.003 | 5.38E-11 | 23                               | 3982      | 0.48            | 0.014           | 0.056 | 8.07E-01 |                    | 1.40E-04       |
| rs1714521   | 3:158284861     | A/C   | 0.59                       | 0.016 | 0.003 | 3.07E-10 | 23                               | 3982      | 0.60            | 0.007           | 0.051 | 8.83E-01 |                    | 1.29E-04       |
| rs17197663  | 13:38172867     | G/A   | 0.88                       | 0.022 | 0.004 | 2.06E-08 | 24                               | 3998      | 0.88            | 0.013           | 0.077 | 8.70E-01 |                    | 1.02E-04       |
| rs17229285  | 2:199523122     | C/T   | 0.50                       | 0.015 | 0.003 | 1.27E-09 | 23                               | 3982      | 0.51            | 0.012           | 0.050 | 8.09E-01 |                    | 1.20E-04       |
| rs1733760   | 10:56698174     | C/T   | 0.51                       | 0.015 | 0.003 | 6.70E-09 | 23                               | 3982      | 0.51            | 0.013           | 0.052 | 8.01E-01 |                    | 1.09E-04       |
| rs1737329   | 6:163807748     | G/C   | 0.74                       | 0.017 | 0.003 | 5.08E-09 | 23                               | 3982      | 0.73            | 0.002           | 0.060 | 9.67E-01 |                    | 1.11E-04       |
| rs17554906  | 6:92226609      | C/G   | 0.44                       | 0.014 | 0.003 | 3.14E-08 | 23                               | 3982      | 0.44            | Excluded for MR |       |          |                    |                |
| rs1772572   | 13:81191176     | C/A   | 0.68                       | 0.017 | 0.003 | 5.62E-10 | 24                               | 3998      | 0.68            | -0.044          | 0.054 | 4.10E-01 |                    | 1.25E-04       |
| rs1811739   | 14:77529375     | A/G   | 0.25                       | 0.018 | 0.003 | 5.97E-10 | 23                               | 3982      | 0.24            | 0.093           | 0.074 | 2.07E-01 |                    | 1.25E-04       |
| rs1889571   | 1:32195819      | G/T   | 0.13                       | 0.022 | 0.004 | 4.19E-09 | 23                               | 3982      | 0.12            | 0.063           | 0.077 | 4.14E-01 |                    | 1.12E-04       |
| rs1901477   | 2:104126983     | G/A   | 0.51                       | 0.030 | 0.003 | 2.07E-31 | 23                               | 3982      | 0.51            | 0.051           | 0.051 | 3.12E-01 |                    | 4.63E-04       |
| rs2010921   | 11:132098205    | A/G   | 0.31                       | 0.017 | 0.003 | 2.47E-10 | 23                               | 3982      | 0.29            | 0.102           | 0.056 | 6.91E-02 |                    | 1.30E-04       |
| rs2063976   | 8:91096366      | C/T   | 0.34                       | 0.020 | 0.003 | 7.45E-14 | 23                               | 3982      | 0.34            | 0.033           | 0.054 | 5.39E-01 |                    | 1.81E-04       |
| rs2155646   | 11:112912811    | C/T   | 0.40                       | 0.038 | 0.003 | 9.44E-48 | 23                               | 3982      | 0.39            | 0.036           | 0.051 | 4.78E-01 |                    | 6.85E-04       |
| rs2173019   | 5:167614971     | A/T   | 0.18                       | 0.028 | 0.003 | 2.98E-17 | 23                               | 3982      | 0.16            | 0.116           | 0.068 | 8.84E-02 |                    | 2.32E-04       |
| rs221988    | 3:64234307      | A/C   | 0.62                       | 0.015 | 0.003 | 1.43E-08 | 23                               | 3982      | 0.63            | -0.021          | 0.053 | 6.99E-01 |                    | 1.05E-04       |
| rs2279829   | 3:147106319     | C/T   | 0.78                       | 0.017 | 0.003 | 2.05E-08 | 23                               | 3982      | 0.79            | -0.099          | 0.062 | 1.11E-01 |                    | 1.02E-04       |
| rs2289791   | 15:67476952     | G/T   | 0.75                       | 0.018 | 0.003 | 2.01E-09 | 11                               | 2241      | Excluded for MR |                 |       |          |                    |                |
| rs2319545   | 3:147719648     | A/C   | 0.15                       | 0.023 | 0.004 | 8.30E-11 | 23                               | 3982      | 0.13            | 0.018           | 0.076 | 8.12E-01 |                    | 1.37E-04       |
| rs2378662   | 9:86707289      | A/G   | 0.54                       | 0.015 | 0.003 | 2.67E-09 | 23                               | 3982      | 0.53            | 0.065           | 0.052 | 2.09E-01 |                    | 1.15E-04       |
| rs2526390   | 3:50192760      | T/C   | 0.33                       | 0.020 | 0.003 | 3.62E-14 | 23                               | 3982      | 0.33            | -0.002          | 0.053 | 9.67E-01 |                    | 1.86E-04       |
| rs2587507*  | 17:77790135     | T/C   | 0.50                       | 0.015 | 0.003 | 8.69E-09 | 23                               | 3980      | 0.50            | -0.021          | 0.060 | 7.21E-01 |                    | 1.07E-04       |
| rs2710634   | 2:32808804      | T/C   | 0.48                       | 0.018 | 0.003 | 3.36E-12 | 23                               | 3982      | 0.50            | -0.115          | 0.052 | 2.60E-02 |                    | 1.57E-04       |
| rs2796793   | 10:36634124     | A/G   | 0.45                       | 0.014 | 0.003 | 1.55E-08 | 22                               | 3785      | 0.44            | 0.013           | 0.052 | 8.01E-01 |                    | 1.04E-04       |
| rs281296    | 15:47685010     | A/G   | 0.36                       | 0.025 | 0.003 | 1.59E-20 | 23                               | 3982      | 0.37            | -0.103          | 0.054 | 5.44E-02 |                    | 2.80E-04       |
| rs28441558  | 17:7803118      | T/C   | 0.94                       | 0.036 | 0.006 | 1.24E-10 | 16                               | 3315      | Excluded for MR |                 |       |          |                    |                |
| rs2901785   | 1:174104743     | G/A   | 0.55                       | 0.017 | 0.003 | 1.47E-11 | 23                               | 3982      | 0.55            | 0.091           | 0.052 | 7.75E-02 |                    | 1.48E-04       |
| rs290601    | 8:115374642     | T/C   | 0.27                       | 0.016 | 0.003 | 1.14E-08 | 23                               | 3982      | 0.27            | -0.024          | 0.081 | 7.69E-01 |                    | 1.06E-04       |
| rs2925128   | 14:98362355     | T/C   | 0.39                       | 0.017 | 0.003 | 3.67E-10 | 23                               | 3982      | 0.37            | 0.150           | 0.053 | 4.32E-03 |                    | 1.34E-04       |
| rs2939756   | 11:41436297     | G/A   | 0.52                       | 0.016 | 0.003 | 7.45E-10 | 23                               | 3982      | 0.53            | 0.046           | 0.051 | 3.60E-01 |                    | 1.23E-04       |
| rs3218116   | 6:41901763      | C/T   | 0.74                       | 0.020 | 0.003 | 1.05E-11 | 23                               | 3982      | 0.77            | -0.084          | 0.059 | 1.57E-01 |                    | 1.50E-04       |

| SNP        | Chr:Pos(GRCh37) | EA/BA | Smoking initiation (GSCAN) |       |       |          | Parkinson's disease (Courage-PD) |           |                 |                 |       |          |                    |                |
|------------|-----------------|-------|----------------------------|-------|-------|----------|----------------------------------|-----------|-----------------|-----------------|-------|----------|--------------------|----------------|
|            |                 |       | EAF                        | Beta  | SE    | P-value  | N studies                        | N samples | EAF             | Beta            | SE    | P-value  | I <sup>2</sup> (%) | R <sup>2</sup> |
| rs329124   | 5:133865452     | A/G   | 0.57                       | 0.016 | 0.003 | 1.96E-10 | 23                               | 3982      | 0.58            | -0.087          | 0.051 | 8.52E-02 |                    | 1.31E-04       |
| rs34342129 | 18:5872472      | T/C   | 0.49                       | 0.014 | 0.003 | 2.13E-08 | 24                               | 3998      | 0.51            | -0.049          | 0.052 | 3.44E-01 |                    | 1.02E-04       |
| rs34399632 | 2:137571174     | G/A   | 0.23                       | 0.019 | 0.003 | 1.46E-10 | 24                               | 3998      | 0.21            | Excluded for MR |       |          |                    |                |
| rs34553878 | 9:134334588     | G/A   | 0.11                       | 0.025 | 0.004 | 1.17E-09 | 17                               | 3451      | Excluded for MR |                 |       |          |                    |                |
| rs35375873 | 5:43190647      | G/C   | 0.89                       | 0.027 | 0.004 | 3.29E-11 | 16                               | 3315      | Excluded for MR |                 |       |          |                    |                |
| rs35656245 | 1:190957480     | A/G   | 0.28                       | 0.016 | 0.003 | 2.23E-08 | 22                               | 3951      | 0.28            | 0.108           | 0.055 | 5.08E-02 |                    | 1.02E-04       |
| rs359247   | 2:60477052      | T/A   | 0.64                       | 0.022 | 0.003 | 9.89E-17 | 23                               | 3982      | 0.62            | -0.033          | 0.052 | 5.34E-01 |                    | 2.24E-04       |
| rs3764351  | 17:37824339     | G/A   | 0.34                       | 0.015 | 0.003 | 3.89E-08 | 23                               | 3982      | 0.36            | 0.053           | 0.054 | 3.30E-01 |                    | 9.80E-05       |
| rs3810496  | 20:62406886     | C/T   | 0.62                       | 0.016 | 0.003 | 1.54E-09 | 23                               | 3982      | 0.60            | 0.089           | 0.054 | 1.00E-01 |                    | 1.19E-04       |
| rs3811038  | 2:113240183     | C/T   | 0.28                       | 0.019 | 0.003 | 1.58E-11 | 23                               | 3982      | 0.27            | -0.022          | 0.078 | 7.76E-01 |                    | 1.47E-04       |
| rs3820277  | 1:18436657      | G/T   | 0.47                       | 0.019 | 0.003 | 1.57E-13 | 23                               | 3982      | 0.51            | -0.051          | 0.051 | 3.12E-01 |                    | 1.77E-04       |
| rs3847244  | 9:3025368       | T/C   | 0.47                       | 0.019 | 0.003 | 2.60E-13 | 23                               | 3982      | 0.47            | -0.006          | 0.052 | 9.05E-01 |                    | 1.74E-04       |
| rs3850736  | 8:64912021      | G/C   | 0.47                       | 0.019 | 0.003 | 6.43E-14 | 23                               | 3982      | 0.46            | Excluded for MR |       |          |                    |                |
| rs3934797  | 4:112467612     | G/A   | 0.82                       | 0.021 | 0.003 | 1.12E-10 | 23                               | 3982      | 0.83            | 0.003           | 0.069 | 9.61E-01 |                    | 1.35E-04       |
| rs4044321  | 5:166989513     | A/G   | 0.36                       | 0.023 | 0.003 | 1.75E-17 | 23                               | 3982      | 0.36            | -0.029          | 0.054 | 5.97E-01 |                    | 2.35E-04       |
| rs4140932  | 4:15458598      | T/A   | 0.57                       | 0.014 | 0.003 | 4.89E-08 | 23                               | 3982      | 0.58            | Excluded for MR |       |          |                    |                |
| rs42417    | 5:94198290      | T/C   | 0.69                       | 0.017 | 0.003 | 8.27E-10 | 23                               | 3982      | 0.69            | -0.065          | 0.056 | 2.47E-01 |                    | 1.22E-04       |
| rs4264267  | 13:38359676     | T/C   | 0.53                       | 0.015 | 0.003 | 6.82E-09 | 23                               | 3982      | 0.54            | 0.006           | 0.052 | 9.06E-01 |                    | 1.09E-04       |
| rs4310804  | 15:96858409     | C/G   | 0.75                       | 0.018 | 0.003 | 7.55E-10 | 21                               | 3630      | 0.76            | Excluded for MR |       |          |                    |                |
| rs4326350  | 8:10763655      | C/G   | 0.51                       | 0.018 | 0.003 | 5.16E-12 | 23                               | 3982      | 0.53            | Excluded for MR |       |          |                    |                |
| rs4476253  | 18:25253297     | G/A   | 0.76                       | 0.018 | 0.003 | 5.78E-10 | 24                               | 3998      | 0.77            | -0.027          | 0.061 | 6.52E-01 |                    | 1.25E-04       |
| rs45444697 | 1:155034632     | G/C   | 0.21                       | 0.020 | 0.003 | 2.72E-10 | 23                               | 3982      | 0.20            | -0.009          | 0.064 | 8.83E-01 |                    | 1.30E-04       |
| rs4674993  | 2:226332033     | A/G   | 0.80                       | 0.024 | 0.003 | 4.85E-14 | 24                               | 3998      | 0.81            | Excluded for MR |       |          |                    |                |
| rs4727189  | 7:88442568      | C/T   | 0.34                       | 0.015 | 0.003 | 3.00E-08 | 23                               | 3982      | 0.34            | 0.080           | 0.053 | 1.28E-01 |                    | 9.97E-05       |
| rs4752018  | 10:118678712    | A/C   | 0.23                       | 0.019 | 0.003 | 4.42E-10 | 24                               | 3998      | 0.23            | 0.008           | 0.060 | 8.93E-01 |                    | 1.26E-04       |
| rs4759229  | 12:56474480     | G/A   | 0.66                       | 0.016 | 0.003 | 6.53E-09 | 23                               | 3982      | 0.64            | -0.023          | 0.055 | 6.83E-01 |                    | 1.09E-04       |
| rs4790874  | 17:1995177      | T/C   | 0.53                       | 0.017 | 0.003 | 8.43E-12 | 23                               | 3982      | 0.52            | 0.087           | 0.052 | 9.16E-02 |                    | 1.52E-04       |
| rs4818005  | 21:40588819     | G/A   | 0.42                       | 0.020 | 0.003 | 1.09E-14 | 23                               | 3982      | 0.44            | -0.051          | 0.051 | 3.17E-01 |                    | 2.03E-04       |
| rs4822102  | 22:42698430     | C/T   | 0.38                       | 0.017 | 0.003 | 2.78E-10 | 23                               | 3982      | 0.39            | 0.078           | 0.052 | 1.31E-01 |                    | 1.29E-04       |
| rs4837631  | 9:122061948     | C/T   | 0.55                       | 0.015 | 0.003 | 2.03E-09 | 23                               | 3982      | 0.56            | 0.075           | 0.052 | 1.46E-01 |                    | 1.17E-04       |
| rs4877285  | 9:81354129      | G/A   | 0.33                       | 0.018 | 0.003 | 2.10E-11 | 23                               | 3982      | 0.36            | -0.084          | 0.055 | 1.30E-01 |                    | 1.46E-04       |
| rs4912332  | 1:58815243      | T/C   | 0.49                       | 0.014 | 0.003 | 2.94E-08 | 23                               | 3982      | 0.48            | 0.071           | 0.052 | 1.67E-01 |                    | 9.97E-05       |
| rs540860   | 11:121530888    | G/A   | 0.54                       | 0.018 | 0.003 | 5.75E-12 | 23                               | 3982      | 0.53            | 0.048           | 0.051 | 3.40E-01 |                    | 1.54E-04       |
| rs55786907 | 13:59871584     | G/A   | 0.16                       | 0.019 | 0.003 | 1.84E-08 | 23                               | 3982      | 0.16            | -0.024          | 0.069 | 7.33E-01 |                    | 1.03E-04       |
| rs58400863 | 4:31184484      | G/A   | 0.65                       | 0.020 | 0.003 | 4.89E-14 | 23                               | 3982      | 0.65            | 0.001           | 0.054 | 9.88E-01 |                    | 1.84E-04       |
| rs59537158 | 4:28246049      | T/C   | 0.21                       | 0.022 | 0.003 | 4.62E-13 | 24                               | 3998      | 0.22            | Excluded for MR |       |          |                    |                |
| rs6073075  | 20:42015801     | T/A   | 0.18                       | 0.019 | 0.003 | 2.44E-08 | 23                               | 3982      | 0.19            | -0.010          | 0.067 | 8.79E-01 |                    | 1.01E-04       |
| rs61533748 | 2:22582968      | C/T   | 0.38                       | 0.017 | 0.003 | 2.82E-11 | 23                               | 3982      | 0.38            | -0.026          | 0.053 | 6.17E-01 |                    | 1.44E-04       |
| rs61886926 | 11:64133552     | C/T   | 0.62                       | 0.018 | 0.003 | 7.30E-12 | 23                               | 3982      | 0.63            | -0.052          | 0.052 | 3.19E-01 |                    | 1.52E-04       |

| SNP        | Chr:Pos(GRCh37) | EA/BA | Smoking initiation (GSCAN) |       |       |          | Parkinson's disease (Courage-PD) |           |                 |                 |       |          |                    |                |  |
|------------|-----------------|-------|----------------------------|-------|-------|----------|----------------------------------|-----------|-----------------|-----------------|-------|----------|--------------------|----------------|--|
|            |                 |       | EAF                        | Beta  | SE    | P-value  | N studies                        | N samples | EAF             | Beta            | SE    | P-value  | I <sup>2</sup> (%) | R <sup>2</sup> |  |
| rs61959481 | 13:55834929     | G/A   | 0.79                       | 0.020 | 0.003 | 7.95E-11 | 23                               | 3982      | 0.78            | 0.025           | 0.062 | 6.89E-01 |                    | 1.37E-04       |  |
| rs62007780 | 15:78025464     | G/T   | 0.58                       | 0.016 | 0.003 | 7.48E-10 | 23                               | 3982      | 0.61            | -0.106          | 0.079 | 1.79E-01 |                    | 1.23E-04       |  |
| rs62193862 | 2:202843875     | A/G   | 0.10                       | 0.024 | 0.004 | 1.99E-08 | 14                               | 2977      | Excluded for MR |                 |       |          |                    |                |  |
| rs62246017 | 3:71483084      | G/A   | 0.68                       | 0.016 | 0.003 | 3.03E-09 | 23                               | 3982      | 0.70            | -0.118          | 0.057 | 3.90E-02 |                    | 1.14E-04       |  |
| rs62340589 | 4:176875795     | C/G   | 0.20                       | 0.017 | 0.003 | 4.31E-08 | 23                               | 3982      | 0.20            | -0.016          | 0.064 | 8.06E-01 |                    | 9.74E-05       |  |
| rs6265*    | 11:27679916     | C/T   | 0.81                       | 0.029 | 0.003 | 2.81E-19 | 23                               | 3982      | 0.81            | -0.008          | 0.070 | 9.09E-01 |                    | 2.62E-04       |  |
| rs6437769  | 3:107997514     | T/C   | 0.58                       | 0.014 | 0.003 | 3.74E-08 | 24                               | 3998      | 0.59            | Excluded for MR |       |          |                    |                |  |
| rs6438436  | 3:117822149     | T/C   | 0.82                       | 0.025 | 0.003 | 5.33E-14 | 23                               | 3982      | 0.81            | 0.058           | 0.067 | 3.87E-01 |                    | 1.84E-04       |  |
| rs644740   | 11:65561468     | C/T   | 0.54                       | 0.014 | 0.003 | 3.67E-08 | 23                               | 3982      | 0.53            | 0.080           | 0.050 | 1.14E-01 |                    | 9.84E-05       |  |
| rs6452785  | 5:87685500      | C/T   | 0.53                       | 0.027 | 0.003 | 4.69E-26 | 23                               | 3982      | 0.53            | -0.020          | 0.052 | 7.03E-01 |                    | 3.60E-04       |  |
| rs6497840  | 16:25351633     | A/G   | 0.71                       | 0.023 | 0.003 | 2.01E-15 | 24                               | 3998      | 0.69            | -0.026          | 0.056 | 6.37E-01 |                    | 2.15E-04       |  |
| rs6568832  | 6:97702876      | A/G   | 0.75                       | 0.019 | 0.003 | 1.74E-10 | 23                               | 3982      | 0.74            | -0.076          | 0.059 | 1.96E-01 |                    | 1.32E-04       |  |
| rs67050670 | 18:39297254     | A/G   | 0.77                       | 0.020 | 0.003 | 2.34E-11 | 23                               | 3982      | 0.74            | 0.167           | 0.074 | 2.41E-02 |                    | 1.45E-04       |  |
| rs6731872  | 2:624205        | G/T   | 0.83                       | 0.032 | 0.003 | 5.35E-21 | 24                               | 3998      | 0.82            | Excluded for MR |       |          |                    |                |  |
| rs6750529  | 2:182027603     | T/C   | 0.74                       | 0.020 | 0.003 | 9.26E-12 | 23                               | 3982      | 0.75            | 0.036           | 0.059 | 5.46E-01 |                    | 1.51E-04       |  |
| rs6756212  | 2:146140132     | C/T   | 0.47                       | 0.034 | 0.003 | 3.49E-40 | 23                               | 3982      | 0.46            | 0.041           | 0.051 | 4.20E-01 |                    | 5.71E-04       |  |
| rs67777803 | 17:27323322     | G/T   | 0.83                       | 0.025 | 0.003 | 3.18E-13 | 24                               | 3998      | 0.83            | 0.037           | 0.068 | 5.89E-01 |                    | 1.72E-04       |  |
| rs6874731  | 5:80263865      | G/T   | 0.48                       | 0.015 | 0.003 | 1.83E-09 | 23                               | 3982      | 0.48            | -0.017          | 0.050 | 7.28E-01 |                    | 1.17E-04       |  |
| rs6890961  | 5:166778503     | C/T   | 0.38                       | 0.019 | 0.003 | 2.13E-13 | 24                               | 3998      | 0.41            | -0.068          | 0.079 | 3.88E-01 |                    | 1.75E-04       |  |
| rs6936160  | 6:100347745     | T/C   | 0.70                       | 0.020 | 0.003 | 4.20E-13 | 23                               | 3982      | 0.68            | 0.074           | 0.073 | 3.15E-01 |                    | 1.70E-04       |  |
| rs6948707  | 7:1870794       | G/T   | 0.42                       | 0.024 | 0.003 | 4.24E-21 | 23                               | 3982      | 0.40            | 0.023           | 0.051 | 6.54E-01 |                    | 2.89E-04       |  |
| rs6986430  | 8:93048104      | T/C   | 0.78                       | 0.024 | 0.003 | 1.99E-15 | 23                               | 3982      | 0.75            | 0.172           | 0.076 | 2.30E-02 |                    | 2.05E-04       |  |
| rs7024924  | 9:8282399       | C/T   | 0.17                       | 0.019 | 0.003 | 1.90E-08 | 23                               | 3982      | 0.16            | 0.008           | 0.067 | 9.06E-01 |                    | 1.03E-04       |  |
| rs7072776  | 10:22032942     | A/G   | 0.29                       | 0.022 | 0.003 | 5.66E-15 | 22                               | 3785      | 0.33            | -0.073          | 0.058 | 2.13E-01 |                    | 1.98E-04       |  |
| rs7134009  | 12:75263193     | T/C   | 0.71                       | 0.016 | 0.003 | 4.30E-08 | 23                               | 3982      | 0.72            | 0.002           | 0.069 | 9.74E-01 |                    | 1.02E-04       |  |
| rs71367544 | 18:77574374     | T/C   | 0.20                       | 0.021 | 0.003 | 8.54E-11 | 23                               | 3982      | 0.18            | 0.044           | 0.066 | 5.11E-01 |                    | 1.37E-04       |  |
| rs71592686 | 5:60121271      | C/T   | 0.27                       | 0.021 | 0.003 | 3.85E-13 | 23                               | 3982      | 0.26            | 0.039           | 0.057 | 4.89E-01 |                    | 1.71E-04       |  |
| rs71602617 | 4:136406155     | C/T   | 0.78                       | 0.018 | 0.003 | 2.10E-08 | 23                               | 3982      | 0.79            | -0.028          | 0.077 | 7.17E-01 |                    | 1.07E-04       |  |
| rs72780746 | 5:103929588     | T/C   | 0.83                       | 0.026 | 0.003 | 2.05E-14 | 23                               | 3982      | 0.82            | -0.004          | 0.066 | 9.52E-01 |                    | 1.90E-04       |  |
| rs72836318 | 17:44121579     | T/C   | 0.75                       | 0.017 | 0.003 | 7.00E-09 | 23                               | 3982      | 0.76            | -0.086          | 0.061 | 1.57E-01 |                    | 1.09E-04       |  |
| rs72938304 | 18:53661743     | G/A   | 0.89                       | 0.027 | 0.004 | 1.36E-11 | 23                               | 3982      | 0.89            | 0.003           | 0.081 | 9.70E-01 |                    | 1.48E-04       |  |
| rs748832   | 3:16851202      | G/A   | 0.37                       | 0.017 | 0.003 | 6.60E-11 | 23                               | 3982      | 0.36            | 0.010           | 0.052 | 8.42E-01 |                    | 1.38E-04       |  |
| rs75919030 | 17:50193197     | T/C   | 0.73                       | 0.021 | 0.003 | 3.35E-13 | 23                               | 3982      | 0.73            | 0.042           | 0.057 | 4.62E-01 |                    | 1.72E-04       |  |
| rs7598402  | 2:50735943      | C/G   | 0.51                       | 0.015 | 0.003 | 7.38E-09 | 23                               | 3982      | 0.52            | Excluded for MR |       |          |                    |                |  |
| rs7631379  | 3:181409057     | C/T   | 0.21                       | 0.021 | 0.003 | 3.94E-11 | 23                               | 3982      | 0.21            | -0.185          | 0.087 | 3.37E-02 |                    | 1.42E-04       |  |
| rs76608582 | 19:4474725      | C/A   | 0.95                       | 0.035 | 0.006 | 4.88E-09 | NA in Courage-PD                 |           |                 |                 |       |          |                    |                |  |
| rs7696257  | 4:137474783     | A/G   | 0.37                       | 0.015 | 0.003 | 6.78E-09 | 23                               | 3982      | 0.34            | -0.021          | 0.054 | 6.94E-01 |                    | 1.09E-04       |  |
| rs77215829 | 12:112618346    | A/C   | 0.87                       | 0.024 | 0.004 | 2.02E-10 | 18                               | 3281      | 0.86            | 0.103           | 0.120 | 3.91E-01 |                    | 1.32E-04       |  |
| rs77283305 | 7:132593831     | G/A   | 0.69                       | 0.015 | 0.003 | 3.91E-08 | 23                               | 3982      | 0.70            | 0.022           | 0.055 | 6.87E-01 |                    | 9.80E-05       |  |

| SNP        | Chr:Pos(GRCh37) | EA/BA | Smoking initiation (GSCAN) |       |       |          | Parkinson's disease (Courage-PD) |           |      |        |       |          |                    |                |
|------------|-----------------|-------|----------------------------|-------|-------|----------|----------------------------------|-----------|------|--------|-------|----------|--------------------|----------------|
|            |                 |       | EAF                        | Beta  | SE    | P-value  | N studies                        | N samples | EAF  | Beta   | SE    | P-value  | I <sup>2</sup> (%) | R <sup>2</sup> |
| rs7743165  | 6:67521222      | G/T   | 0.50                       | 0.019 | 0.003 | 4.15E-14 | 23                               | 3982      | 0.48 | 0.004  | 0.051 | 9.39E-01 |                    | 1.85E-04       |
| rs7809303  | 7:69484366      | G/A   | 0.68                       | 0.021 | 0.003 | 3.48E-15 | 23                               | 3982      | 0.67 | 0.068  | 0.053 | 1.95E-01 |                    | 2.01E-04       |
| rs7836565  | 8:52569449      | C/T   | 0.28                       | 0.016 | 0.003 | 4.36E-08 | 23                               | 3982      | 0.28 | 0.054  | 0.058 | 3.50E-01 |                    | 9.74E-05       |
| rs7920501  | 10:10043159     | T/A   | 0.54                       | 0.016 | 0.003 | 1.25E-09 | 23                               | 3982      | 0.52 |        |       |          | Excluded for MR    |                |
| rs7921378  | 10:63674885     | G/C   | 0.52                       | 0.023 | 0.003 | 6.10E-20 | 23                               | 3982      | 0.52 |        |       |          | Excluded for MR    |                |
| rs7929518  | 11:85980958     | G/A   | 0.77                       | 0.019 | 0.003 | 2.55E-10 | 23                               | 3982      | 0.77 | -0.067 | 0.060 | 2.63E-01 |                    | 1.30E-04       |
| rs7943721  | 11:73309393     | G/A   | 0.17                       | 0.021 | 0.003 | 3.58E-10 |                                  |           |      |        |       |          | NA in Courage-PD   |                |
| rs7969559  | 12:69655167     | A/G   | 0.29                       | 0.017 | 0.003 | 1.53E-09 | 23                               | 3982      | 0.30 | 0.058  | 0.056 | 3.06E-01 |                    | 1.18E-04       |
| rs8005334  | 14:79563654     | G/T   | 0.36                       | 0.017 | 0.003 | 3.44E-10 | 23                               | 3982      | 0.35 | -0.023 | 0.053 | 6.65E-01 |                    | 1.28E-04       |
| rs80054503 | 1:72900406      | T/C   | 0.88                       | 0.024 | 0.004 | 3.10E-09 |                                  |           |      |        |       |          | NA in Courage-PD   |                |
| rs8096225  | 18:36921851     | C/A   | 0.70                       | 0.016 | 0.003 | 2.63E-08 | 23                               | 3982      | 0.70 | 0.020  | 0.072 | 7.83E-01 |                    | 1.01E-04       |
| rs876793   | 1:237852083     | T/C   | 0.65                       | 0.018 | 0.003 | 5.69E-11 | 23                               | 3982      | 0.66 | -0.003 | 0.053 | 9.48E-01 |                    | 1.46E-04       |
| rs9288999  | 3:114147927     | A/G   | 0.74                       | 0.017 | 0.003 | 1.50E-09 | 23                               | 3982      | 0.74 | -0.053 | 0.059 | 3.74E-01 |                    | 1.18E-04       |
| rs9302604  | 16:69576894     | G/A   | 0.44                       | 0.019 | 0.003 | 3.29E-13 | 23                               | 3982      | 0.42 | -0.054 | 0.052 | 3.02E-01 |                    | 1.72E-04       |
| rs9323328* | 14:58653514     | A/G   | 0.46                       | 0.014 | 0.003 | 2.55E-08 | 23                               | 3982      | 0.45 | 0.043  | 0.051 | 3.92E-01 |                    | 1.01E-04       |
| rs9423279  | 10:125680419    | C/G   | 0.36                       | 0.019 | 0.003 | 3.06E-12 | 1                                | 307       |      |        |       |          | Excluded for MR    |                |
| rs951740   | 1:44011737      | A/G   | 0.62                       | 0.030 | 0.003 | 3.82E-29 | 23                               | 3982      | 0.62 | -0.059 | 0.053 | 2.58E-01 |                    | 4.09E-04       |
| rs9540731* | 13:66949370     | C/T   | 0.49                       | 0.018 | 0.003 | 3.42E-12 | 24                               | 3997      | 0.49 | -0.019 | 0.055 | 7.25E-01 |                    | 1.57E-04       |
| rs9545155  | 13:80191873     | T/C   | 0.52                       | 0.016 | 0.003 | 3.04E-10 | 23                               | 3982      | 0.52 | 0.039  | 0.052 | 4.51E-01 |                    | 1.29E-04       |
| rs9826984  | 3:131945722     | G/A   | 0.46                       | 0.014 | 0.003 | 3.87E-08 | 23                               | 3982      | 0.45 | 0.025  | 0.051 | 6.29E-01 |                    | 9.80E-05       |
| rs9922607  | 16:17570220     | C/T   | 0.80                       | 0.022 | 0.003 | 3.42E-12 | 23                               | 3982      | 0.80 | 0.066  | 0.086 | 4.44E-01 |                    | 1.57E-04       |
| rs9941217  | 16:18050926     | C/G   | 0.65                       | 0.019 | 0.003 | 3.50E-12 | 23                               | 3982      | 0.66 | 0.041  | 0.071 | 5.60E-01 |                    | 1.57E-04       |

MR estimates stratified by HLA-DRB1 are based on SNP-smoking and SNP-PD associations from this table; samples from the Elbaz study were excluded for analyses in Courage-PD.

GSCAN, GWAS and Sequencing Consortium of Alcohol and Nicotine use.

NA, not available; EA/BA, effect allele/base allele; EAF, effect allele frequency; SE, standard error.

R<sup>2</sup> is the proportion of the variance of the exposure explained by the genetic variant according to the formula:  $2 \times \text{Betaexposure}^2 \times \text{EAFexposure} \times (1 - \text{EAFexposure})$ .

\*SNPs genotyped.

†Proxy used in Courage-PD: rs117495226.



**Supplementary table 3 SNPs in the HLA region associated with Parkinson's disease**

| <b>SNP</b> | <b>Position</b> | <b>EA</b> | <b>OA</b> | <b>EAF</b> | <b>N studies</b> | <b>OR (95% CI)</b> | <b>FDR q-value</b>   |
|------------|-----------------|-----------|-----------|------------|------------------|--------------------|----------------------|
| rs35265698 | 32561334        | G         | C         | 0.139      | 26               | 0.86 (0.81-0.92)   | 5.8×10 <sup>-3</sup> |
| rs2760985  | 32566398        | A         | G         | 0.133      | 26               | 0.86 (0.80-0.91)   | 5.8×10 <sup>-3</sup> |
| rs687308   | 32567256        | T         | C         | 0.134      | 26               | 0.86 (0.80-0.91)   | 5.8×10 <sup>-3</sup> |
| rs601945   | 32573415        | G         | A         | 0.134      | 26               | 0.85 (0.80-0.91)   | 5.8×10 <sup>-3</sup> |
| rs560530   | 32577222        | A         | G         | 0.151      | 26               | 0.86 (0.81-0.92)   | 5.8×10 <sup>-3</sup> |
| rs532965   | 32577973        | G         | T         | 0.136      | 26               | 0.86 (0.80-0.91)   | 5.8×10 <sup>-3</sup> |
| rs504594   | 32578772        | A         | C         | 0.133      | 26               | 0.86 (0.80-0.91)   | 5.8×10 <sup>-3</sup> |
| rs3997872  | 32580617        | A         | T         | 0.134      | 26               | 0.86 (0.81-0.92)   | 5.8×10 <sup>-3</sup> |
| rs3129751  | 32582189        | C         | A         | 0.134      | 26               | 0.86 (0.80-0.91)   | 5.8×10 <sup>-3</sup> |
| rs3104413  | 32582650        | G         | C         | 0.137      | 25               | 0.85 (0.79-0.91)   | 5.8×10 <sup>-3</sup> |
| rs6931277  | 32583357        | T         | A         | 0.151      | 21               | 0.84 (0.78-0.90)   | 5.8×10 <sup>-3</sup> |
| rs9271608  | 32591588        | G         | A         | 0.151      | 21               | 0.83 (0.78-0.90)   | 5.8×10 <sup>-3</sup> |
| rs9268543  | 32384801        | T         | A         | 0.131      | 26               | 0.86 (0.81-0.92)   | 8.8×10 <sup>-3</sup> |
| rs510205   | 32584693        | G         | C         | 0.168      | 24               | 0.87 (0.82-0.92)   | 8.8×10 <sup>-3</sup> |
| rs3997868  | 32578590        | G         | A         | 0.164      | 26               | 0.88 (0.83-0.93)   | 0.01                 |
| rs660895   | 32577380        | G         | A         | 0.172      | 26               | 0.88 (0.84-0.93)   | 0.02                 |
| rs521539   | 32581973        | A         | G         | 0.168      | 26               | 0.88 (0.83-0.93)   | 0.02                 |
| rs2395175  | 32405026        | A         | G         | 0.132      | 26               | 0.87 (0.81-0.93)   | 0.03                 |
| rs3997869  | 32578632        | T         | C         | 0.233      | 26               | 0.90 (0.85-0.94)   | 0.03                 |

EA, effect allele. OA, other allele. EAF, effect allele frequency in controls. OR, odds ratio. CI, confidence interval. FDR, false discovery rate. ORs are computed under an additive model. SNPs are ordered by increasing q-value and position. All SNPs were all located near HLA class II genes, 17 near *HLA-DRB1* and two (rs9268543, rs2395175) near *HLA-DRA*.

**Supplementary table 4 Association of alleles of HLA class II genes and and HLA-DRBI~HLA-DQBI haplotypes with Parkinson's disease**

| Allele/haplotype      | N studies | N controls + | N cases +   | F <sub>controls</sub> | F <sub>cases</sub> | OR (95% CI)             | FDR q-value                |
|-----------------------|-----------|--------------|-------------|-----------------------|--------------------|-------------------------|----------------------------|
| <b>HLA alleles</b>    |           |              |             |                       |                    |                         |                            |
| HLA-DPBI*01:01        | 26        | 854          | 1123        | 0.045                 | 0.046              | 1.00 (0.91-1.11)        | 0.96                       |
| HLA-DPBI*02:01        | 26        | 2371         | 3172        | 0.140                 | 0.144              | 1.02 (0.96-1.09)        | 0.55                       |
| HLA-DPBI*03:01        | 26        | 1652         | 2060        | 0.090                 | 0.086              | 0.96 (0.89-1.03)        | 0.31                       |
| HLA-DPBI*04:01        | 26        | 6173         | 8068        | 0.437                 | 0.434              | 1.02 (0.96-1.08)        | 0.57                       |
| HLA-DPBI*04:02        | 26        | 2125         | 2839        | 0.123                 | 0.127              | 1.01 (0.95-1.09)        | 0.70                       |
| HLA-DPBI*05:01        | 24        | 367          | 456         | 0.019                 | 0.018              | 0.97 (0.84-1.13)        | 0.69                       |
| HLA-DPBI*09:01        | 20        | 120          | 137         | 0.006                 | 0.005              | 0.78 (0.60-1.01)        | 0.12                       |
| HLA-DPBI*10:01        | 26        | 389          | 467         | 0.019                 | 0.017              | 0.86 (0.75-1.00)        | 0.12                       |
| HLA-DPBI*11:01        | 22        | 359          | 494         | 0.018                 | 0.022              | 1.04 (0.89-1.21)        | 0.63                       |
| HLA-DPBI*13:01        | 25        | 405          | 487         | 0.020                 | 0.019              | 0.87 (0.75-1.00)        | 0.12                       |
| HLA-DPBI*14:01        | 23        | 269          | 348         | 0.013                 | 0.014              | 1.05 (0.88-1.24)        | 0.61                       |
| HLA-DPBI*15:01        | 24        | 127          | 169         | 0.006                 | 0.006              | 1.09 (0.85-1.39)        | 0.51                       |
| HLA-DPBI*16:01        | 20        | 106          | 121         | 0.005                 | 0.005              | 0.91 (0.69-1.21)        | 0.52                       |
| HLA-DPBI*17:01        | 25        | 268          | 424         | 0.012                 | 0.016              | 1.12 (0.95-1.32)        | 0.26                       |
| HLA-DPBI*19:01        | 23        | 125          | 148         | 0.006                 | 0.005              | 0.94 (0.73-1.22)        | 0.65                       |
| HLA-DPBI*104:01       | 26        | 355          | 446         | 0.017                 | 0.018              | 0.93 (0.80-1.08)        | 0.33                       |
| HLA-DQAI*01:01        | 26        | 1782         | 2470        | 0.101                 | 0.105              | 1.07 (1.00-1.15)        | 0.12                       |
| HLA-DQAI*01:02        | 26        | 3364         | 4411        | 0.199                 | 0.206              | 1.04 (0.98-1.10)        | 0.27                       |
| HLA-DQAI*01:03        | 26        | 1363         | 1766        | 0.075                 | 0.075              | 0.98 (0.90-1.06)        | 0.60                       |
| HLA-DQAI*01:04        | 26        | 670          | 828         | 0.032                 | 0.032              | 0.95 (0.85-1.06)        | 0.37                       |
| HLA-DQAI*01:05        | 25        | 188          | 204         | 0.009                 | 0.007              | 0.79 (0.64-0.98)        | 0.10                       |
| HLA-DQAI*02:01        | 26        | 2158         | 3003        | 0.122                 | 0.126              | 1.00 (0.94-1.07)        | 0.91                       |
| <b>HLA-DQAI*03:01</b> | <b>26</b> | <b>1567</b>  | <b>1774</b> | <b>0.089</b>          | <b>0.076</b>       | <b>0.86 (0.80-0.93)</b> | <b>7.7×10<sup>-3</sup></b> |
| HLA-DQAI*03:02        | 18        | 162          | 212         | 0.009                 | 0.008              | 1.05 (0.84-1.31)        | 0.66                       |
| <b>HLA-DQAI*03:03</b> | <b>25</b> | <b>924</b>   | <b>1061</b> | <b>0.050</b>          | <b>0.042</b>       | <b>0.86 (0.78-0.95)</b> | <b>0.02</b>                |
| HLA-DQAI*04:01        | 26        | 556          | 713         | 0.028                 | 0.027              | 1.01 (0.90-1.15)        | 0.82                       |
| HLA-DQAI*05:01        | 26        | 1922         | 2580        | 0.107                 | 0.109              | 1.02 (0.95-1.10)        | 0.52                       |
| HLA-DQAI*05:05        | 26        | 2663         | 3660        | 0.158                 | 0.165              | 1.05 (0.98-1.12)        | 0.26                       |
| HLA-DQBI:02:01        | 26        | 1923         | 2583        | 0.106                 | 0.109              | 1.02 (0.95-1.10)        | 0.51                       |
| HLA-DQBI:02:02        | 26        | 1688         | 2317        | 0.093                 | 0.095              | 0.98 (0.91-1.05)        | 0.53                       |
| HLA-DQBI:03:01        | 26        | 3481         | 4574        | 0.208                 | 0.206              | 0.98 (0.92-1.04)        | 0.53                       |
| <b>HLA-DQBI:03:02</b> | <b>26</b> | <b>1642</b>  | <b>1905</b> | <b>0.093</b>          | <b>0.082</b>       | <b>0.87 (0.81-0.94)</b> | <b>7.7×10<sup>-3</sup></b> |
| HLA-DQBI:03:03        | 26        | 681          | 976         | 0.036                 | 0.038              | 1.09 (0.98-1.21)        | 0.22                       |
| HLA-DQBI:04:02        | 26        | 585          | 756         | 0.030                 | 0.029              | 1.01 (0.89-1.14)        | 0.90                       |
| HLA-DQBI:05:01        | 26        | 1995         | 2716        | 0.113                 | 0.116              | 1.04 (0.97-1.12)        | 0.29                       |
| HLA-DQBI:05:02        | 24        | 582          | 781         | 0.029                 | 0.032              | 1.07 (0.95-1.21)        | 0.29                       |
| HLA-DQBI:05:03        | 26        | 679          | 838         | 0.032                 | 0.033              | 0.95 (0.85-1.06)        | 0.38                       |
| HLA-DQBI:06:01        | 21        | 137          | 198         | 0.007                 | 0.008              | 1.05 (0.83-1.33)        | 0.68                       |
| HLA-DQBI:06:02        | 26        | 2020         | 2652        | 0.109                 | 0.116              | 1.03 (0.96-1.10)        | 0.44                       |
| HLA-DQBI:06:03        | 26        | 1286         | 1660        | 0.070                 | 0.069              | 0.98 (0.90-1.06)        | 0.62                       |
| HLA-DQBI:06:04        | 26        | 678          | 897         | 0.035                 | 0.036              | 1.06 (0.95-1.18)        | 0.33                       |
| HLA-DQBI:06:09        | 21        | 178          | 207         | 0.009                 | 0.008              | 0.90 (0.72-1.11)        | 0.33                       |
| HLA-DRBI*01:01        | 26        | 1427         | 1948        | 0.083                 | 0.087              | 1.08 (0.99-1.17)        | 0.13                       |
| HLA-DRBI*01:02        | 26        | 251          | 389         | 0.012                 | 0.016              | 1.03 (0.87-1.23)        | 0.73                       |

| Allele/haplotype                    | N studies | N controls + | N cases +   | F <sub>controls</sub> | F <sub>cases</sub> | OR (95% CI)             | FDR q-value                |
|-------------------------------------|-----------|--------------|-------------|-----------------------|--------------------|-------------------------|----------------------------|
| HLA-DRB1*03:01                      | 26        | 1877         | 2524        | 0.113                 | 0.115              | 1.02 (0.95-1.10)        | 0.61                       |
| <b>HLA-DRB1*04:01</b>               | <b>26</b> | <b>1210</b>  | <b>1400</b> | <b>0.069</b>          | <b>0.06</b>        | <b>0.88 (0.81-0.97)</b> | <b>0.04</b>                |
| HLA-DRB1*04:02                      | 24        | 163          | 193         | 0.008                 | 0.008              | 0.78 (0.62-0.98)        | 0.10                       |
| <b>HLA-DRB1*04:04</b>               | <b>26</b> | <b>452</b>   | <b>459</b>  | <b>0.026</b>          | <b>0.020</b>       | <b>0.80 (0.70-0.93)</b> | <b>0.02</b>                |
| HLA-DRB1*04:05                      | 20        | 98           | 172         | 0.005                 | 0.007              | 1.23 (0.94-1.61)        | 0.22                       |
| HLA-DRB1*04:07                      | 22        | 126          | 121         | 0.007                 | 0.004              | 0.73 (0.56-0.96)        | 0.10                       |
| HLA-DRB1*07:01                      | 26        | 2095         | 2923        | 0.128                 | 0.132              | 1.00 (0.94-1.07)        | 0.94                       |
| HLA-DRB1*08:01                      | 25        | 497          | 636         | 0.028                 | 0.026              | 1.01 (0.89-1.15)        | 0.87                       |
| HLA-DRB1*09:01                      | 18        | 148          | 196         | 0.009                 | 0.008              | 1.05 (0.84-1.32)        | 0.66                       |
| HLA-DRB1*10:01                      | 25        | 206          | 224         | 0.011                 | 0.009              | 0.80 (0.65-0.98)        | 0.10                       |
| HLA-DRB1*11:01                      | 26        | 1374         | 1958        | 0.079                 | 0.084              | 1.08 (1.00-1.18)        | 0.12                       |
| HLA-DRB1*11:04                      | 26        | 429          | 581         | 0.021                 | 0.025              | 1.02 (0.89-1.17)        | 0.76                       |
| HLA-DRB1*12:01                      | 24        | 282          | 389         | 0.016                 | 0.016              | 1.08 (0.91-1.27)        | 0.39                       |
| HLA-DRB1*13:01                      | 26        | 1181         | 1532        | 0.069                 | 0.068              | 0.98 (0.09-1.07)        | 0.73                       |
| HLA-DRB1*13:02                      | 26        | 847          | 1070        | 0.049                 | 0.047              | 0.99 (0.89-1.09)        | 0.79                       |
| HLA-DRB1*13:03                      | 25        | 190          | 265         | 0.010                 | 0.011              | 0.97 (0.79-1.19)        | 0.77                       |
| HLA-DRB1*14:01                      | 26        | 641          | 803         | 0.033                 | 0.034              | 0.96 (0.85-1.08)        | 0.48                       |
| HLA-DRB1*15:01                      | 26        | 2066         | 2764        | 0.124                 | 0.132              | 1.04 (0.97-1.12)        | 0.29                       |
| HLA-DRB1*15:02                      | 21        | 132          | 191         | 0.007                 | 0.008              | 1.06 (0.84-1.34)        | 0.64                       |
| HLA-DRB1*16:01                      | 24        | 457          | 620         | 0.023                 | 0.027              | 1.09 (0.95-1.24)        | 0.29                       |
| <b>HLA-DRB1~HLA-DQB1 haplotypes</b> |           |              |             |                       |                    |                         |                            |
| 01:01~05:01                         | 26        | 1263         | 1714        | 0.082                 | 0.085              | 1.08 (0.99-1.17)        | 0.08                       |
| 01:02~05:01                         | 26        | 235          | 358         | 0.013                 | 0.017              | 1.05 (0.88-1.25)        | 0.58                       |
| 03:01~02:01                         | 26        | 1781         | 2356        | 0.116                 | 0.118              | 1.02 (0.95-1.10)        | 0.54                       |
| <b>04:01~03:01</b>                  | <b>23</b> | <b>490</b>   | <b>557</b>  | <b>0.031</b>          | <b>0.025</b>       | <b>0.86 (0.75-0.98)</b> | <b>0.03</b>                |
| 04:01~03:02                         | 24        | 676          | 776         | 0.044                 | 0.035              | 0.91 (0.81-1.02)        | 0.10                       |
| <b>04:02~03:02</b>                  | <b>24</b> | <b>140</b>   | <b>165</b>  | <b>0.009</b>          | <b>0.008</b>       | <b>0.76 (0.61-0.96)</b> | <b>0.02</b>                |
| <b>04:04~03:02</b>                  | <b>26</b> | <b>423</b>   | <b>426</b>  | <b>0.027</b>          | <b>0.020</b>       | <b>0.81 (0.70-0.94)</b> | <b>5.8×10<sup>-3</sup></b> |
| <b>04:07~03:01</b>                  | <b>22</b> | <b>122</b>   | <b>117</b>  | <b>0.007</b>          | <b>0.005</b>       | <b>0.73 (0.56-0.96)</b> | <b>0.02</b>                |
| 07:01~02:01                         | 26        | 1511         | 2031        | 0.099                 | 0.100              | 0.95 (0.88-1.03)        | 0.21                       |
| 07:01~03:03                         | 26        | 471          | 701         | 0.029                 | 0.033              | 1.10 (0.97-1.25)        | 0.14                       |
| 08:01~04:02                         | 25        | 437          | 563         | 0.027                 | 0.025              | 1.01 (0.89-1.16)        | 0.84                       |
| 09:01~03:03                         | 18        | 128          | 172         | 0.008                 | 0.008              | 1.03 (0.81-1.32)        | 0.78                       |
| 10:01~05:01                         | 24        | 181          | 198         | 0.011                 | 0.009              | 0.84 (0.68-1.04)        | 0.11                       |
| 11:01~03:01                         | 26        | 1160         | 1656        | 0.076                 | 0.079              | 1.06 (0.97-1.15)        | 0.19                       |
| 11:04~03:01                         | 26        | 373          | 507         | 0.021                 | 0.025              | 1.02 (0.88-1.18)        | 0.78                       |
| 12:01~03:01                         | 24        | 242          | 342         | 0.015                 | 0.016              | 1.13 (0.95-1.35)        | 0.16                       |
| 13:01~06:03                         | 26        | 1026         | 1290        | 0.065                 | 0.064              | 0.97 (0.89-1.07)        | 0.55                       |
| 13:02~06:04                         | 26        | 592          | 778         | 0.037                 | 0.038              | 1.06 (0.94-1.19)        | 0.31                       |
| 13:02~06:09                         | 21        | 151          | 185         | 0.009                 | 0.008              | 0.95 (0.76-1.19)        | 0.65                       |
| 13:03~03:01                         | 25        | 176          | 237         | 0.010                 | 0.011              | 0.96 (0.78-1.18)        | 0.68                       |
| 14:01~05:03                         | 26        | 542          | 675         | 0.032                 | 0.034              | 0.96 (0.85-1.09)        | 0.56                       |
| 15:01~06:02                         | 26        | 1814         | 2414        | 0.114                 | 0.123              | 1.04 (0.97-1.12)        | 0.29                       |
| 15:02~06:01                         | 21        | 128          | 175         | 0.008                 | 0.008              | 1.04 (0.82-1.32)        | 0.76                       |
| 16:01~05:02                         | 24        | 377          | 521         | 0.021                 | 0.026              | 1.09 (0.94-1.26)        | 0.24                       |

F<sub>controls</sub>, pooled frequency of allele in controls; F<sub>cases</sub>, pooled frequency of allele in cases.

Odds ratios (OR) and 95% confidence intervals (CI) are computed under a dominant model adjusted for sex, study, and four principal components. Significant alleles and haplotypes are highlighted in bold characters.

**Supplementary table 5 Association between amino acids in the HLA class II region and Parkinson's disease**

| <b>Amino acid</b> | <b>N studies</b> | <b>N controls +</b> | <b>N cases +</b> | <b>F<sub>controls</sub></b> | <b>F<sub>cases</sub></b> | <b>OR (95% CI)</b> | <b>FDR q-value</b> |
|-------------------|------------------|---------------------|------------------|-----------------------------|--------------------------|--------------------|--------------------|
| DQBI_-24_A        | 26               | 7495                | 9842             | 0.814                       | 0.810                    | 0.99 (0.84-1.17)   | 0.93               |
| DQBI_-24_S        | 26               | 2571                | 3439             | 0.184                       | 0.189                    | 1.04 (0.98-1.12)   | 0.29               |
| DQBI_-18_D        | 26               | 5258                | 6930             | 0.429                       | 0.435                    | 1.06 (0.99-1.14)   | 0.19               |
| DQBI_-18_G        | 26               | 6340                | 8326             | 0.570                       | 0.564                    | 0.97 (0.89-1.05)   | 0.41               |
| DQBI_-15_A        | 26               | 5039                | 6729             | 0.410                       | 0.415                    | 1.01 (0.94-1.07)   | 0.88               |
| DQBI_-15_V        | 26               | 6436                | 8427             | 0.589                       | 0.584                    | 1.05 (0.97-1.14)   | 0.31               |
| DQBI_-14_P        | 22               | 129                 | 175              | 0.008                       | 0.008                    | 0.98 (0.77-1.25)   | 0.88               |
| DQBI_-7_A         | 26               | 7382                | 9736             | 0.780                       | 0.776                    | 1.13 (0.98-1.30)   | 0.19               |
| DQBI_-7_S         | 26               | 3083                | 4172             | 0.219                       | 0.223                    | 1.01 (0.95-1.08)   | 0.72               |
| DQBI_-6_I         | 26               | 2571                | 3439             | 0.184                       | 0.189                    | 1.04 (0.98-1.12)   | 0.29               |
| DQBI_-6_M         | 26               | 7495                | 9842             | 0.814                       | 0.810                    | 0.99 (0.84-1.17)   | 0.93               |
| DQBI_-3_S         | 26               | 5258                | 6930             | 0.429                       | 0.435                    | 1.06 (0.99-1.14)   | 0.19               |
| DQBI_-3_T         | 26               | 6340                | 8326             | 0.570                       | 0.564                    | 0.97 (0.89-1.05)   | 0.41               |
| DQBI_-2_L         | 26               | 3318                | 4363             | 0.238                       | 0.244                    | 1.04 (0.97-1.11)   | 0.31               |
| DQBI_-2_P         | 26               | 6340                | 8326             | 0.570                       | 0.564                    | 0.97 (0.89-1.05)   | 0.41               |
| DQBI_-2_S         | 26               | 2571                | 3439             | 0.184                       | 0.189                    | 1.04 (0.98-1.12)   | 0.29               |
| DQBI_-1_L         | 26               | 5258                | 6930             | 0.429                       | 0.435                    | 1.06 (0.99-1.14)   | 0.19               |
| DQBI_-1_V         | 26               | 6340                | 8326             | 0.570                       | 0.564                    | 0.97 (0.89-1.05)   | 0.41               |
| DQBI_6_P          | 22               | 129                 | 175              | 0.008                       | 0.008                    | 0.98 (0.77-1.25)   | 0.88               |
| DQBI_12_F         | 26               | 2234                | 2959             | 0.146                       | 0.154                    | 1.05 (0.97-1.12)   | 0.29               |
| DQBI_12_L         | 22               | 129                 | 175              | 0.008                       | 0.008                    | 0.98 (0.77-1.25)   | 0.88               |
| DQBI_12_Y         | 26               | 7596                | 9947             | 0.844                       | 0.836                    | 0.86 (0.70-1.04)   | 0.22               |
| DQBI_16_A         | 26               | 2671                | 3526             | 0.189                       | 0.191                    | 0.98 (0.92-1.05)   | 0.57               |
| DQBI_16_G         | 26               | 7553                | 9884             | 0.811                       | 0.809                    | 0.95 (0.8-1.14)    | 0.61               |
| DQBI_17_L         | 26               | 2571                | 3439             | 0.184                       | 0.189                    | 1.04 (0.98-1.12)   | 0.29               |
| DQBI_17_M         | 26               | 7499                | 9845             | 0.816                       | 0.811                    | 0.98 (0.84-1.16)   | 0.85               |
| DQBI_29_G         | 26               | 2966                | 3939             | 0.216                       | 0.219                    | 1.04 (0.97-1.11)   | 0.31               |
| DQBI_29_L         | 26               | 6473                | 8476             | 0.589                       | 0.587                    | 0.98 (0.90-1.07)   | 0.63               |
| DQBI_29_Y         | 26               | 2671                | 3526             | 0.189                       | 0.191                    | 0.98 (0.92-1.05)   | 0.57               |
| DQBI_31_S         | 26               | 3083                | 4172             | 0.219                       | 0.223                    | 1.01 (0.95-1.08)   | 0.72               |
| DQBI_31_T         | 26               | 7384                | 9738             | 0.781                       | 0.777                    | 1.13 (0.98-1.31)   | 0.19               |
| DQBI_33_H         | 26               | 3891                | 5114             | 0.296                       | 0.298                    | 1.03 (0.97-1.10)   | 0.35               |
| DQBI_33_S         | 26               | 3083                | 4172             | 0.219                       | 0.223                    | 1.01 (0.95-1.08)   | 0.72               |
| DQBI_33_Y         | 26               | 5695                | 7483             | 0.482                       | 0.476                    | 1.00 (0.93-1.07)   | 0.97               |
| DQBI_40_D         | 22               | 129                 | 175              | 0.008                       | 0.008                    | 0.98 (0.77-1.25)   | 0.88               |
| DQBI_40_I         | 26               | 3083                | 4172             | 0.219                       | 0.223                    | 1.01 (0.95-1.08)   | 0.72               |
| DQBI_40_Y         | 26               | 7354                | 9693             | 0.772                       | 0.767                    | 1.12 (0.97-1.28)   | 0.22               |
| DQBI_41_A         | 26               | 6409                | 8411             | 0.584                       | 0.576                    | 1.01 (0.93-1.09)   | 0.84               |
| DQBI_41_V         | 26               | 5107                | 6851             | 0.416                       | 0.424                    | 1.03 (0.97-1.11)   | 0.33               |
| DQBI_48_E         | 26               | 2573                | 3392             | 0.180                       | 0.181                    | 0.98 (0.92-1.05)   | 0.55               |
| DQBI_48_G         | 26               | 7585                | 9925             | 0.820                       | 0.819                    | 0.93 (0.77-1.12)   | 0.44               |
| DQBI_49_E         | 26               | 3083                | 4172             | 0.219                       | 0.223                    | 1.01 (0.95-1.08)   | 0.72               |
| DQBI_49_V         | 26               | 7384                | 9738             | 0.781                       | 0.777                    | 1.13 (0.98-1.31)   | 0.19               |
| DQBI_50_F         | 26               | 3083                | 4172             | 0.219                       | 0.223                    | 1.01 (0.95-1.08)   | 0.72               |
| DQBI_50_Y         | 26               | 7384                | 9738             | 0.781                       | 0.777                    | 1.13 (0.98-1.31)   | 0.19               |
| DQBI_55_L         | 26               | 3083                | 4172             | 0.219                       | 0.223                    | 1.01 (0.95-1.08)   | 0.72               |
| DQBI_55_P         | 26               | 7384                | 9738             | 0.781                       | 0.777                    | 1.13 (0.98-1.31)   | 0.19               |

| <b>Amino acid</b> | <b>N studies</b> | <b>N controls +</b> | <b>N cases +</b> | <b>F<sub>controls</sub></b> | <b>F<sub>cases</sub></b> | <b>OR (95% CI)</b> | <b>FDR q-value</b> |
|-------------------|------------------|---------------------|------------------|-----------------------------|--------------------------|--------------------|--------------------|
| DQBI_56_L         | 26               | 6292                | 8261             | 0.562                       | 0.556                    | 0.97 (0.89-1.05)   | 0.40               |
| DQBI_56_Q         | 26               | 5332                | 7032             | 0.438                       | 0.444                    | 1.06 (0.99-1.14)   | 0.19               |
| DQBI_58_L         | 26               | 3083                | 4172             | 0.219                       | 0.223                    | 1.01 (0.95-1.08)   | 0.72               |
| DQBI_58_P         | 26               | 4082                | 5269             | 0.308                       | 0.299                    | 0.95 (0.89-1.01)   | 0.19               |
| DQBI_58_R         | 26               | 5606                | 7362             | 0.469                       | 0.475                    | 1.06 (0.99-1.13)   | 0.22               |
| DQBI_59_L         | 26               | 472                 | 615              | 0.029                       | 0.028                    | 1.02 (0.89-1.16)   | 0.78               |
| DQBI_59_P         | 26               | 7788                | 10221            | 0.971                       | 0.972                    | 0.98 (0.41-2.35)   | 0.96               |
| DQBI_60_A         | 26               | 4112                | 5283             | 0.311                       | 0.301                    | 0.93 (0.88-1.00)   | 0.17               |
| DQBI_60_D         | 26               | 5767                | 7638             | 0.486                       | 0.492                    | 1.03 (0.96-1.11)   | 0.40               |
| DQBI_60_S         | 25               | 475                 | 646              | 0.026                       | 0.033                    | 1.08 (0.94-1.23)   | 0.31               |
| DQBI_60_V         | 26               | 2356                | 3158             | 0.165                       | 0.168                    | 1.05 (0.98-1.12)   | 0.26               |
| DQBI_69_D         | 26               | 3569                | 4785             | 0.261                       | 0.264                    | 1.00 (0.94-1.07)   | 0.90               |
| DQBI_69_E         | 26               | 7238                | 9524             | 0.739                       | 0.736                    | 1.07 (0.95-1.21)   | 0.31               |
| DQBI_70_I         | 26               | 3569                | 4785             | 0.261                       | 0.264                    | 1.00 (0.94-1.07)   | 0.90               |
| DQBI_70_V         | 26               | 7238                | 9524             | 0.739                       | 0.736                    | 1.07 (0.95-1.21)   | 0.31               |
| DQBI_73_E         | 26               | 493                 | 636              | 0.030                       | 0.029                    | 1.00 (0.88-1.14)   | 0.97               |
| DQBI_73_G         | 26               | 4806                | 6343             | 0.378                       | 0.385                    | 1.05 (0.99-1.13)   | 0.20               |
| DQBI_73_R         | 26               | 6492                | 8491             | 0.590                       | 0.585                    | 0.96 (0.88-1.04)   | 0.33               |
| DQBI_74_A         | 26               | 2552                | 3424             | 0.183                       | 0.188                    | 1.05 (0.98-1.12)   | 0.26               |
| DQBI_74_D         | 26               | 493                 | 636              | 0.030                       | 0.029                    | 1.00 (0.88-1.14)   | 0.97               |
| DQBI_74_K         | 26               | 3083                | 4172             | 0.219                       | 0.223                    | 1.01 (0.95-1.08)   | 0.72               |
| DQBI_74_T         | 26               | 6288                | 8214             | 0.562                       | 0.556                    | 0.98 (0.91-1.06)   | 0.67               |
| DQBI_77_A         | 26               | 3083                | 4172             | 0.219                       | 0.223                    | 1.01 (0.95-1.08)   | 0.72               |
| DQBI_77_E         | 26               | 6288                | 8214             | 0.562                       | 0.556                    | 0.98 (0.91-1.06)   | 0.67               |
| DQBI_77_S         | 26               | 2966                | 3939             | 0.216                       | 0.219                    | 1.04 (0.97-1.11)   | 0.31               |
| DQBI_78_L         | 26               | 6288                | 8214             | 0.562                       | 0.556                    | 0.98 (0.91-1.06)   | 0.67               |
| DQBI_78_V         | 26               | 5337                | 7110             | 0.438                       | 0.444                    | 1.02 (0.96-1.10)   | 0.48               |
| DQBI_80_R         | 26               | 5039                | 6751             | 0.407                       | 0.414                    | 1.03 (0.97-1.10)   | 0.34               |
| DQBI_80_T         | 26               | 6471                | 8486             | 0.593                       | 0.586                    | 1.00 (0.92-1.09)   | 0.92               |
| DQBI_87_E         | 26               | 5332                | 7032             | 0.438                       | 0.444                    | 1.06 (0.99-1.14)   | 0.19               |
| DQBI_87_Q         | 26               | 6292                | 8261             | 0.562                       | 0.556                    | 0.97 (0.89-1.05)   | 0.40               |
| DQBI_88_L         | 26               | 6292                | 8261             | 0.562                       | 0.556                    | 0.97 (0.89-1.05)   | 0.40               |
| DQBI_88_V         | 26               | 5332                | 7032             | 0.438                       | 0.444                    | 1.06 (0.99-1.14)   | 0.19               |
| DQBI_89_A         | 26               | 4901                | 6474             | 0.388                       | 0.395                    | 1.05 (0.99-1.12)   | 0.21               |
| DQBI_89_E         | 26               | 6292                | 8261             | 0.562                       | 0.556                    | 0.97 (0.89-1.05)   | 0.40               |
| DQBI_89_G         | 26               | 748                 | 957              | 0.047                       | 0.047                    | 1.02 (0.92-1.14)   | 0.67               |
| DQBI_90_F         | 26               | 2854                | 3754             | 0.197                       | 0.204                    | 1.03 (0.96-1.10)   | 0.42               |
| DQBI_90_L         | 26               | 6292                | 8261             | 0.562                       | 0.556                    | 0.97 (0.89-1.05)   | 0.40               |
| DQBI_90_Y         | 26               | 3180                | 4213             | 0.235                       | 0.239                    | 1.05 (0.98-1.11)   | 0.29               |
| DQBI_92_G         | 26               | 5332                | 7032             | 0.438                       | 0.444                    | 1.06 (0.99-1.14)   | 0.19               |
| DQBI_92_T         | 26               | 6292                | 8261             | 0.562                       | 0.556                    | 0.97 (0.89-1.05)   | 0.40               |
| DQBI_93_I         | 26               | 5332                | 7032             | 0.438                       | 0.444                    | 1.06 (0.99-1.14)   | 0.19               |
| DQBI_93_T         | 26               | 6292                | 8261             | 0.562                       | 0.556                    | 0.97 (0.89-1.05)   | 0.40               |
| DQBI_119_I        | 26               | 2571                | 3439             | 0.184                       | 0.189                    | 1.04 (0.98-1.12)   | 0.29               |
| DQBI_119_V        | 26               | 7499                | 9845             | 0.816                       | 0.811                    | 0.98 (0.84-1.16)   | 0.85               |
| DQBI_128_A        | 26               | 6292                | 8261             | 0.562                       | 0.556                    | 0.97 (0.89-1.05)   | 0.40               |
| DQBI_128_G        | 26               | 3424                | 4495             | 0.248                       | 0.254                    | 1.03 (0.97-1.10)   | 0.33               |
| DQBI_128_S        | 26               | 2571                | 3439             | 0.184                       | 0.189                    | 1.04 (0.98-1.12)   | 0.29               |
| DQBI_129_H        | 25               | 475                 | 646              | 0.026                       | 0.033                    | 1.08 (0.94-1.23)   | 0.31               |
| DQBI_129_Q        | 25               | 7778                | 10212            | 0.974                       | 0.967                    | 0.85 (0.45-1.59)   | 0.60               |
| DQBI_133_Q        | 26               | 748                 | 957              | 0.047                       | 0.047                    | 1.02 (0.92-1.14)   | 0.67               |

| Amino acid        | N studies | N controls + | N cases +   | F <sub>controls</sub> | F <sub>cases</sub> | OR (95% CI)             | FDR q-value                |
|-------------------|-----------|--------------|-------------|-----------------------|--------------------|-------------------------|----------------------------|
| DQBI_133_R        | 26        | 7780         | 10205       | 0.953                 | 0.953              | 0.67 (0.36-1.27)        | 0.29                       |
| DQBI_143_A        | 26        | 6922         | 9153        | 0.661                 | 0.670              | 1.07 (0.96-1.18)        | 0.29                       |
| DQBI_143_T        | 26        | 4386         | 5711        | 0.339                 | 0.330              | 0.96 (0.90-1.03)        | 0.31                       |
| DQBI_170_H        | 26        | 2671         | 3526        | 0.189                 | 0.191              | 0.98 (0.92-1.05)        | 0.57                       |
| DQBI_170_R        | 26        | 7553         | 9884        | 0.811                 | 0.809              | 0.95 (0.80-1.14)        | 0.61                       |
| DQBI_185_N        | 26        | 4386         | 5711        | 0.339                 | 0.330              | 0.96 (0.90-1.03)        | 0.31                       |
| DQBI_185_S        | 26        | 6922         | 9153        | 0.661                 | 0.670              | 1.07 (0.96-1.18)        | 0.29                       |
| DQBI_188_I        | 26        | 2241         | 2836        | 0.159                 | 0.146              | 0.96 (0.89-1.03)        | 0.29                       |
| DQBI_188_T        | 26        | 7562         | 9982        | 0.841                 | 0.854              | 1.17 (0.97-1.42)        | 0.20                       |
| DQBI_200_N        | 22        | 129          | 175         | 0.008                 | 0.008              | 0.98 (0.77-1.25)        | 0.88                       |
| DQBI_206_I        | 26        | 6340         | 8326        | 0.570                 | 0.564              | 0.97 (0.89-1.05)        | 0.41                       |
| DQBI_206_V        | 26        | 5258         | 6930        | 0.429                 | 0.435              | 1.06 (0.99-1.14)        | 0.19                       |
| DQBI_223_H        | 26        | 6284         | 8253        | 0.561                 | 0.555              | 0.97 (0.89-1.05)        | 0.41                       |
| DQBI_223_R        | 26        | 5332         | 7032        | 0.438                 | 0.444              | 1.06 (0.99-1.14)        | 0.19                       |
| DQBI_224_H        | 26        | 6284         | 8253        | 0.561                 | 0.555              | 0.97 (0.89-1.05)        | 0.43                       |
| DQBI_224_Q        | 26        | 5332         | 7032        | 0.438                 | 0.444              | 1.06 (0.99-1.14)        | 0.19                       |
| DQBI_227_Q        | 26        | 7495         | 9842        | 0.814                 | 0.810              | 0.99 (0.84-1.17)        | 0.93                       |
| DQBI_227_R        | 26        | 2571         | 3439        | 0.184                 | 0.189              | 1.04 (0.98-1.12)        | 0.29                       |
| DRBI_-25_K        | 26        | 6176         | 8075        | 0.545                 | 0.543              | 0.97 (0.90-1.05)        | 0.42                       |
| DRBI_-25_R        | 26        | 5447         | 7169        | 0.454                 | 0.457              | 1.01 (0.94-1.08)        | 0.88                       |
| <b>DRBI_-24_F</b> | <b>26</b> | <b>1892</b>  | <b>2159</b> | <b>0.128</b>          | <b>0.111</b>       | <b>0.84 (0.78-0.91)</b> | <b>1.4×10<sup>-4</sup></b> |
| DRBI_-24_L        | 26        | 7637         | 10087       | 0.871                 | 0.889              | 1.29 (1.02-1.64)        | 0.17                       |
| DRBI_-17_A        | 26        | 7203         | 9443        | 0.727                 | 0.715              | 0.94 (0.84-1.06)        | 0.33                       |
| <b>DRBI_-17_T</b> | <b>26</b> | <b>3667</b>  | <b>4995</b> | <b>0.273</b>          | <b>0.285</b>       | <b>1.10 (1.03-1.17)</b> | <b>0.03</b>                |
| DRBI_-16_A        | 26        | 6176         | 8075        | 0.545                 | 0.543              | 0.97 (0.90-1.05)        | 0.41                       |
| DRBI_-16_V        | 26        | 5447         | 7169        | 0.454                 | 0.457              | 1.01 (0.94-1.08)        | 0.88                       |
| DRBI_-I_A         | 26        | 7645         | 10031       | 0.867                 | 0.857              | 0.88 (0.70-1.10)        | 0.31                       |
| DRBI_-I_S         | 26        | 2012         | 2721        | 0.133                 | 0.143              | 1.07 (0.99-1.14)        | 0.19                       |
| DRBI_4_Q          | 26        | 2064         | 2827        | 0.139                 | 0.142              | 0.99 (0.93-1.07)        | 0.87                       |
| DRBI_4_R          | 26        | 7648         | 10019       | 0.861                 | 0.858              | 0.96 (0.77-1.21)        | 0.75                       |
| DRBI_9_E          | 26        | 6458         | 8354        | 0.585                 | 0.569              | 0.93 (0.85-1.01)        | 0.19                       |
| DRBI_9_W          | 26        | 5054         | 6846        | 0.407                 | 0.423              | 1.07 (1.01-1.15)        | 0.17                       |
| DRBI_10_E         | 24        | 182          | 198         | 0.011                 | 0.009              | 0.81 (0.65-1.01)        | 0.19                       |
| DRBI_10_Q         | 26        | 6176         | 8075        | 0.545                 | 0.543              | 0.97 (0.9-1.05)         | 0.42                       |
| DRBI_10_Y         | 26        | 5344         | 7071        | 0.442                 | 0.446              | 1.03 (0.96-1.10)        | 0.46                       |
| DRBI_11_G         | 26        | 1951         | 2675        | 0.131                 | 0.134              | 0.99 (0.92-1.06)        | 0.74                       |
| DRBI_11_L         | 26        | 1566         | 2150        | 0.106                 | 0.111              | 1.06 (0.98-1.15)        | 0.22                       |
| DRBI_11_P         | 26        | 2364         | 3215        | 0.163                 | 0.174              | 1.08 (1.01-1.16)        | 0.14                       |
| DRBI_11_S         | 26        | 5344         | 7071        | 0.442                 | 0.446              | 1.03 (0.96-1.10)        | 0.46                       |
| <b>DRBI_11_V</b>  | <b>26</b> | <b>2051</b>  | <b>2338</b> | <b>0.141</b>          | <b>0.121</b>       | <b>0.84 (0.78-0.90)</b> | <b>1.1×10<sup>-4</sup></b> |
| DRBI_12_K         | 26        | 6256         | 8177        | 0.558                 | 0.554              | 0.97 (0.89-1.05)        | 0.42                       |
| DRBI_12_T         | 26        | 5344         | 7071        | 0.442                 | 0.446              | 1.03 (0.96-1.10)        | 0.46                       |
| DRBI_13_F         | 26        | 1834         | 2490        | 0.126                 | 0.129              | 1.05 (0.98-1.13)        | 0.29                       |
| DRBI_13_G         | 26        | 741          | 995         | 0.047                 | 0.048              | 1.04 (0.94-1.16)        | 0.46                       |
| <b>DRBI_13_H</b>  | <b>26</b> | <b>1892</b>  | <b>2159</b> | <b>0.128</b>          | <b>0.111</b>       | <b>0.84 (0.78-0.91)</b> | <b>1.4×10<sup>-4</sup></b> |
| DRBI_13_R         | 26        | 2364         | 3215        | 0.163                 | 0.174              | 1.08 (1.01-1.16)        | 0.14                       |
| DRBI_13_S         | 26        | 4888         | 6496        | 0.392                 | 0.396              | 1.03 (0.97-1.10)        | 0.36                       |
| DRBI_13_Y         | 26        | 1951         | 2675        | 0.131                 | 0.134              | 0.99 (0.92-1.06)        | 0.74                       |
| DRBI_14_E         | 26        | 7665         | 10041       | 0.869                 | 0.866              | 0.95 (0.75-1.21)        | 0.70                       |
| DRBI_14_K         | 26        | 1951         | 2675        | 0.131                 | 0.134              | 0.99 (0.92-1.06)        | 0.74                       |
| DRBI_16_H         | 26        | 7771         | 10203       | 0.953                 | 0.952              | 1.06 (0.61-1.84)        | 0.83                       |

| Amino acid       | N studies | N controls + | N cases +   | F <sub>controls</sub> | F <sub>cases</sub> | OR (95% CI)             | FDR q-value                |
|------------------|-----------|--------------|-------------|-----------------------|--------------------|-------------------------|----------------------------|
| DRBI_16_Y        | 26        | 741          | 995         | 0.047                 | 0.048              | 1.04 (0.94-1.16)        | 0.46                       |
| DRBI_25_Q        | 26        | 1951         | 2675        | 0.131                 | 0.134              | 0.99 (0.92-1.06)        | 0.74                       |
| DRBI_25_R        | 26        | 7665         | 10041       | 0.869                 | 0.866              | 0.95 (0.75-1.21)        | 0.70                       |
| DRBI_26_F        | 26        | 7248         | 9501        | 0.737                 | 0.734              | 0.93 (0.83-1.05)        | 0.31                       |
| DRBI_26_L        | 26        | 1935         | 2648        | 0.134                 | 0.138              | 1.06 (0.99-1.14)        | 0.19                       |
| DRBI_26_Y        | 26        | 1897         | 2516        | 0.125                 | 0.127              | 1.02 (0.95-1.10)        | 0.52                       |
| DRBI_28_D        | 26        | 7159         | 9395        | 0.724                 | 0.718              | 1.05 (0.94-1.18)        | 0.38                       |
| DRBI_28_E        | 26        | 3582         | 4905        | 0.268                 | 0.274              | 1.04 (0.98-1.11)        | 0.29                       |
| DRBI_30_C        | 26        | 1566         | 2150        | 0.106                 | 0.111              | 1.06 (0.98-1.15)        | 0.22                       |
| DRBI_30_H        | 24        | 243          | 343         | 0.015                 | 0.016              | 1.09 (0.92-1.31)        | 0.33                       |
| DRBI_30_L        | 26        | 1951         | 2675        | 0.131                 | 0.134              | 0.99 (0.92-1.06)        | 0.74                       |
| DRBI_30_R        | 24        | 182          | 198         | 0.011                 | 0.009              | 0.81 (0.65-1.01)        | 0.19                       |
| DRBI_30_Y        | 26        | 7159         | 9395        | 0.724                 | 0.718              | 1.05 (0.94-1.18)        | 0.38                       |
| DRBI_31_F        | 26        | 7649         | 10066       | 0.874                 | 0.871              | 1.15 (0.91-1.45)        | 0.31                       |
| DRBI_31_I        | 26        | 1679         | 2307        | 0.114                 | 0.118              | 1.07 (0.99-1.15)        | 0.19                       |
| DRBI_31_V        | 24        | 182          | 198         | 0.011                 | 0.009              | 0.81 (0.65-1.01)        | 0.19                       |
| DRBI_32_H        | 26        | 4021         | 5201        | 0.303                 | 0.298              | 0.99 (0.93-1.05)        | 0.73                       |
| DRBI_32_Y        | 26        | 7073         | 9328        | 0.697                 | 0.702              | 1.01 (0.91-1.13)        | 0.86                       |
| <b>DRBI_33_H</b> | <b>26</b> | <b>1892</b>  | <b>2159</b> | <b>0.128</b>          | <b>0.111</b>       | <b>0.84 (0.78-0.91)</b> | <b>1.4×10<sup>-4</sup></b> |
| DRBI_33_N        | 26        | 7637         | 10087       | 0.872                 | 0.889              | 1.29 (1.02-1.64)        | 0.17                       |
| DRBI_37_F        | 26        | 2420         | 3262        | 0.167                 | 0.168              | 0.98 (0.92-1.05)        | 0.59                       |
| DRBI_37_L        | 24        | 243          | 343         | 0.015                 | 0.016              | 1.09 (0.92-1.31)        | 0.33                       |
| DRBI_37_N        | 26        | 3378         | 4426        | 0.244                 | 0.242              | 1.02 (0.95-1.08)        | 0.61                       |
| <b>DRBI_37_S</b> | <b>26</b> | <b>3669</b>  | <b>5001</b> | <b>0.273</b>          | <b>0.285</b>       | <b>1.10 (1.03-1.17)</b> | <b>0.03</b>                |
| DRBI_37_Y        | 26        | 3906         | 4977        | 0.294                 | 0.279              | 0.93 (0.87-0.99)        | 0.14                       |
| DRBI_38_A        | 24        | 182          | 198         | 0.011                 | 0.009              | 0.81 (0.65-1.01)        | 0.19                       |
| DRBI_38_L        | 24        | 243          | 343         | 0.015                 | 0.016              | 1.09 (0.92-1.31)        | 0.33                       |
| DRBI_38_V        | 26        | 7789         | 10229       | 0.974                 | 0.974              | 1.17 (0.41-3.29)        | 0.77                       |
| DRBI_40_F        | 24        | 7796         | 10235       | 0.989                 | 0.991              | 0.83 (0.06-10.99)       | 0.89                       |
| DRBI_40_Y        | 24        | 182          | 198         | 0.011                 | 0.009              | 0.81 (0.65-1.01)        | 0.19                       |
| DRBI_47_F        | 26        | 5830         | 7750        | 0.499                 | 0.512              | 1.07 (0.99-1.15)        | 0.19                       |
| DRBI_47_Y        | 26        | 5831         | 7550        | 0.501                 | 0.488              | 0.92 (0.86-0.99)        | 0.16                       |
| DRBI_57_A        | 26        | 547          | 677         | 0.032                 | 0.033              | 0.95 (0.84-1.08)        | 0.43                       |
| DRBI_57_D        | 26        | 7317         | 9608        | 0.761                 | 0.755              | 1.07 (0.94-1.22)        | 0.33                       |
| DRBI_57_S        | 26        | 728          | 994         | 0.045                 | 0.048              | 1.02 (0.92-1.14)        | 0.66                       |
| DRBI_57_V        | 26        | 2260         | 3116        | 0.155                 | 0.161              | 1.01 (0.95-1.09)        | 0.68                       |
| DRBI_58_A        | 26        | 7719         | 10103       | 0.893                 | 0.887              | 0.76 (0.56-1.02)        | 0.19                       |
| DRBI_58_E        | 26        | 1549         | 2164        | 0.107                 | 0.113              | 1.05 (0.97-1.14)        | 0.31                       |
| DRBI_60_H        | 26        | 547          | 677         | 0.032                 | 0.033              | 0.95 (0.84-1.08)        | 0.43                       |
| DRBI_60_S        | 26        | 2260         | 3116        | 0.155                 | 0.161              | 1.01 (0.95-1.09)        | 0.68                       |
| DRBI_60_Y        | 26        | 7497         | 9838        | 0.809                 | 0.805              | 1.05 (0.89-1.23)        | 0.57                       |
| DRBI_67_F        | 26        | 2339         | 3222        | 0.168                 | 0.178              | 1.06 (0.99-1.14)        | 0.19                       |
| DRBI_67_I        | 26        | 5322         | 7102        | 0.438                 | 0.444              | 1.02 (0.96-1.09)        | 0.52                       |
| DRBI_67_L        | 26        | 4946         | 6250        | 0.392                 | 0.375              | 0.92 (0.86-0.98)        | 0.14                       |
| DRBI_70_D        | 26        | 5485         | 7288        | 0.471                 | 0.472              | 0.99 (0.92-1.06)        | 0.82                       |
| DRBI_70_Q        | 26        | 5675         | 7339        | 0.473                 | 0.475              | 0.97 (0.9-1.04)         | 0.35                       |
| DRBI_70_R        | 26        | 839          | 1027        | 0.052                 | 0.051              | 0.94 (0.85-1.04)        | 0.30                       |
| DRBI_71_A        | 26        | 2012         | 2721        | 0.133                 | 0.143              | 1.07 (0.99-1.14)        | 0.19                       |
| DRBI_71_E        | 26        | 1961         | 2504        | 0.135                 | 0.130              | 0.97 (0.90-1.04)        | 0.40                       |
| DRBI_71_K        | 26        | 2912         | 3698        | 0.200                 | 0.193              | 0.96 (0.90-1.03)        | 0.31                       |
| DRBI_71_R        | 26        | 5882         | 7847        | 0.527                 | 0.528              | 1.02 (0.95-1.10)        | 0.55                       |

| Amino acid        | N studies | N controls + | N cases +   | F <sub>controls</sub> | F <sub>cases</sub> | OR (95% CI)             | FDR q-value                |
|-------------------|-----------|--------------|-------------|-----------------------|--------------------|-------------------------|----------------------------|
| DRBI_73_A         | 26        | 7294         | 9589        | 0.749                 | 0.745              | 1.07 (0.95-1.22)        | 0.31                       |
| DRBI_73_G         | 26        | 3474         | 4732        | 0.251                 | 0.255              | 1.03 (0.96-1.09)        | 0.42                       |
| DRBI_74_A         | 26        | 6868         | 9050        | 0.661                 | 0.660              | 1.07 (0.97-1.18)        | 0.26                       |
| DRBI_74_E         | 26        | 835          | 1011        | 0.052                 | 0.050              | 0.93 (0.84-1.03)        | 0.26                       |
| DRBI_74_L         | 26        | 506          | 666         | 0.031                 | 0.031              | 1.02 (0.90-1.16)        | 0.78                       |
| DRBI_74_Q         | 26        | 1951         | 2675        | 0.131                 | 0.134              | 0.99 (0.92-1.06)        | 0.74                       |
| DRBI_74_R         | 26        | 1788         | 2365        | 0.118                 | 0.119              | 1.02 (0.94-1.10)        | 0.64                       |
| DRBI_77_N         | 26        | 1788         | 2365        | 0.118                 | 0.119              | 1.02 (0.94-1.10)        | 0.64                       |
| DRBI_77_T         | 26        | 7691         | 10093       | 0.882                 | 0.881              | 0.97 (0.74-1.27)        | 0.83                       |
| DRBI_78_V         | 26        | 2064         | 2827        | 0.139                 | 0.142              | 0.99 (0.93-1.07)        | 0.87                       |
| DRBI_78_Y         | 26        | 7648         | 10019       | 0.861                 | 0.858              | 0.96 (0.77-1.21)        | 0.75                       |
| DRBI_85_A         | 26        | 470          | 695         | 0.030                 | 0.034              | 1.08 (0.95-1.23)        | 0.31                       |
| DRBI_85_V         | 26        | 7779         | 10223       | 0.970                 | 0.966              | 1.95 (0.93-4.11)        | 0.19                       |
| DRBI_86_G         | 26        | 6165         | 8083        | 0.539                 | 0.539              | 0.98 (0.91-1.06)        | 0.56                       |
| DRBI_86_V         | 26        | 5533         | 7181        | 0.461                 | 0.461              | 0.98 (0.91-1.05)        | 0.49                       |
| DRBI_96_E         | 26        | 1566         | 2150        | 0.106                 | 0.111              | 1.06 (0.98-1.15)        | 0.22                       |
| DRBI_96_H         | 26        | 6405         | 8561        | 0.585                 | 0.591              | 1.06 (0.97-1.15)        | 0.29                       |
| DRBI_96_Q         | 26        | 2519         | 3378        | 0.176                 | 0.185              | 1.06 (0.99-1.13)        | 0.19                       |
| <b>DRBI_96_Y</b>  | <b>26</b> | <b>1892</b>  | <b>2159</b> | <b>0.128</b>          | <b>0.111</b>       | <b>0.84 (0.78-0.91)</b> | <b>1.4×10<sup>-4</sup></b> |
| <b>DRBI_98_E</b>  | <b>26</b> | <b>3667</b>  | <b>4613</b> | <b>0.271</b>          | <b>0.255</b>       | <b>0.89 (0.84-0.95)</b> | <b>6.4×10<sup>-3</sup></b> |
| DRBI_98_K         | 26        | 7199         | 9496        | 0.729                 | 0.745              | 1.10 (0.98-1.24)        | 0.20                       |
| <b>DRBI_104_A</b> | <b>26</b> | <b>3667</b>  | <b>4613</b> | <b>0.271</b>          | <b>0.255</b>       | <b>0.89 (0.84-0.95)</b> | <b>6.4×10<sup>-3</sup></b> |
| DRBI_104_S        | 26        | 7199         | 9496        | 0.729                 | 0.745              | 1.10 (0.98-1.24)        | 0.20                       |
| DRBI_112_H        | 26        | 7788         | 10216       | 0.968                 | 0.967              | 0.48 (0.21-1.11)        | 0.19                       |
| DRBI_112_Y        | 26        | 547          | 677         | 0.032                 | 0.033              | 0.95 (0.84-1.08)        | 0.43                       |
| <b>DRBI_120_N</b> | <b>26</b> | <b>2051</b>  | <b>2338</b> | <b>0.141</b>          | <b>0.121</b>       | <b>0.84 (0.78-0.9)</b>  | <b>1.1×10<sup>-4</sup></b> |
| DRBI_120_S        | 26        | 7613         | 10066       | 0.859                 | 0.879              | 1.33 (1.07-1.67)        | 0.12                       |
| DRBI_133_L        | 26        | 2364         | 3215        | 0.163                 | 0.174              | 1.08 (1.01-1.16)        | 0.14                       |
| DRBI_133_R        | 26        | 7569         | 9950        | 0.837                 | 0.826              | 0.97 (0.80-1.16)        | 0.71                       |
| DRBI_140_A        | 26        | 5135         | 6951        | 0.415                 | 0.431              | 1.08 (1.01-1.15)        | 0.17                       |
| DRBI_140_T        | 26        | 6458         | 8354        | 0.585                 | 0.569              | 0.93 (0.85-1.01)        | 0.19                       |
| DRBI_142_M        | 26        | 2364         | 3215        | 0.163                 | 0.174              | 1.08 (1.01-1.16)        | 0.14                       |
| DRBI_142_V        | 26        | 7569         | 9950        | 0.837                 | 0.826              | 0.97 (0.80-1.16)        | 0.71                       |
| DRBI_149_H        | 26        | 5344         | 7071        | 0.442                 | 0.446              | 1.03 (0.96-1.10)        | 0.46                       |
| DRBI_149_Q        | 26        | 6256         | 8177        | 0.558                 | 0.554              | 0.97 (0.89-1.05)        | 0.42                       |
| DRBI_166_Q        | 24        | 182          | 198         | 0.011                 | 0.009              | 0.81 (0.65-1.01)        | 0.19                       |
| DRBI_166_R        | 24        | 7796         | 10235       | 0.989                 | 0.991              | 0.83 (0.06-10.99)       | 0.89                       |
| <b>DRBI_180_L</b> | <b>26</b> | <b>1892</b>  | <b>2159</b> | <b>0.128</b>          | <b>0.111</b>       | <b>0.84 (0.78-0.91)</b> | <b>1.4×10<sup>-4</sup></b> |
| DRBI_180_V        | 26        | 7637         | 10087       | 0.872                 | 0.889              | 1.29 (1.02-1.64)        | 0.17                       |
| DRBI_181_M        | 26        | 2219         | 2997        | 0.151                 | 0.153              | 0.98 (0.91-1.05)        | 0.55                       |
| DRBI_181_T        | 26        | 7620         | 9989        | 0.849                 | 0.847              | 1.02 (0.83-1.26)        | 0.84                       |
| DRBI_189_R        | 26        | 7784         | 10220       | 0.969                 | 0.969              | 1.28 (0.58-2.79)        | 0.54                       |
| DRBI_189_S        | 26        | 506          | 666         | 0.031                 | 0.031              | 1.02 (0.90-1.16)        | 0.78                       |
| DRBI_231_P        | 24        | 182          | 198         | 0.011                 | 0.009              | 0.81 (0.65-1.01)        | 0.19                       |
| DRBI_231_Q        | 24        | 7796         | 10235       | 0.989                 | 0.991              | 0.83 (0.06-10.99)       | 0.89                       |
| DRBI_233_R        | 26        | 5055         | 6697        | 0.409                 | 0.414              | 1.02 (0.96-1.09)        | 0.47                       |
| DRBI_233_T        | 26        | 6486         | 8486        | 0.591                 | 0.586              | 0.97 (0.89-1.05)        | 0.46                       |

F<sub>controls</sub>, pooled frequency of alleles in controls; F<sub>cases</sub>, pooled frequency of alleles in cases.

Odds ratios (OR) and 95% confidence intervals (CI) are computed under a dominant model adjusted for sex, study, and four principal components. Significant amino-acids are highlighted in bold characters.

<sup>a</sup> Amino acids finally retained after using backwards selection for a model including 11 amino-acids associated with PD in univariate analyses and all their 2x2 interactions.



**Supplementary table 6 Independent and joint associations of amino-acids V11 and H13 or H33 encoded by *HLA-DRBI* and Parkinson's disease**

| DRBI_13_H or |                        | N controls | N cases | OR (95% CI)      | P                    |
|--------------|------------------------|------------|---------|------------------|----------------------|
| DRBI_11_V    | DRBI_33_H <sup>a</sup> |            |         |                  |                      |
| -            | -                      | 5746       | 7899    | 1.00 (ref.)      | --                   |
| +            | -                      | 159        | 179     | 0.82 (0.65-1.03) | 0.09                 |
| -            | +                      | 0          | 0       | --               | --                   |
| +            | +                      | 1892       | 2159    | 0.84 (0.78-0.90) | 4.9×10 <sup>-6</sup> |

Odds ratios (OR) and 95% confidence intervals (CI) are computed under a dominant model adjusted for sex, study, and four principal components.

<sup>a</sup> DRBI\_13\_H and DRBI\_33\_H are in perfect LD.

While no participants carried H13/H33 in the absence of V11, some participants carried V11 in the absence of H13(H33). Compared to V11-H13(H33)-, the association was similar for V11+H13(H33)- (OR=0.82) and V11+H13(H33)+ (OR=0.84); thus, H13(H33) had no effect among V11 carriers (OR=1.03, 95% CI=0.81-1.30, P=0.84).

**Supplementary table 7 Independent and joint associations of the shared epitope (SE) and VII with Parkinson's disease**

| SE | VII | N controls | N cases | OR (95% CI)      | P                    | P <sub>Interaction</sub> |
|----|-----|------------|---------|------------------|----------------------|--------------------------|
| -  | -   | 4995       | 6837    | 1.00 (ref.)      | -                    |                          |
| +  | -   | 1435       | 2026    | 1.04 (0.96-1.13) | 0.34                 |                          |
| -  | +   | 287        | 308     | 0.74 (0.62-0.88) | 8.6×10 <sup>-4</sup> |                          |
| +  | +   | 1968       | 2275    | 0.86 (0.80-0.93) | 1.0×10 <sup>-4</sup> | 0.29                     |

**Multiadjusted**

|               |                  |                      |
|---------------|------------------|----------------------|
| SE+ vs. SE-   | 1.06 (0.98-1.14) | 0.13                 |
| VII+ vs. VII- | 0.81 (0.74-0.88) | 6.3×10 <sup>-7</sup> |

Odds ratios (OR) and 95% confidence intervals (CI) are computed under a dominant model adjusted for sex, study, and four principal components.

The OR comparing SE+VII+ to SE-VII+ is 1.16 (95% CI=0.97-1.39, P=0.11).

The OR comparing SE+VII+ to SE-VII- is 0.83 (95% CI=0.75-0.91, P=1.2×10<sup>-4</sup>).

The following alleles carried both the SE and VII: *HLA-DRB1\*04:01*, *HLA-DRB1\*04:04*, *HLA-DRB1\*04:05*, *HLA-DRB1\*04:08*, *HLA-DRB1\*10:01*.

The following alleles carried the SE only: *HLA-DRB1\*01:01*, *HLA-DRB1\*01:02*.

The following alleles carried VII only: *HLA-DRB1\*04:02*, *HLA-DRB1\*04:03*, *HLA-DRB1\*04:06*, *HLA-DRB1\*04:07*.

**Supplementary table 8 Mendelian randomization analysis of the relation between genetically-predicted smoking initiation and Parkinson's disease stratified by *HLA-DRB1*: exclusion of 31 pleiotropic SNPs**

| <i>HLA-DRB1</i>                       | 0 allele or AA residue                                          |      |        | 1/2 alleles or AA residues                                      |                   |        | Interaction OR (95% CI) <sup>c</sup> | P                    |
|---------------------------------------|-----------------------------------------------------------------|------|--------|-----------------------------------------------------------------|-------------------|--------|--------------------------------------|----------------------|
|                                       | OR per 1-SD increase in the prevalence of ever smoking (95% CI) | P    | P-het. | OR per 1-SD increase in the prevalence of ever smoking (95% CI) | P                 | P-het. |                                      |                      |
| <b>Valine 11<sup>a</sup></b>          | 6383 controls, 8812 cases                                       |      |        | 2212 controls, 2531 cases                                       |                   |        |                                      |                      |
| Inverse variance weighted             | 0.73 (0.56-0.94)                                                | 0.01 | 0.77   | 1.42 (0.90-2.25)                                                | 0.13              | 0.37   | 1.96 (1.16-3.30)                     | 0.01                 |
| Weighted median                       | 0.69 (0.46-1.02)                                                | 0.06 |        | 1.46 (0.74-2.88)                                                | 0.28              |        | 2.13 (0.98-4.64)                     | 0.06                 |
| Weighted mode                         | 0.46 (0.17-1.19)                                                | 0.11 |        | 3.50 (0.55-22.0)                                                | 0.18              |        | 7.68 (1.03-57.2)                     | 0.05                 |
| MR-Lasso                              | No invalid SNP ( $\lambda=0.22$ )                               |      |        | 1.54 (0.98-2.44)                                                | 0.06 <sup>d</sup> |        | 2.12 (1.25-3.58)                     | 5.0×10 <sup>-3</sup> |
| MR-PRESSO                             |                                                                 |      | 0.63   |                                                                 |                   | 0.48   |                                      |                      |
| <b>rs660895-G<sup>b</sup></b>         | 6498 controls, 8903 cases                                       |      |        | 2982 controls, 3521 cases                                       |                   |        |                                      |                      |
| Inverse variance weighted             | 0.72 (0.56-0.92)                                                | 0.01 | 0.88   | 1.46 (0.99-2.14)                                                | 0.06              | 0.35   | 2.02 (1.28-3.19)                     | 3.0×10 <sup>-3</sup> |
| Weighted median                       | 0.67 (0.46-0.96)                                                | 0.03 |        | 1.21 (0.68-2.15)                                                | 0.51              |        | 1.82 (0.92-3.59)                     | 0.08                 |
| Weighted mode                         | 0.58 (0.22-1.52)                                                | 0.27 |        | 1.39 (0.30-6.46)                                                | 0.67              |        | 2.40 (0.43-13.25)                    | 0.34                 |
| MR-Lasso                              | No invalid SNP ( $\lambda=0.19$ )                               |      |        | 1.40 (0.95-2.05)                                                | 0.09 <sup>e</sup> |        | 1.94 (1.23-3.06)                     | 4.3×10 <sup>-3</sup> |
| MR-PRESSO                             |                                                                 |      | 0.88   |                                                                 |                   | 0.31   |                                      |                      |
| <b><i>HLA-DRB1</i>*04<sup>a</sup></b> | 6563 controls, 9014 cases                                       |      |        | 2032 controls, 2329 cases                                       |                   |        |                                      |                      |
| Inverse variance weighted             | 0.73 (0.57-0.94)                                                | 0.01 | 0.81   | 1.41 (0.86-2.31)                                                | 0.17              | 0.55   | 1.94 (1.11-3.37)                     | 0.02                 |
| Weighted median                       | 0.64 (0.44-0.94)                                                | 0.02 |        | 1.47 (0.70-3.12)                                                | 0.31              |        | 2.30 (0.99-5.34)                     | 0.06                 |
| Weighted mode                         | 0.52 (0.21-1.31)                                                | 0.17 |        | 2.00 (0.30-13.25)                                               | 0.48              |        | 3.82 (0.51-28.77)                    | 0.21                 |
| MR-Lasso                              | No invalid SNP ( $\lambda=0.20$ )                               |      |        | 1.41 (0.86-2.31)                                                | 0.17 <sup>f</sup> |        | 1.94 (1.11-3.37)                     | 0.02                 |
| MR-PRESSO                             |                                                                 |      | 0.70   |                                                                 |                   | 0.67   |                                      |                      |

OR, odds ratio; CI, confidence interval; AA, amino acid; P-het., P for heterogeneity;  $\lambda$ , tuning parameter for MR-Lasso.

Valine 11 amino-acids and *HLA-DRB1*\*04 alleles were determined using imputation of HLA alleles and amino-acids based on SNPs from the HLA region.

After excluding 31 pleiotropic SNPs, analyses are based on 151 SNPs.

<sup>a</sup> Total number: 8595 controls, 11343 cases.

<sup>b</sup> Total number: 9480 controls, 12424 cases.

<sup>c</sup> The interaction OR represents the OR in carriers of 1/2 alleles or AA residues divided by the OR in carriers of 0 allele or AA residue.

<sup>d</sup> Number of invalid SNPs=3;  $\lambda=0.19$ .

<sup>e</sup> Number of invalid SNPs=5;  $\lambda=0.21$ .

<sup>f</sup> Number of invalid SNPs=7;  $\lambda=0.23$ .

**Supplementary table 9 *In silico* prediction of binding affinity of HLA-DRB1 alleles to alpha-synuclein derived peptides**

| <b>Binding affinity (nM)</b>                                 | <b>Category</b> | <b>Mean</b> | <b>SD</b> | <b>Min</b> | <b>Max</b> | <b>P 25th</b> | <b>P 50th</b> | <b>P 75th</b> |
|--------------------------------------------------------------|-----------------|-------------|-----------|------------|------------|---------------|---------------|---------------|
| <b><u>All HLA-DRB1 alleles (n=607)</u></b>                   |                 |             |           |            |            |               |               |               |
| <b>All peptides</b>                                          | 0 HC-VII-       | 5856        | 5998      | 31         | 34583      | 1461          | 3788          | 8120          |
|                                                              | 1 HC-VII+       | 6971        | 5484      | 76         | 26950      | 2507          | 5645          | 10161         |
|                                                              | 2 HC+VII-       | 8202        | 6900      | 47         | 35140      | 2843          | 6046          | 11711         |
|                                                              | 3 HC+VII-       | 7185        | 5815      | 63         | 28642      | 2620          | 5606          | 10228         |
| <b>Y39</b>                                                   | 0 HC-VII-       | 2426        | 2908      | 31         | 23497      | 653           | 1533          | 3145          |
|                                                              | 1 HC-VII+       | 4465        | 2734      | 614        | 12178      | 2487          | 3398          | 6835          |
|                                                              | 2 HC+VII-       | 4152        | 3912      | 97         | 27407      | 1457          | 3156          | 4870          |
|                                                              | 3 HC+VII-       | 3667        | 2588      | 535        | 13589      | 1613          | 2490          | 6315          |
| <b><u>HLA-DRB1 alleles observed in Courage-PD (n=34)</u></b> |                 |             |           |            |            |               |               |               |
| <b>All peptides</b>                                          | 0 HC-VII-       | 6205        | 6772      | 42         | 34583      | 1455          | 3661          | 8222          |
|                                                              | 1 HC-VII+       | 6723        | 5394      | 116        | 25050      | 2342          | 5393          | 9655          |
|                                                              | 2 HC+VII-       | 8457        | 7526      | 47         | 35140      | 2810          | 5818          | 11923         |
|                                                              | 3 HC+VII-       | 6899        | 5734      | 97         | 26245      | 2440          | 5429          | 9782          |
| <b>Y39</b>                                                   | 0 HC-VII-       | 2610        | 4617      | 97         | 23497      | 703           | 1262          | 2130          |
|                                                              | 1 HC-VII+       | 4607        | 2942      | 959        | 8834       | 3075          | 3398          | 8131          |
|                                                              | 2 HC+VII-       | 4038        | 5383      | 365        | 27407      | 1457          | 2592          | 3964          |
|                                                              | 3 HC+VII-       | 3601        | 2495      | 726        | 6742       | 1809          | 2490          | 6378          |

SD, standard deviation; P, percentile; HC, homocitrullination of alpha-synuclein derived peptides; VII, valine at position 11 of the protein encoded by HLA-DRB1 alleles. We assessed the binding affinity of HLA-DRB1 alleles to peptides derived from alpha-synuclein using NetMHCIIpan 4.0.

**Supplementary table 10 *In silico* prediction of binding and non-binding alpha-synuclein derived peptides**

| N (%)                                                             | Category      |                                      |                                                     |                                                     |
|-------------------------------------------------------------------|---------------|--------------------------------------|-----------------------------------------------------|-----------------------------------------------------|
|                                                                   | 0<br>HC-V11-  | 1<br>HC-V11+                         | 2<br>HC+V11-                                        | 3<br>HC+V11+                                        |
| <b>All HLA-DRB1 alleles (n=607)<sup>a</sup></b>                   |               |                                      |                                                     |                                                     |
| <b>Binder</b>                                                     | 6874 (13.82)  | 1087 (12.72)                         | 1762 (3.54)                                         | 843 (9.87)                                          |
| <b>Non-binder</b>                                                 | 42854 (86.18) | 7457 (87.28)                         | 47966 (96.46)                                       | 7701 (90.13)                                        |
| <b>OR binder vs. non-binder (95% CI)</b>                          | 1.00 (ref)    | 0.91 (0.85-0.97)<br><i>P</i> =0.0062 | 0.23 (0.22-0.24)<br><i>P</i> <1.0×10 <sup>-50</sup> | 0.68 (0.63-0.74)<br><i>P</i> =3.6×10 <sup>-23</sup> |
| <b>HLA-DRB1 alleles observed in Courage-PD (n=34)<sup>b</sup></b> |               |                                      |                                                     |                                                     |
| <b>Binder</b>                                                     | 348 (14.5)    | 118 (13.66)                          | 95 (3.96)                                           | 85 (9.84)                                           |
| <b>Non-binder</b>                                                 | 2052 (85.5)   | 746 (86.34)                          | 2305 (96.04)                                        | 779 (90.16)                                         |
| <b>OR binder vs. non-binder (95% CI)</b>                          | 1.00 (ref)    | 0.93 (0.75-1.17)<br><i>P</i> =0.54   | 0.24 (0.19-0.31)<br><i>P</i> =3.1×10 <sup>-32</sup> | 0.64 (0.50-0.83)<br><i>P</i> =5.8×10 <sup>-4</sup>  |

HC, homocitrullination of alpha-synuclein derived peptides: V11, valine at position 11 encoded by HLA-DRB1 alleles.

The percentage of binding peptides was determined using NetMHCIIpan 4.0.

Odds ratios (OR) and 95% confidence intervals (CI) computed using multinomial logistic regression.

<sup>a</sup> OR<sub>3 vs. 1</sub>=0.75 (95% CI=0.68-0.83; *P*=4.0×10<sup>-9</sup>). OR<sub>3 vs. 2</sub>=2.98 (95% CI=2.74-3.25; *P*<1.0×10<sup>-50</sup>). Interaction OR=3.28 (95% CI=2.94-3.66; *P*<1.0×10<sup>-50</sup>).

<sup>b</sup> OR<sub>3 vs. 1</sub>=0.69 (95% CI=0.51-0.93; *P*=0.01). OR<sub>3 vs. 2</sub>=2.65 (95% CI=1.95-3.59; *P*=3.3×10<sup>-10</sup>). Interaction OR=2.84 (95% CI=1.95-4.14; *P*=6.3×10<sup>-8</sup>).
